# Supplementary material for: On the nature of the B⋯N interaction and the conformational flexibility of arylboronic azaesters
Source: Royal Society of Chemistry journal article supplement (doi:10.1039/c0cp00030b), 2010-01-01
Supplement: c0cp00030b.pdf [file c0cp00030b.pdf]

## SUPPORTING INFORMATION

### **On the Nature of the B...N Interaction and the Conformational Flexibility of Arylboronic Azaesters**

*Krzysztof Durka, Radosław Kamiński, Sergiusz Luliński,\* Janusz Serwatowski and  
Krzysztof Woźniak\**

Department of Chemistry, University of Warsaw, Pasteura 1, 02-093 Warszawa, Poland  
and Department of Chemistry, Warsaw University of Technology, Noakowskiego 3, 00-664 Warszawa,  
Poland

## Table of Contents

|                                                                                                                                                                                                                                                |            |
|------------------------------------------------------------------------------------------------------------------------------------------------------------------------------------------------------------------------------------------------|------------|
| <b>1. Methods – additional information</b>                                                                                                                                                                                                     | <b>S4</b>  |
| <b>2. Azaesters of arylboronic acids – literature report</b>                                                                                                                                                                                   | <b>S5</b>  |
| Table 1S. Molecular structures of arylboronic azaesters previously reported in the literature                                                                                                                                                  | S5         |
| <b>3. Molecular structure of 1 and multipole refinement details</b>                                                                                                                                                                            | <b>S7</b>  |
| Table 2S. Crystal data                                                                                                                                                                                                                         | S7         |
| Figure 1S. Residual density maps in B(1)N(1)C(1) and C(1)C(2)C(3) planes                                                                                                                                                                       | S8         |
| Figure 2S. Experimental static deformation density maps                                                                                                                                                                                        | S8         |
| Figure 3S. Averaged plot showing the $ F_o  /  F_c $ versus resolution                                                                                                                                                                         | S9         |
| Figure 4S. Normal probability plot                                                                                                                                                                                                             | S9         |
| Figure 5S. The plot of $F_o$ versus $F_c$                                                                                                                                                                                                      | S10        |
| Figure 6S. Estimated ADPs for hydrogen atoms                                                                                                                                                                                                   | S10        |
| Table 3S. Minima and maxima of residual density                                                                                                                                                                                                | S11        |
| Table 4S. Geometrical and topological parameters in BCPs for isolated molecule with electron density constructed from monopole populations, theoretical for isolated molecule with experimental geometry and theoretically optimised structure | S12        |
| <b>4. Quantum-chemical calculations</b>                                                                                                                                                                                                        | <b>S13</b> |
| Figure 7S. Energy scan performed at DFT level of theory (B3LYP) with 6-311++G** and aug-cc-pVDZ basis sets for 6-butyl-2-phenyl-( <i>N</i> - <i>B</i> )-1,3,6,2-dioxazaborocane                                                                | S13        |
| Table 5S. Integrated atomic charges and dipole moments for theoretical isolated molecule with experimental geometry and theoretically optimised structure                                                                                      | S14        |
| Table 6S. Cartesian coordinates for 1 used in theoretical calculations for open and closed form                                                                                                                                                | S15        |
| Table 7S. Calculated relative energies of the B–N energy scans for the azaesters derivatives.                                                                                                                                                  | S16        |
| Table 8S. Topological parameters at BCPs of boron-nitrogen dative bonds in 1 for computed scan steps                                                                                                                                           | S17        |
| Table 9S. Topological parameters at the BCPs of boron-nitrogen dative bonds for closed forms of halide-substituted azaesters used in theoretical calculations together with associated B–N bond lengths                                        | S17        |
| Table 10S. The B–O and B–C bond lengths in 1, as a function of the B...N distances for different scan steps – numerical values.                                                                                                                | S18        |
| Table 11S. Second-order perturbation theory analyses of the Kohn-Sham equations on NBO basis for compound 1                                                                                                                                    | S19        |
| Table 12S. Different dipole moments for closed and open forms of compound 1                                                                                                                                                                    | S20        |
| Figure 8S. Total dipole moments of 1 anchored approximately in the geometric centre of the molecule for closed and open forms                                                                                                                  | S20        |

|                                                                                                                                                                                                                                            |            |
|--------------------------------------------------------------------------------------------------------------------------------------------------------------------------------------------------------------------------------------------|------------|
| <b>5. VT NMR studies</b>                                                                                                                                                                                                                   | <b>S21</b> |
| Figure 9S. $^1\text{H}$ NMR spectra (500 MHz) for a solution of 1 in $\text{CD}_2\text{Cl}_2$ taken at five different temperatures: 25°C, -5°C, -30°C, -50°C and -90°C. Figure show peak assignment of closed and open forms of compound 1 | S22        |
| Figure 10S – 12S. $^{11}\text{B}$ NMR spectra of closed and open forms of 1 in the solution of $\text{CD}_2\text{Cl}_2$ recorded at 25°C, -50°C and -90°C                                                                                  | S23        |
| Figure 13S – 19S. $^1\text{H}$ NMR spectra of 1 in the solution of $\text{CD}_2\text{Cl}_2$ recorded at 15°C, 5°C, -5°C, -30°C, -50°C, -70°C and -90°C                                                                                     | S23        |
| <b>6. Scan coordinates</b>                                                                                                                                                                                                                 | <b>S28</b> |
| Table 13S ÷ 54S. Cartesian coordinates for azaesters scan steps                                                                                                                                                                            | S28        |

## 1. Methods – additional information

**The ellipticity.** The ellipticity of the bond is examined by the analyses of the eigenvalues of Hessian matrix (Hessian matrix is formed by nine second derivatives of electron densities).

$$\varepsilon = \frac{|\lambda_1|}{|\lambda_2|} - 1$$

$\lambda_1, \lambda_2$  are the eigenvalues of the Hessian matrix, perpendicular to the bond axis. In the case of the ideal sigma bond, ellipticity is equal to zero. The larger values of it indicate multiple bond character. However, in the case of triple bond this value is again equal to zero. Ellipticity is often examined at the BCP, but it could be also analysis along the whole bond path, which provides important information about curvature of the bond.

**Source function.** It has been shown that electron density  $\rho(r)$  at the point  $r$  within the atomic basin is regarded to consist of contributions from a local source ( $LS(r, r')$ ) operating at all other points  $r'$ :

$$\rho(r) = \int LS(r, r') dr' = -\frac{1}{4\pi} \int \frac{\nabla^2 \rho(r')}{|r - r'|} dr'$$

The integration of the local source over the atomic basin  $\Omega$  has been called source function contribution  $S(r, \Omega)$  from that atom to electron density  $\rho(r)$ :

$$S(r, \Omega) = \int_{\Omega} LS(r, r') dr'$$

According to this electron density can be viewed as determined solely by internal source function self-contribution and by external source function contribution from other atoms:

$$\rho(r) = S(r, \Omega) + \sum_{\Omega' \neq \Omega} S(r, \Omega')$$

Source function provides many chemical information as it shows the contribution from the atom to the whole density at any point within the molecule. For more details see ref 35.

## 2. Azaesters of arylboronic acids – literature report

**Table 1S.** Molecular structures of arylboronic azaesters previously reported in the literature together with B–N bond lengths.

| Molecular structure                                                                               | $d_{\text{B-N}}/\text{Å}$ | Ref. | Molecular structure                                                                                | $d_{\text{B-N}}/\text{Å}$ | Ref. |
|---------------------------------------------------------------------------------------------------|---------------------------|------|----------------------------------------------------------------------------------------------------|---------------------------|------|
| 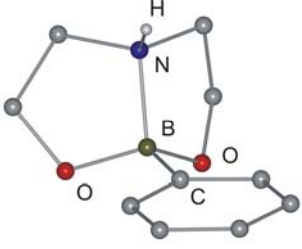 <p>PBORXZ</p>   | 1.660                     | [13] |  <p>COQRAB</p>   | 1.672                     | [14] |
|  <p>GEDTOZ</p>  | 1.690                     | [15] |  <p>GEDTIT</p>  | 1.684                     | [15] |
|  <p>GEDTEP</p> | 1.712                     | [16] |  <p>NIVYEW</p> | 1.661                     | [16] |
|  <p>SIBGIT</p> | 1.714                     | [17] |  <p>EYIWUE</p> | 1.696                     | [18] |

|                                                                                                                                                                                                                                                                                                                                                                                                      |       |      |                                                                                                                                                                                                                                                                                                                                                                                                                    |       |      |
|------------------------------------------------------------------------------------------------------------------------------------------------------------------------------------------------------------------------------------------------------------------------------------------------------------------------------------------------------------------------------------------------------|-------|------|--------------------------------------------------------------------------------------------------------------------------------------------------------------------------------------------------------------------------------------------------------------------------------------------------------------------------------------------------------------------------------------------------------------------|-------|------|
| 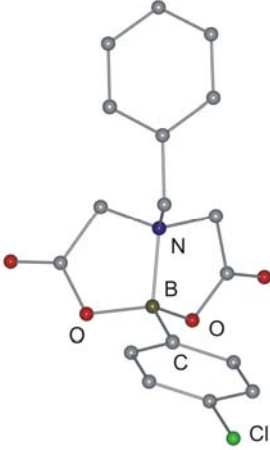 <p>ORTEP diagram of SEBPIZ. The structure shows a central Boron (B) atom coordinated to a Nitrogen (N) atom, two Oxygen (O) atoms, and a Carbon (C) atom. The Carbon atom is part of a ring system that includes a Chlorine (Cl) atom. A benzene ring is attached to the Nitrogen atom.</p> <p>SEBPIZ</p>          | 1.684 | [19] |  <p>ORTEP diagram of PAPVEI. The structure shows a central Iron (Fe) atom coordinated to a Boron (B) atom, two Oxygen (O) atoms, and a Carbon (C) atom. The Boron atom is part of a ring system that includes a Nitrogen (N) atom. The Carbon atom is part of a ring system that includes a Hydrogen (H) atom.</p> <p>PAPVEI</p> | 1.735 | [20] |
|  <p>ORTEP diagram of PUTBUB. The structure shows a central Boron (B) atom coordinated to a Nitrogen (N) atom, two Oxygen (O) atoms, and a Carbon (C) atom. The Carbon atom is part of a ring system that includes a Hydrogen (H) atom. The Boron atom is also coordinated to a Hydrogen (H) atom.</p> <p>PUTBUB</p> | 1.657 | [21] |  <p>ORTEP diagram of GEKCUU. The structure shows a central Boron (B) atom coordinated to a Nitrogen (N) atom, two Oxygen (O) atoms, and a Carbon (C) atom. The Carbon atom is part of a ring system that includes a Hydrogen (H) atom. The Boron atom is also coordinated to a Hydrogen (H) atom.</p> <p>GEKCUU</p>              | 1.698 | [22] |

### 3. Structural and multipole refinement details for 1

**Table 2S.** Crystal data for compound **1**.

|                                                                 |                                                                   |
|-----------------------------------------------------------------|-------------------------------------------------------------------|
| Formula                                                         | C <sub>14</sub> H <sub>20</sub> BF <sub>2</sub> NO <sub>2</sub>   |
| Molecular mass                                                  | 283.12 a.u.                                                       |
| Measurement temperature ( <i>T</i> )                            | 90(2) K                                                           |
| Crystal system                                                  | orthorhombic                                                      |
| Space group                                                     | P2 <sub>1</sub> /n                                                |
| Unit cell parameters:                                           |                                                                   |
| <i>a</i>                                                        | 6.6681(2) Å                                                       |
| <i>b</i>                                                        | 21.4324(6) Å                                                      |
| <i>c</i>                                                        | 9.8980(3) Å                                                       |
| $\alpha$                                                        | 90°                                                               |
| $\beta$                                                         | 102.551(2)°                                                       |
| $\gamma$                                                        | 90°                                                               |
| Volume ( <i>V</i> )                                             | 1380.75(7) Å <sup>3</sup>                                         |
| <i>Z</i>                                                        | 4                                                                 |
| Calculated density                                              | 1.362 g·cm <sup>-3</sup>                                          |
| <i>F</i> (000)                                                  | 600                                                               |
| Crystal size                                                    | 0.38 × 0.37 × 0.10 mm <sup>3</sup>                                |
| $\theta$ range for data collection                              | 2.312° ÷ 52.324°                                                  |
| Absorption coefficient ( $\mu_{\text{abs}}$ )                   | 0.107 mm <sup>-1</sup>                                            |
| ( $\sin \theta_{\text{max}}$ ) / $\lambda$                      | 1.12 Å <sup>-1</sup>                                              |
| Index ranges                                                    | -14 < <i>h</i> < 14<br>-47 < <i>k</i> < 47<br>-19 < <i>l</i> < 22 |
| No. of reflections collected / unique                           | 123017 / 15927                                                    |
| Completeness                                                    | > 99%                                                             |
| <i>R</i> <sub>int</sub>                                         | 4.4 %                                                             |
| Absorption correction                                           | multi-scan                                                        |
| <b><i>IAM refinement</i></b>                                    |                                                                   |
| No. reflections / restraints / parameters                       | 15927 / 0 / 181                                                   |
| Goof                                                            | 1.110                                                             |
| <i>R</i> 1 / <i>wR</i> 2 (for <i>I</i> > 3σ( <i>I</i> ))        | 3.84% / 11.38%                                                    |
| <i>R</i> 1 / <i>wR</i> 2 (for all data)                         | 5.64% / 13.04%                                                    |
| Largest residual density peak and hole                          | +0.637 e·Å <sup>-3</sup> / -0.628 e·Å <sup>-3</sup>               |
| <b><i>Multipole refinement</i></b>                              |                                                                   |
| No. of reflections (for <i>I</i> > 3σ( <i>I</i> )) / parameters | 11742 / 870 = 13.50                                               |
| <i>R</i> 1 / <i>wR</i> 1 (for <i>I</i> > 3σ( <i>I</i> ))        | 1.97% / 2.57%                                                     |
| <i>R</i> 2 / <i>wR</i> 2 (for <i>I</i> > 3σ( <i>I</i> ))        | 2.21% / 4.79%                                                     |
| <i>Goof</i> (for <i>I</i> > 3σ( <i>I</i> ))                     | 1.191                                                             |
| Largest residual density peak and hole                          | +0.164 e·Å <sup>-3</sup> / -0.145 e·Å <sup>-3</sup>               |

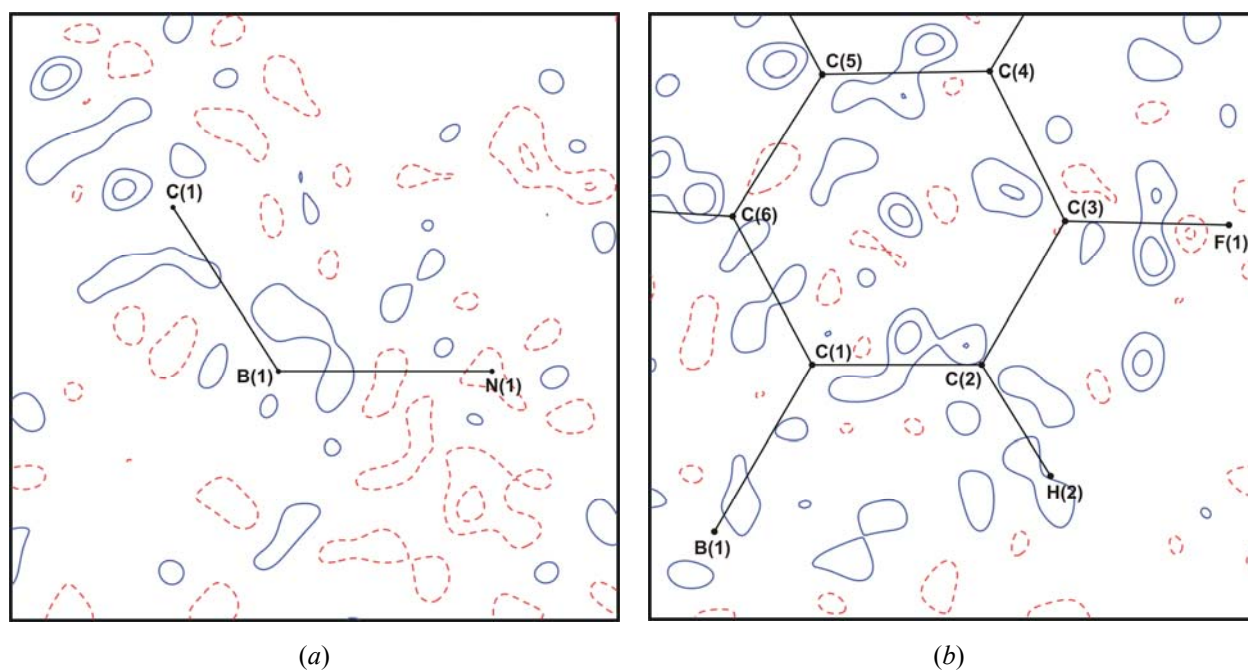

**Figure 1S.** Residual density maps in (a) B(1)N(1)C(1) and (b) C(1)C(2)C(3) planes. Blue solid lines denote positive values and red dashed lines to the negative ones. Contours at  $\pm 0.05 \cdot n \text{ e} \cdot \text{\AA}^{-5}$  ( $n = 1, 2, \dots$ ).

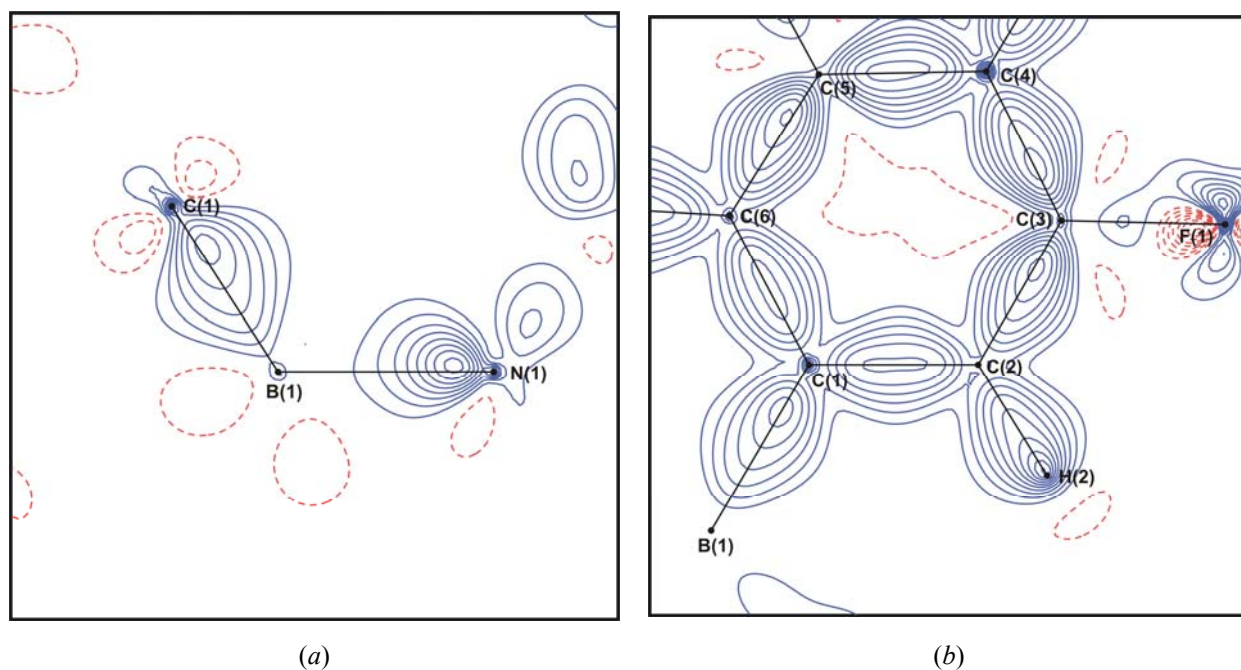

**Figure 2S.** Experimental static deformation density maps in (a) B(1)N(1)C(1) and (b) C(1)C(2)C(3) planes calculated by taking into account neighbouring molecules in the crystal lattice. Blue solid lines denote positive values and red dashed lines to the negative ones. Contours at  $\pm 0.1 \cdot n \text{ e} \cdot \text{\AA}^{-5}$  ( $n = 1, 2, \dots$ ). Note that there is positive deformation density along the C(3)–F(1) bond.



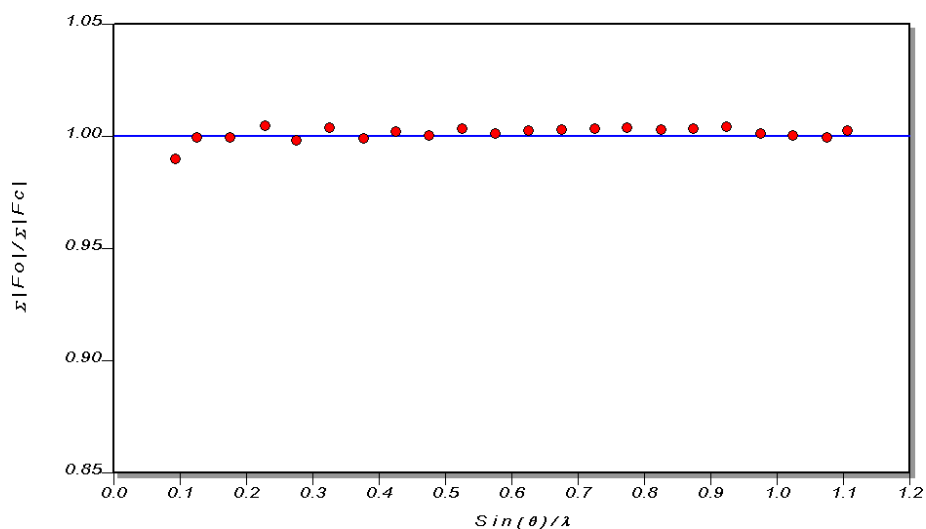

**Figure 3S.** Averaged plot showing the  $|F_o| / |F_c|$  versus resolution.  $F_o$  and  $F_c$  stand for observed and calculated structure factors, respectively.

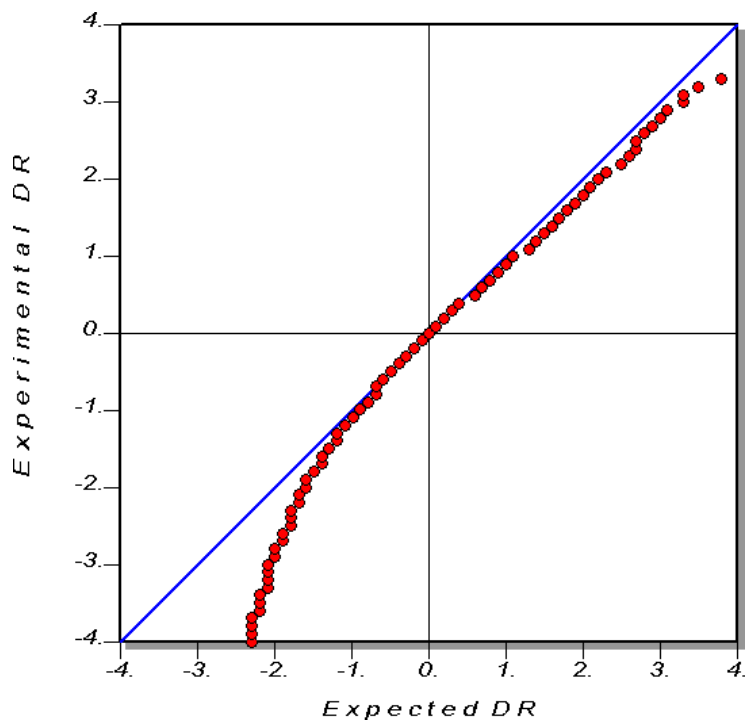

**Figure 4S.** Normal probability plot.

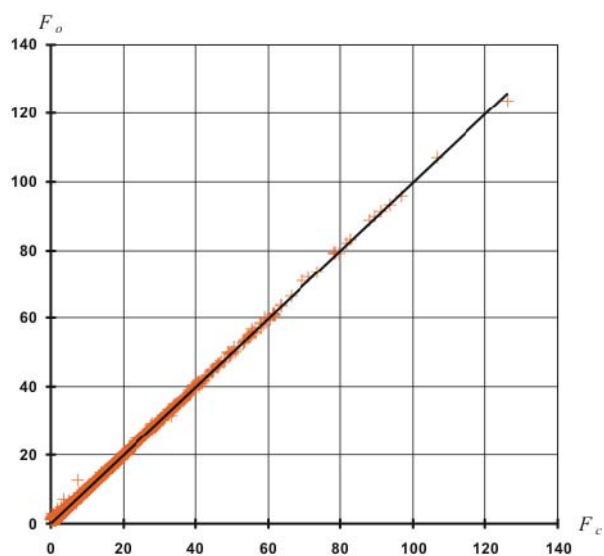

**Figure 5S.** The plot of  $F_o$  versus  $F_c$ . The straight line represents the fitted linear function ( $R^2 = 0.9992$ ;  $F_o = 0.9976 \cdot F_c + 0.0329$ ).

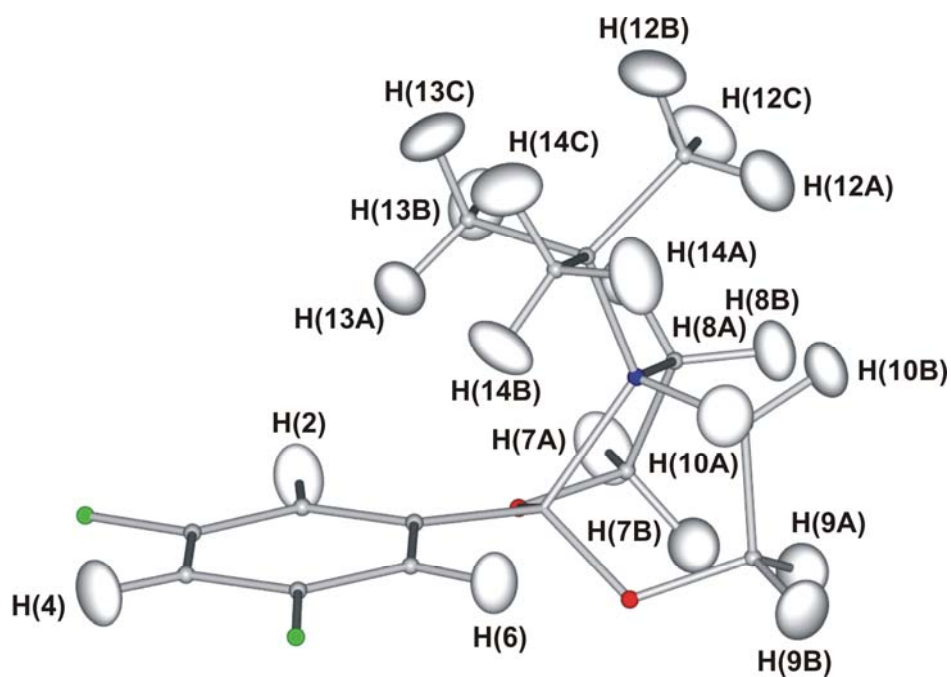

**Figure 6S.** Estimated (SHADE2) ADPs for hydrogen atoms (ellipsoids are drawn at 60% probability).

**Table 3S.** Minima and maxima of residual electron density.

| <i>Highest peaks</i> | <i>Height / e·Å<sup>-3</sup></i> | <i>Remarks</i>    |
|----------------------|----------------------------------|-------------------|
| 1                    | +0.16                            | 0.51 Å from C(14) |
| 2                    | +0.13                            | 0.37 Å from C(5)  |
| 3                    | +0.13                            | Random position   |
| 4                    | +0.13                            | 0.64 Å from C(2)  |
| 5                    | +0.13                            | 0.74 Å from C(6)  |
| 6                    | +0.13                            | Random position   |
| 7                    | +0.13                            | Random position   |
| 8                    | +0.12                            | Random position   |
| 9                    | +0.12                            | Random position   |
| 10                   | +0.12                            | Random position   |
| <i>Deepest holes</i> | <i>Height / e·Å<sup>-3</sup></i> | <i>Remarks</i>    |
| 1                    | -0.15                            | Random position   |
| 2                    | -0.14                            | 0.48 Å from C(8)  |
| 3                    | -0.13                            | 0.39 Å from C(14) |
| 4                    | -0.13                            | Random position   |
| 5                    | -0.12                            | 0.45 Å from C(13) |
| 6                    | -0.12                            | Random position   |
| 7                    | -0.12                            | Random position   |
| 8                    | -0.12                            | 0.36 Å from F(2)  |
| 9                    | -0.11                            | Random position   |
| 10                   | -0.11                            | Random position   |

**Table 4S.** Geometrical ( $d$  – distance) and topological parameters ( $\rho$  – electron density,  $L$  – negative Laplacian of electron density,  $\varepsilon$  – ellipticity) in BCPs for (a) isolated molecule with electron density constructed from monopole populations, (b) theoretical for isolated molecule with experimental geometry and (c) theoretically optimised structure. The values for crystalline state are the same as for (a) in respect do experimental error. Values in square brackets stand for RCPs.

| Bond         | (a) Closed form |                                         |                                      |               | (b) Closed form                         |                                     |               | (c) Open form  |                                         |                                      |               |
|--------------|-----------------|-----------------------------------------|--------------------------------------|---------------|-----------------------------------------|-------------------------------------|---------------|----------------|-----------------------------------------|--------------------------------------|---------------|
|              | $d / \text{Å}$  | $\rho(r_{BCP}) / e \cdot \text{Å}^{-3}$ | $L(r_{BCP}) / e \cdot \text{Å}^{-5}$ | $\varepsilon$ | $\rho(r_{BCP}) / e \cdot \text{Å}^{-3}$ | $L(r_{CP}) / e \cdot \text{Å}^{-5}$ | $\varepsilon$ | $d / \text{Å}$ | $\rho(r_{BCP}) / e \cdot \text{Å}^{-3}$ | $L(r_{BCP}) / e \cdot \text{Å}^{-5}$ | $\varepsilon$ |
| B(1)...N(1)  | 1.7646(3)       | 0.76(2)                                 | 4.36(8)                              | 0.07          | 0.658                                   | 0.853                               | 0.18          | [2.7870]       | [0.110]                                 | [1.147]                              | –             |
| B(1)–C(1)    | 1.6134(3)       | 1.16(2)                                 | 6.2(1)                               | 0.05          | 1.150                                   | 3.758                               | 0.05          | 1.5800         | 1.234                                   | 4.103                                | 0.04          |
| B(1)–O(1)    | 1.4428(3)       | 1.26(2)                                 | –6.6(1)                              | 0.11          | 1.131                                   | –18.252                             | 0.08          | 1.3750         | 1.296                                   | –25.932                              | 0.07          |
| B(1)–O(2)    | 1.4544(3)       | 1.21(2)                                 | –5.7(1)                              | 0.05          | 1.090                                   | –17.067                             | 0.13          | 1.3761         | 1.289                                   | –25.794                              | 0.08          |
| N(1)–C(8)    | 1.5099(3)       | 1.60(2)                                 | 8.06(9)                              | 0.06          | 1.616                                   | 12.334                              | 0.03          | 1.4586         | 1.804                                   | 15.996                               | 0.06          |
| N(1)–C(10)   | 1.4963(3)       | 1.69(2)                                 | 11.14(9)                             | 0.11          | 1.661                                   | 13.306                              | 0.03          | 1.4568         | 1.808                                   | 16.152                               | 0.06          |
| N(1)–C(11)   | 1.5374(3)       | 1.55(2)                                 | 8.14(8)                              | 0.08          | 1.521                                   | 10.719                              | 0.02          | 1.5007         | 1.645                                   | 12.925                               | 0.05          |
| C(3)–F(1)    | 1.3567(4)       | 1.93(3)                                 | 16.8(1)                              | 0.12          | 1.645                                   | –0.753                              | 0.09          | 1.3627         | 1.629                                   | 0.371                                | 0.07          |
| C(5)–F(2)    | 1.3502(4)       | 1.98(3)                                 | 22.6(2)                              | 0.20          | 1.666                                   | –1.655                              | 0.08          | 1.3627         | 1.629                                   | 0.370                                | 0.07          |
| C(1)–C(2)    | 1.4027(3)       | 2.08(2)                                 | 17.07(8)                             | 0.06          | 2.025                                   | 17.174                              | 0.17          | 1.4078         | 2.008                                   | 16.995                               | 0.16          |
| C(2)–C(3)    | 1.3826(3)       | 2.24(3)                                 | 21.88(9)                             | 0.22          | 2.142                                   | 19.698                              | 0.26          | 1.3886         | 2.116                                   | 19.187                               | 0.26          |
| C(3)–C(4)    | 1.3842(3)       | 2.30(3)                                 | 23.15(9)                             | 0.19          | 2.129                                   | 19.294                              | 0.28          | 1.3918         | 2.099                                   | 18.758                               | 0.27          |
| C(4)–C(5)    | 1.3870(3)       | 2.24(3)                                 | 21.26(9)                             | 0.10          | 2.119                                   | 19.104                              | 0.28          | 1.3917         | 2.099                                   | 18.761                               | 0.27          |
| C(5)–C(6)    | 1.3853(3)       | 2.22(3)                                 | 20.47(9)                             | 0.25          | 2.129                                   | 19.409                              | 0.27          | 1.3887         | 2.116                                   | 19.183                               | 0.26          |
| C(6)–C(1)    | 1.4018(3)       | 2.10(2)                                 | 18.14(8)                             | 0.08          | 2.028                                   | 17.267                              | 0.17          | 1.4077         | 2.009                                   | 17.003                               | 0.16          |
| C(7)–C(8)    | 1.5304(4)       | 1.76(2)                                 | 13.39(7)                             | 0.03          | 1.676                                   | 13.404                              | 0.05          | 1.5502         | 1.615                                   | 12.631                               | 0.07          |
| C(9)–C(10)   | 1.5159(4)       | 1.79(2)                                 | 14.26(8)                             | 0.12          | 1.723                                   | 14.098                              | 0.05          | 1.5411         | 1.643                                   | 13.019                               | 0.07          |
| O(1)–C(7)    | 1.4101(3)       | 1.93(3)                                 | 16.85(12)                            | 0.11          | 1.783                                   | 13.918                              | 0.02          | 1.4204         | 1.663                                   | 10.416                               | 0.01          |
| O(2)–C(9)    | 1.4121(3)       | 1.91(3)                                 | 15.37(12)                            | 0.04          | 1.768                                   | 13.624                              | 0.01          | 1.4225         | 1.653                                   | 10.265                               | 0.01          |
| C(11)–C(12)  | 1.5353(3)       | 1.69(3)                                 | 10.65(7)                             | 0.03          | 1.645                                   | 12.835                              | 0.02          | 1.5437         | 1.621                                   | 12.502                               | 0.02          |
| C(11)–C(13)  | 1.5341(4)       | 1.64(2)                                 | 10.55(7)                             | 0.19          | 1.644                                   | 12.896                              | 0.02          | 1.5429         | 1.622                                   | 12.623                               | 0.02          |
| C(11)–C(14)  | 1.5328(3)       | 1.67(2)                                 | 10.61(7)                             | 0.02          | 1.642                                   | 12.826                              | 0.02          | 1.5423         | 1.622                                   | 12.616                               | 0.02          |
| C(2)–H(2)    | 0.950           | 1.94(5)                                 | 21.50(20)                            | 0.05          | 1.907                                   | 25.751                              | 0.02          | 1.088          | 1.889                                   | 25.381                               | 0.02          |
| C(4)–H(4)    | 0.950           | 1.90(5)                                 | 19.79(22)                            | 0.03          | 1.887                                   | 25.399                              | 0.02          | 1.086          | 1.874                                   | 25.150                               | 0.02          |
| C(6)–H(6)    | 0.950           | 1.94(5)                                 | 20.88(20)                            | 0.04          | 1.900                                   | 25.356                              | 0.02          | 1.088          | 1.888                                   | 25.366                               | 0.02          |
| C(7)–H(7A)   | 0.990           | 1.92(5)                                 | 22.86(20)                            | 0.10          | 1.908                                   | 25.261                              | 0.03          | 1.098          | 1.897                                   | 24.998                               | 0.04          |
| C(7)–H(7B)   | 0.990           | 1.87(5)                                 | 17.80(21)                            | 0.02          | 1.915                                   | 25.071                              | 0.04          | 1.096          | 1.903                                   | 24.787                               | 0.04          |
| C(8)–H(8A)   | 0.990           | 1.89(5)                                 | 18.62(22)                            | 0.09          | 1.891                                   | 24.469                              | 0.03          | 1.109          | 1.816                                   | 22.203                               | 0.03          |
| C(8)–H(8B)   | 0.990           | 1.87(5)                                 | 19.30(22)                            | 0.04          | 1.910                                   | 25.026                              | 0.03          | 1.091          | 1.908                                   | 24.916                               | 0.02          |
| C(9)–H(9A)   | 0.990           | 1.87(5)                                 | 18.79(20)                            | 0.03          | 1.910                                   | 25.318                              | 0.04          | 1.098          | 1.896                                   | 25.021                               | 0.04          |
| C(9)–H(9B)   | 0.990           | 1.86(5)                                 | 17.56(21)                            | 0.09          | 1.908                                   | 24.766                              | 0.03          | 1.096          | 1.903                                   | 24.822                               | 0.05          |
| C(10)–H(10A) | 0.990           | 1.93(5)                                 | 20.55(21)                            | 0.04          | 1.910                                   | 25.120                              | 0.03          | 1.102          | 1.912                                   | 25.098                               | 0.02          |
| C(10)–H(10B) | 0.990           | 1.88(5)                                 | 18.25(23)                            | 0.02          | 1.893                                   | 24.543                              | 0.03          | 1.110          | 1.808                                   | 22.012                               | 0.03          |
| C(12)–H(12A) | 0.980           | 1.84(6)                                 | 15.36(28)                            | 0.06          | 1.983                                   | 26.719                              | 0.01          | 1.099          | 1.828                                   | 22.634                               | 0.01          |
| C(12)–H(12B) | 0.980           | 1.88(6)                                 | 19.31(21)                            | 0.05          | 1.980                                   | 26.805                              | 0.01          | 1.099          | 1.824                                   | 22.624                               | 0.01          |
| C(12)–H(12C) | 0.980           | 1.84(6)                                 | 15.95(26)                            | 0.03          | 1.985                                   | 26.793                              | 0.01          | 1.099          | 1.825                                   | 22.581                               | 0.01          |
| C(13)–H(13A) | 0.980           | 1.83(5)                                 | 17.45(26)                            | 0.12          | 2.001                                   | 27.657                              | 0.01          | 1.096          | 1.842                                   | 23.350                               | 0.01          |
| C(13)–H(13B) | 0.980           | 1.81(6)                                 | 14.75(30)                            | 0.14          | 1.978                                   | 26.473                              | 0.02          | 1.096          | 1.838                                   | 22.807                               | 0.01          |
| C(13)–H(13C) | 0.980           | 1.88(6)                                 | 20.35(23)                            | 0.08          | 1.977                                   | 26.605                              | 0.02          | 1.097          | 1.834                                   | 22.833                               | 0.01          |
| C(14)–H(14A) | 0.980           | 1.85(6)                                 | 17.70(25)                            | 0.06          | 1.983                                   | 26.619                              | 0.01          | 1.096          | 1.838                                   | 22.812                               | 0.01          |
| C(14)–H(14B) | 0.980           | 1.77(6)                                 | 14.31(28)                            | 0.08          | 2.000                                   | 27.686                              | 0.01          | 1.098          | 1.839                                   | 23.221                               | 0.01          |
| C(14)–H(14C) | 0.980           | 1.85(6)                                 | 18.26(22)                            | 0.07          | 1.983                                   | 26.844                              | 0.01          | 1.097          | 1.837                                   | 22.949                               | 0.01          |

## 4. Quantum-chemical calculations

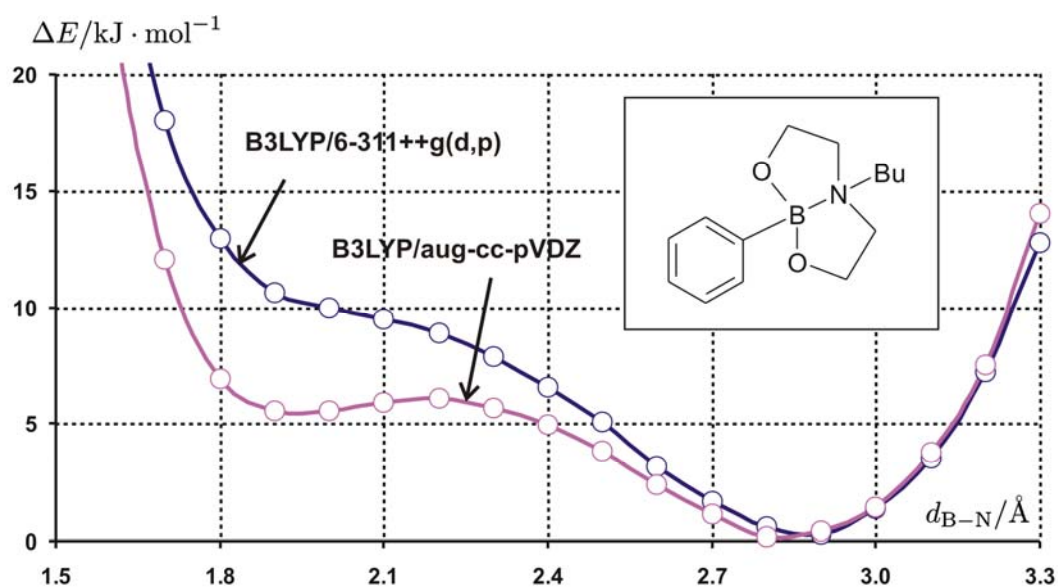

**Figure 7S.** Energy scan performed at DFT level of theory (B3LYP) with 6-311++G(*d,p*) and aug-cc-pVDZ basis sets for 6-butyl-2-phenyl-(*N-B*)-1,3,6,2-dioxazaborocane.

**Table S5.** Integrated atomic charges ( $Q$ ), dipole moments ( $\mu$ ) for (a) the isolated molecule with experimental geometry and (b) theoretically optimised structure.  $I$  stands for the integrated Lagrangian (compound **1**).

| Atom   | (a) Theoretical closed form |             |                                        | (b) Theoretical open form |             |                                        |
|--------|-----------------------------|-------------|----------------------------------------|---------------------------|-------------|----------------------------------------|
|        | $Q/e$                       | $\ \mu\ /D$ | $I/10^{-3}\cdot e\cdot\text{\AA}^{-2}$ | $Q/e$                     | $\ \mu\ /D$ | $I/10^{-3}\cdot e\cdot\text{\AA}^{-2}$ |
| F(1)   | -0.610                      | 0.367       | -0.24                                  | -0.604                    | 0.427       | -0.17                                  |
| F(2)   | -0.619                      | 0.430       | -0.24                                  | -0.603                    | 0.415       | -0.20                                  |
| O(1)   | -1.233                      | 0.793       | 0.88                                   | -1.284                    | 1.137       | -0.47                                  |
| O(2)   | -1.227                      | 0.708       | 1.03                                   | -1.283                    | 1.136       | -0.45                                  |
| N(1)   | -1.001                      | 0.887       | 0.78                                   | -0.948                    | 0.506       | -0.25                                  |
| B(1)   | +2.124                      | 0.332       | -1.03                                  | +2.196                    | 0.171       | -0.33                                  |
| C(1)   | -0.482                      | 2.597       | 0.96                                   | -0.555                    | 2.894       | 0.80                                   |
| C(2)   | +0.077                      | 0.580       | 0.65                                   | +0.091                    | 0.390       | 0.70                                   |
| C(3)   | +0.308                      | 1.222       | 0.41                                   | +0.302                    | 1.599       | 0.72                                   |
| C(4)   | +0.072                      | 0.528       | 0.20                                   | +0.076                    | 0.292       | 0.67                                   |
| C(5)   | +0.356                      | 1.604       | 0.20                                   | +0.416                    | 1.578       | 0.72                                   |
| C(6)   | +0.098                      | 0.467       | 0.62                                   | +0.176                    | 0.440       | 0.68                                   |
| C(7)   | +0.487                      | 1.022       | 0.59                                   | +0.508                    | 1.341       | 0.55                                   |
| C(8)   | +0.195                      | 0.726       | 0.69                                   | +0.195                    | 0.952       | 0.61                                   |
| C(9)   | +0.490                      | 0.830       | 0.47                                   | +0.512                    | 1.316       | 0.58                                   |
| C(10)  | +0.071                      | 0.728       | 0.22                                   | +0.091                    | 0.957       | 0.65                                   |
| C(11)  | +0.389                      | 0.764       | 0.71                                   | +0.436                    | 0.879       | 0.67                                   |
| C(12)  | -0.098                      | 0.180       | 0.59                                   | -0.077                    | 0.073       | 0.70                                   |
| C(13)  | -0.072                      | 0.288       | 0.44                                   | -0.085                    | 0.054       | 0.74                                   |
| C(14)  | -0.056                      | 0.187       | 0.61                                   | -0.061                    | 0.052       | 0.75                                   |
| H(2)   | +0.015                      | 0.457       | 0.04                                   | +0.054                    | 0.333       | 0.05                                   |
| H(4)   | +0.016                      | 0.437       | 0.03                                   | +0.063                    | 0.322       | 0.05                                   |
| H(6)   | +0.081                      | 0.401       | 0.06                                   | +0.057                    | 0.339       | 0.04                                   |
| H(7A)  | +0.011                      | 0.524       | 0.06                                   | +0.004                    | 0.365       | 0.03                                   |
| H(7B)  | +0.060                      | 0.477       | 0.08                                   | +0.019                    | 0.341       | 0.04                                   |
| H(8A)  | +0.062                      | 0.445       | 0.02                                   | +0.041                    | 0.402       | 0.04                                   |
| H(8B)  | +0.071                      | 0.383       | 0.06                                   | +0.002                    | 0.326       | 0.03                                   |
| H(9A)  | +0.012                      | 0.447       | 0.08                                   | +0.018                    | 0.340       | 0.04                                   |
| H(9B)  | +0.008                      | 0.484       | 0.07                                   | +0.004                    | 0.359       | 0.04                                   |
| H(10A) | +0.060                      | 0.444       | 0.03                                   | +0.000                    | 0.312       | 0.03                                   |
| H(10B) | +0.074                      | 0.412       | 0.20                                   | +0.042                    | 0.415       | 0.03                                   |
| H(12A) | +0.071                      | 0.457       | 0.03                                   | +0.033                    | 0.359       | 0.04                                   |
| H(12B) | +0.023                      | 0.485       | 0.03                                   | +0.023                    | 0.370       | 0.05                                   |
| H(12C) | +0.028                      | 0.414       | 0.06                                   | +0.028                    | 0.360       | 0.04                                   |
| H(13A) | +0.070                      | 0.450       | 0.05                                   | +0.001                    | 0.353       | 0.03                                   |
| H(13B) | +0.035                      | 0.452       | 0.07                                   | +0.034                    | 0.353       | 0.03                                   |
| H(13C) | +0.044                      | 0.442       | 0.08                                   | +0.025                    | 0.361       | 0.05                                   |
| H(14A) | +0.044                      | 0.467       | 0.05                                   | +0.028                    | 0.217       | 0.05                                   |
| H(14B) | +0.010                      | 0.435       | 0.06                                   | -0.004                    | 0.354       | 0.03                                   |
| H(14C) | +0.013                      | 0.432       | 0.06                                   | +0.013                    | 0.375       | 0.02                                   |

**Table 6S.** Cartesian coordinates for **1** used in theoretical calculations for (a) open and (b) closed form (the same as in XDPROP module).

| <i>Atom</i> | <i>Open form (a)</i> |              |              | <i>Closed form (b)</i> |              |              |
|-------------|----------------------|--------------|--------------|------------------------|--------------|--------------|
|             | <i>x / Å</i>         | <i>y / Å</i> | <i>z / Å</i> | <i>x / Å</i>           | <i>y / Å</i> | <i>z / Å</i> |
| F(1)        | 6.238983             | 1.007025     | 3.137831     | -7.982254              | -3.708353    | 0.010446     |
| F(2)        | 1.878625             | 1.580265     | 4.764697     | -8.080506              | 1.009569     | 0.011567     |
| O(1)        | 4.492944             | 4.539768     | 0.160444     | -3.042755              | -2.485699    | 0.067207     |
| O(2)        | 2.319277             | 5.101138     | 1.188576     | -3.091441              | -0.007598    | 0.077206     |
| N(1)        | 2.395003             | 3.726228     | -0.847620    | -1.898744              | -1.237344    | -2.154470    |
| B(1)        | 3.221638             | 4.085508     | 0.669366     | -3.660116              | -1.258650    | 0.005227     |
| C(1)        | 3.477322             | 2.970305     | 1.807066     | -5.239803              | -1.291213    | 0.010452     |
| C(2)        | 4.748807             | 2.397766     | 1.958548     | -5.931594              | -2.517300    | 0.010450     |
| C(3)        | 5.003198             | 1.555163     | 3.024748     | -7.320229              | -2.517300    | 0.010449     |
| C(4)        | 4.059203             | 1.239195     | 3.986564     | -8.078722              | -1.350392    | 0.010519     |
| C(5)        | 2.813718             | 1.827133     | 3.822481     | -7.369527              | -0.152972    | 0.010934     |
| C(6)        | 2.502327             | 2.670738     | 2.768783     | -5.982024              | -0.095108    | 0.010564     |
| C(7)        | 4.265549             | 5.302170     | -1.003755    | -1.652506              | -2.704322    | -0.125156    |
| C(8)        | 3.250211             | 4.500698     | -1.821636    | -1.206118              | -2.382381    | -1.574325    |
| C(9)        | 1.417077             | 5.612862     | 0.230288     | -1.731362              | 0.302931     | -0.200518    |
| C(10)       | 1.092127             | 4.441768     | -0.675602    | -1.382392              | 0.038833     | -1.678127    |
| C(11)       | 2.194251             | 2.282932     | -1.337311    | -2.216737              | -1.338516    | -3.617629    |
| C(12)       | 1.575529             | 2.296745     | -2.741802    | -0.937207              | -1.424560    | -4.476841    |
| C(13)       | 3.541029             | 1.550991     | -1.355730    | -3.100211              | -2.580407    | -3.858058    |
| C(14)       | 1.249642             | 1.515264     | -0.403793    | -3.046749              | -0.116015    | -4.059608    |
| H(2)        | 5.559803             | 2.622539     | 1.276835     | -5.392579              | -3.462299    | 0.013353     |
| H(4)        | 4.270995             | 0.560892     | 4.803863     | -9.166082              | -1.373055    | 0.011066     |
| H(6)        | 1.513240             | 3.109769     | 2.725997     | -5.482963              | 0.871612     | 0.013983     |
| H(7A)       | 5.207445             | 5.445339     | -1.537471    | -1.473734              | -3.770690    | 0.067071     |
| H(7B)       | 3.890483             | 6.295683     | -0.749353    | -1.069538              | -2.147216    | 0.617493     |
| H(8A)       | 2.622121             | 5.132015     | -2.453729    | -0.105579              | -2.249051    | -1.564523    |
| H(8B)       | 3.788980             | 3.777779     | -2.437742    | -1.411194              | -3.262733    | -2.185398    |
| H(9A)       | 1.829394             | 6.453747     | -0.331322    | -1.606069              | 1.375118     | 0.001312     |
| H(9B)       | 0.524196             | 5.974991     | 0.744201     | -1.059995              | -0.228963    | 0.483148     |
| H(10A)      | 0.379515             | 3.792292     | -0.162889    | -1.829203              | 0.842366     | -2.265146    |
| H(10B)      | 0.682220             | 4.714077     | -1.650397    | -0.280557              | 0.126528     | -1.782326    |
| H(12A)      | 0.653745             | 2.818074     | -2.746289    | -0.299957              | -0.542187    | -4.326492    |
| H(12B)      | 1.384894             | 1.303250     | -3.055195    | -1.190157              | -1.474649    | -5.544951    |
| H(12C)      | 2.238031             | 2.721622     | -3.450314    | -0.347698              | -2.318700    | -4.233480    |
| H(13A)      | 3.974743             | 1.529981     | -0.389936    | -3.985467              | -2.551626    | -3.210809    |
| H(13B)      | 4.280531             | 1.962165     | -1.992443    | -2.575311              | -3.526830    | -3.684344    |
| H(13C)      | 3.414993             | 0.550293     | -1.678824    | -3.434444              | -2.592637    | -4.903273    |
| H(14A)      | 0.246750             | 1.841095     | -0.500979    | -2.451322              | 0.801923     | -4.133004    |
| H(14B)      | 1.527061             | 1.616060     | 0.613202     | -3.883237              | 0.058547     | -3.370985    |
| H(14C)      | 1.297707             | 0.495862     | -0.686690    | -3.459742              | -0.304854    | -5.058137    |

**Table 7S.** Calculated relative energies of the B–N energy scans for the azaesters derivatives. Values in brackets stand for the B...N optimal distances of the open and closed forms of boronic azaesters. The energy of the most stable form is chosen as a reference point.

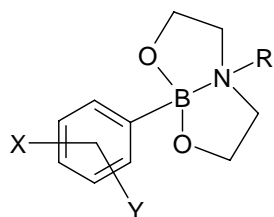

| $d(\text{B-N}) / \text{Å}$ | $\Delta E/\text{kJ}\cdot\text{mol}^{-1}$ |                   |                |                   |                               |                   |                   |
|----------------------------|------------------------------------------|-------------------|----------------|-------------------|-------------------------------|-------------------|-------------------|
|                            | $X, Y = \text{H}$                        |                   |                | $X, Y = \text{F}$ | $R = \text{Bu}, Y = \text{H}$ |                   |                   |
|                            | $R = \text{Bu}$                          | $R = \text{Bu}^*$ | $R = \text{H}$ | $R = \text{t-Bu}$ | $X = 2\text{-Br}$             | $X = 3\text{-Br}$ | $X = 4\text{-Br}$ |
| 1.5                        | 53.13                                    | 57.89             | 38.46          | 74.22             | 40.24                         | 47.73             | 45.99             |
| 1.6                        | 24.06                                    | 30.48             | 15.97          | 48.41             | 14.36                         | 21.00             | 19.42             |
| 1.7                        | 11.86                                    | 17.87             | 7.04           | 39.01             | 3.28                          | 8.31              | 9.12              |
| 1.8                        | 6.68                                     | 12.78             | 4.83           | 29.71             | 0.07                          | 4.16              | 5.08              |
| 1.9                        | 5.32                                     | 10.43             | 5.54           | 23.35             | 0.42                          | 3.61              | 4.13              |
| 2.0                        | 5.31                                     | 9.77              | 6.86           | 18.81             | 2.02                          | 3.61              | 4.52              |
| 2.1                        | 5.70                                     | 9.34              | 7.72           | 16.45             | 3.70                          | 4.47              | 5.06              |
| 2.2                        | 5.85                                     | 8.74              | 7.79           | 12.46             | 4.76                          | 4.73              | 5.33              |
| 2.3                        | 5.48                                     | 7.71              | 7.06           | 9.03              | 5.19                          | 4.62              | 5.05              |
| 2.4                        | 4.75                                     | 6.40              | 5.78           | 5.92              | 5.02                          | 4.10              | 4.40              |
| 2.5                        | 3.62                                     | 4.88              | 4.17           | 3.90              | 4.38                          | 3.14              | 3.33              |
| 2.6                        | 2.17                                     | 3.00              | 2.46           | 1.57              | 3.45                          | 1.84              | 1.96              |
| 2.7                        | 0.91                                     | 1.47              | 0.88           | 0.39              | 2.66                          | 0.72              | 0.77              |
| 2.8                        | 0.01                                     | 0.40              | 0.10           | 0.20              | 2.55                          | -0.07             | 0.00              |
| 2.9                        | 0.19                                     | 0.12              | 0.97           | 1.06              | 3.17                          | 0.10              | 0.06              |
| 3.0                        | 1.20                                     | 1.21              | 2.55           | 3.06              | 4.87                          | 1.52              | 1.40              |
| 3.1                        | 3.57                                     | 3.37              | 5.54           | 5.93              | 7.69                          | 4.04              | 3.90              |
| 3.2                        | 7.33                                     | 7.02              | 10.07          | 10.43             | 12.07                         | 8.02              | 7.80              |
| 3.3                        | 13.82                                    | 12.57             | 16.39          | 16.82             | 18.08                         | 13.96             | 13.64             |

\*B3LYP/6-311++G(d,p)



**Table 8S.** Topological parameters ( $\rho$  – electron density,  $L$  – negative Laplacian of electron density) at BCPs of boron-nitrogen dative bonds in **1** for all computed scan steps.

| $d(\text{B-N}) / \text{Å}$ | $\rho(r_{\text{BCP}}) / e \cdot \text{Å}^{-3}$ | $L(r_{\text{BCP}}) / e \cdot \text{Å}^{-5}$ | CP     |
|----------------------------|------------------------------------------------|---------------------------------------------|--------|
| 1.5                        | 1.103                                          | 14.755                                      | (3,-1) |
| 1.6                        | 0.895                                          | 7.946                                       | (3,-1) |
| 1.7                        | 0.738                                          | 2.942                                       | (3,-1) |
| 1.8                        | 0.619                                          | 0.067                                       | (3,-1) |
| 1.9                        | 0.521                                          | -0.269                                      | (3,-1) |
| 2.0                        | 0.436                                          | 0.494                                       | (3,-1) |
| 2.1                        | 0.364                                          | 1.035                                       | (3,-1) |
| 2.2                        | 0.303                                          | 1.304                                       | (3,-1) |
| 2.3                        | 0.253                                          | 1.389                                       | (3,-1) |
| 2.4                        | 0.211                                          | 1.380                                       | (3,-1) |
| 2.5                        | 0.178                                          | 1.329                                       | (3,-1) |
| 2.6                        | 0.150                                          | 1.271                                       | (3,-1) |
| 2.7                        | 0.127                                          | 1.202                                       | (3,-1) |
| 2.8                        | 0.107                                          | 1.118                                       | (3,-1) |
| 2.9                        | 0.091                                          | 1.039                                       | (3,+1) |
| 3.0                        | 0.078                                          | 0.967                                       | (3,+1) |
| 3.1                        | 0.067                                          | 0.902                                       | (3,+1) |
| 3.2                        | 0.058                                          | 0.849                                       | (3,+1) |
| 3.3                        | 0.051                                          | 0.839                                       | (3,+1) |

**Table 9S.** Topological parameters ( $\rho$  – electron density,  $L$  – negative Laplacian of electron density) at the BCPs of boron-nitrogen dative bonds for the closed forms of halide-substituted azaesters used in theoretical calculations together with associated B–N bond lengths.

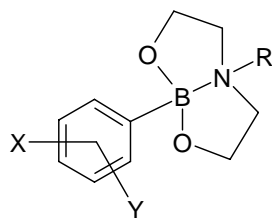

| R  | X,Y        | $d_{\text{B-N}} / \text{Å}$ | $\rho(r_{\text{BCP}}) / e \cdot \text{Å}^{-3}$ | $L(r_{\text{BCP}}) / e \cdot \text{Å}^{-5}$ |
|----|------------|-----------------------------|------------------------------------------------|---------------------------------------------|
| Bu | 4-Br, H    | 1.911                       | 0.513                                          | 0.190                                       |
| Bu | 3-Br, H    | 1.888                       | 0.534                                          | 0.315                                       |
| Bu | 2-Br, H    | 1.834                       | 0.590                                          | 0.352                                       |
| Bu | 4-F, H     | 1.907                       | 0.515                                          | 0.188                                       |
| Bu | 2-F, 3-F   | 1.809                       | 0.617                                          | 0.087                                       |
| Bu | 3-F, 4-F   | 1.876                       | 0.545                                          | 0.341                                       |
| Bu | 2-F, 5-F   | 1.804                       | 0.622                                          | 0.011                                       |
| Bu | 2-F, 4-F   | 1.815                       | 0.610                                          | 0.160                                       |
| Bu | 3-F, 5-F   | 1.864                       | 0.558                                          | 0.376                                       |
| Bu | 3-Cl, 5-Cl | 1.882                       | 0.541                                          | 0.367                                       |
| Bu | 2-Cl, 3-Cl | 1.821                       | 0.604                                          | 0.271                                       |
| Bu | H, H       | 1.930                       | 0.495                                          | -0.037                                      |
| H  | H, H       | 1.814                       | 0.593                                          | 0.340                                       |

**Table 10S.** The B–O and B–C bond lengths in **1**, as a function of the B...N distances for different scan steps – numerical values.

|              | $d(\text{B-N}) / \text{Å}$ | $d(\text{B-O})^* / \text{Å}$ | $d(\text{B-C}) / \text{Å}$ |
|--------------|----------------------------|------------------------------|----------------------------|
|              | 1.500                      | 1.487                        | 1.626                      |
|              | 1.600                      | 1.474                        | 1.624                      |
|              | 1.700                      | 1.462                        | 1.621                      |
|              | 1.800                      | 1.449                        | 1.614                      |
|              | 1.900                      | 1.436                        | 1.608                      |
|              | 2.000                      | 1.425                        | 1.601                      |
|              | 2.100                      | 1.414                        | 1.596                      |
|              | 2.200                      | 1.405                        | 1.592                      |
|              | 2.300                      | 1.397                        | 1.588                      |
|              | 2.400                      | 1.391                        | 1.585                      |
|              | 2.500                      | 1.385                        | 1.583                      |
|              | 2.600                      | 1.381                        | 1.582                      |
|              | 2.700                      | 1.378                        | 1.581                      |
|              | 2.800                      | 1.375                        | 1.580                      |
|              | 2.900                      | 1.374                        | 1.578                      |
|              | 3.000                      | 1.373                        | 1.577                      |
|              | 3.100                      | 1.373                        | 1.576                      |
|              | 3.200                      | 1.374                        | 1.575                      |
|              | 3.300                      | 1.375                        | 1.573                      |
| Closed form: | 1.764                      | 1.449                        | 1.614                      |
| Open form:   | 2.787                      | 1.376                        | 1.580                      |

\* mean value of B(1)–O(1) and B(1)–O(2)

**Table 11S.** Second-order perturbation theory analyses of the Kohn-Sham equations on NBO basis for compound **1** (ED – electron density together with the description of natural orbital hybrid of which NBO is composed,  $E_2$  energy of hyperconjugative interaction,  $E_j - E_i$  – energy difference between donor and acceptor  $i$  and  $j$  NBO orbitals,  $F_{ij}$  – Fock matrix element between  $i$ -th and  $j$ -th NBO orbitals, LP – lone electron pair, LP\* unfilled  $p$ -type orbital).

|                | Donor    | ED / e<br>Hybride                 | Acceptor  | ED / e<br>Hybride                | $E_2 /$<br>$\text{kJ}\cdot\text{mol}^{-1}$ | $E_j - E_i /$<br>a.u | $F_{ij} /$<br>a.u |
|----------------|----------|-----------------------------------|-----------|----------------------------------|--------------------------------------------|----------------------|-------------------|
| Closed<br>form | O(1) LP2 | 1.875<br>s (0.01%)<br>p (99.78%)  | B(1) LP1* | 0.352<br>s (1.13%)<br>p (98.67%) | 14.75                                      | 0.40                 | 0.073             |
|                | O(2) LP2 | 1.886<br>s (0.01%)<br>p (99.78%)  |           |                                  | 15.58                                      | 0.40                 | 0.075             |
|                | N(1) LP1 | 1.701<br>s (16.26%)<br>p (83.70%) |           |                                  | 54.3                                       | 0.50                 | 0.149             |
| Open<br>form   | O(1) LP2 | 1.822<br>s (0.70%)<br>p (99.14%)  | B(1) LP1* | 0.372<br>s (5.29%)<br>p (94.69%) | 46.09                                      | 0.35                 | 0.119             |
|                | O(2) LP2 | 1.819<br>s (0.49%)<br>p (99.35%)  |           |                                  | 46.68                                      | 0.35                 | 0.120             |
|                | N(1) LP1 | 1.843<br>s (9.93%)<br>p (90.02%)  |           |                                  | 2.96                                       | 0.30                 | 0.028             |

**Table 12S.** Different dipole moments for the closed and open forms of **1** ( $\|\mu\|$  denotes the magnitude of the dipole moment). Values in square brackets next to the dipole moment magnitudes denote the dipole moment enhancements in crystalline state in respect to the dipole moment for the isolated molecule ( $[x]_A = (\mu - \mu_A) \cdot 100\% / \mu_A$ ), given in subscript.

| Dipole moment | Closed form                 | $\ \mu\  / D$<br>Open form | Remarks                                                                                                                                       |
|---------------|-----------------------------|----------------------------|-----------------------------------------------------------------------------------------------------------------------------------------------|
| <b>B1</b>     | 8.64                        | –                          | Integrated dipole moment over the whole molecule (sum over atomic contributions) – experimental data (isolated molecule)                      |
| <b>B2</b>     | 8.83 [2.2%] <sub>B1</sub>   | –                          | Integrated dipole moment over the whole molecule (sum over atomic contributions) – experimental data (molecule in a crystal)                  |
| <b>B3</b>     | 13.26                       | 3.75                       | Integrated dipole moment over the whole molecule (sum over atomic contributions) – theoretical data from DFT calculations (isolated molecule) |
| <b>M1</b>     | 8.71                        | –                          | Dipole moment calculated directly from the multipole populations (isolated molecule)                                                          |
| <b>M2</b>     | 9.59 [10.1%] <sub>M1</sub>  | –                          | Dipole moment calculated directly from the multipole populations (molecule in a crystal)                                                      |
| <b>E1</b>     | 8.99                        | 5.98                       | Theoretically calculated dipole moment at Hartree-Fock level (isolated molecule)                                                              |
| <b>E2</b>     | 11.55 [28.5%] <sub>E1</sub> | –                          | Estimated dipole moment at Hartree-Fock level using Spackman's iterative approach <sup>[20]</sup> (molecule in a crystal)                     |

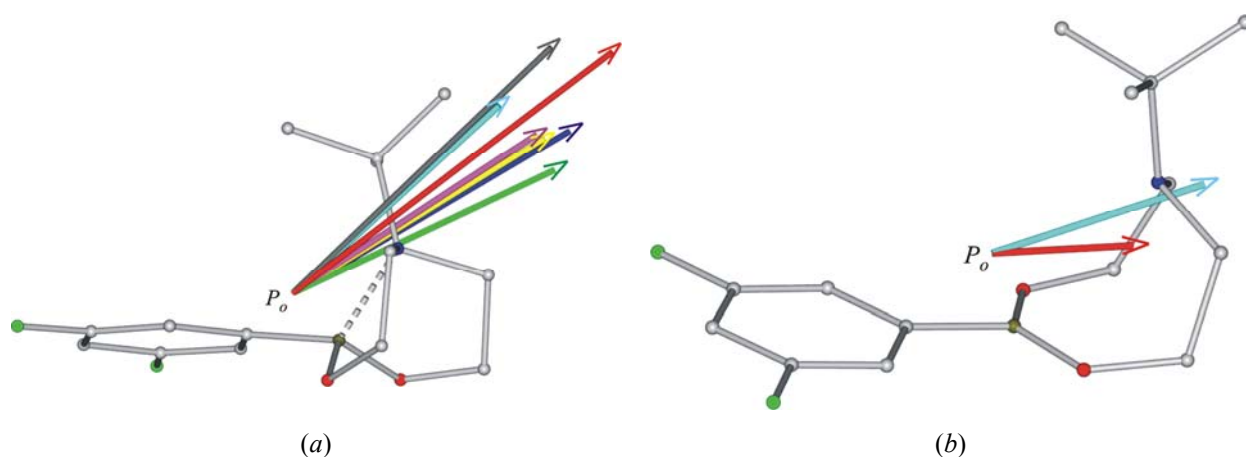

**Figure 8S.** Total dipole moments of **1** anchored approximately at the geometric centre of the molecule for (a) closed and (b) open forms of **1**. Colour coding for the values from Table 13S: **B1** – green, **B2** – yellow, **B3** – red, **M1** – magenta, **M2** – blue, **E1** – cyan, **E2** – grey ( $P_o$  – geometric centre); atomic colours are the same as in Figure 1.

## 5. VT NMR studies

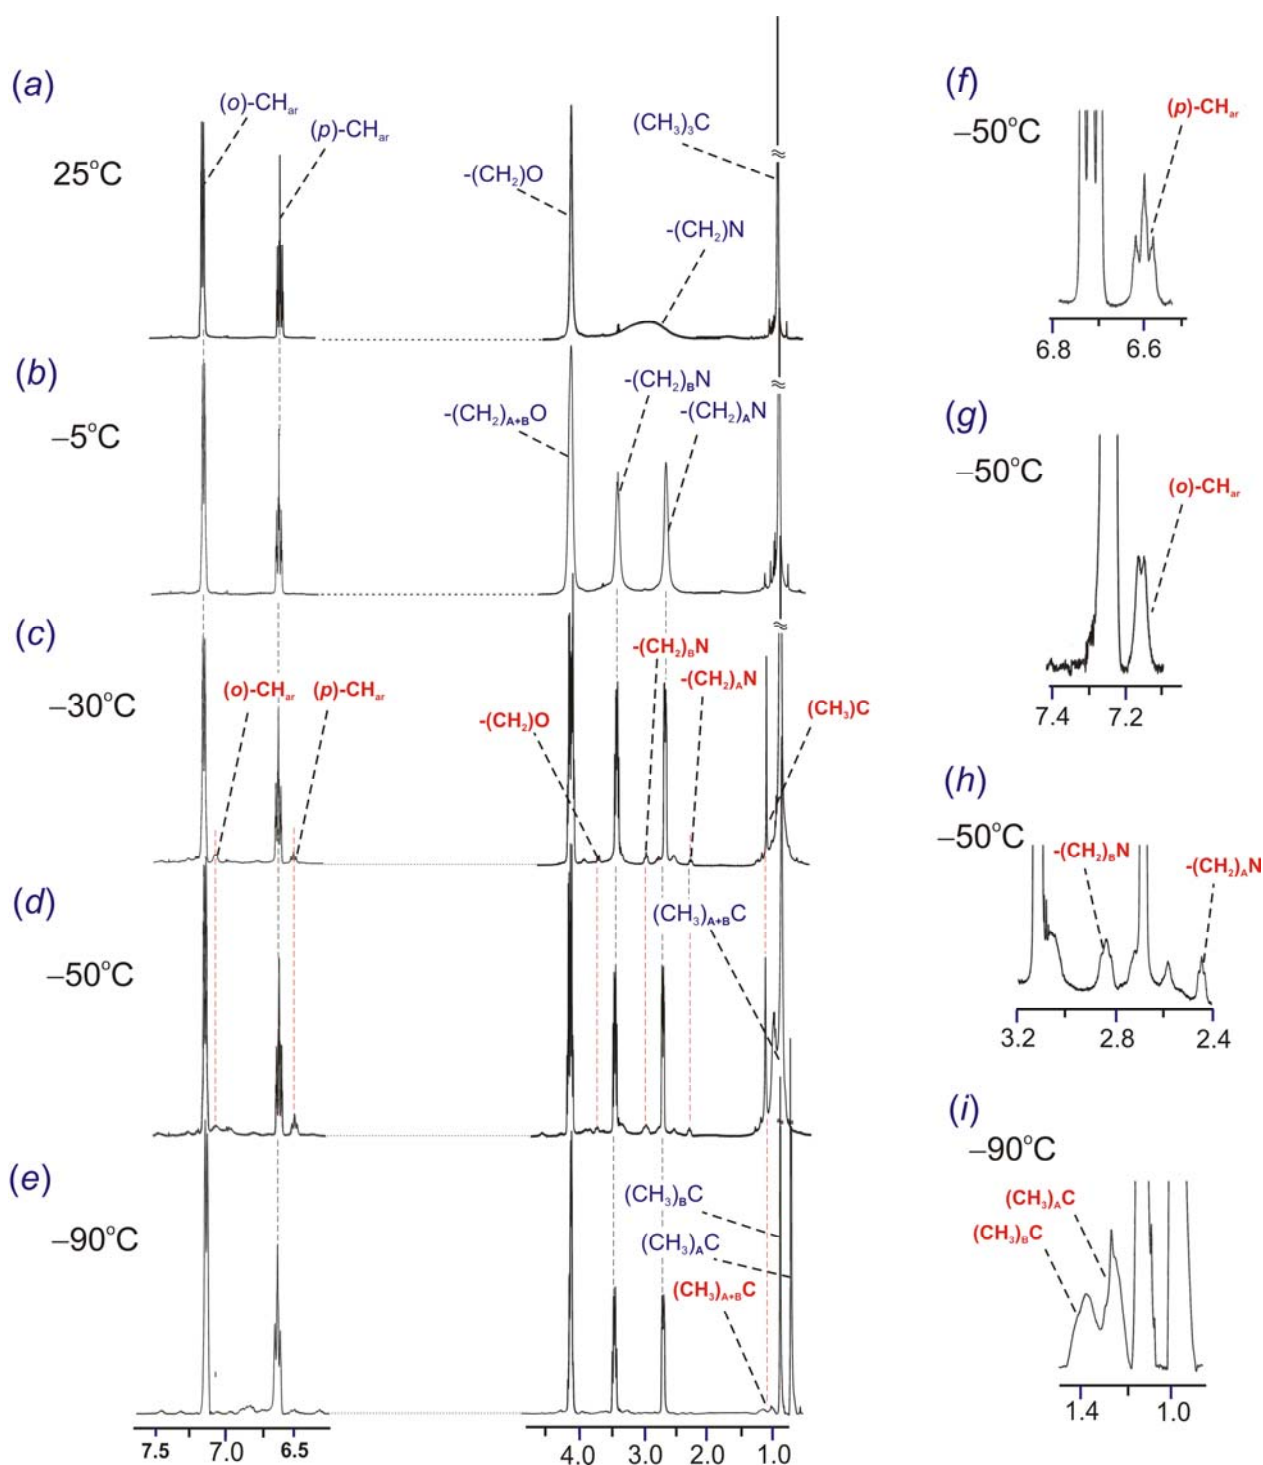

**Figure 9S.**  $^1\text{H}$  NMR spectra (500 MHz) for a solution of **1** in  $\text{CD}_2\text{Cl}_2$  taken at five different temperatures: (a) 25°C, (b) -5°C, (c) -30°C, (d) -50°C and (e) -90°C; (f–i) more detailed view of some selected parts of the NMR spectra. Peaks of the closed and open forms have been assigned in blue and red colours, respectively.

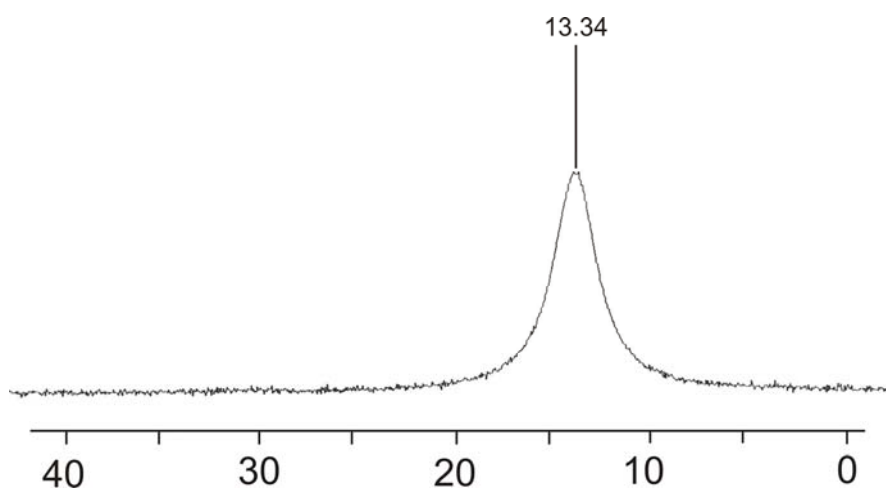

**Figure 10S.**  $^{11}\text{B}$  NMR spectrum of **1** in the solution of  $\text{CD}_2\text{Cl}_2$  recorded at room temperature ( $T = 25^\circ\text{C}$ ).

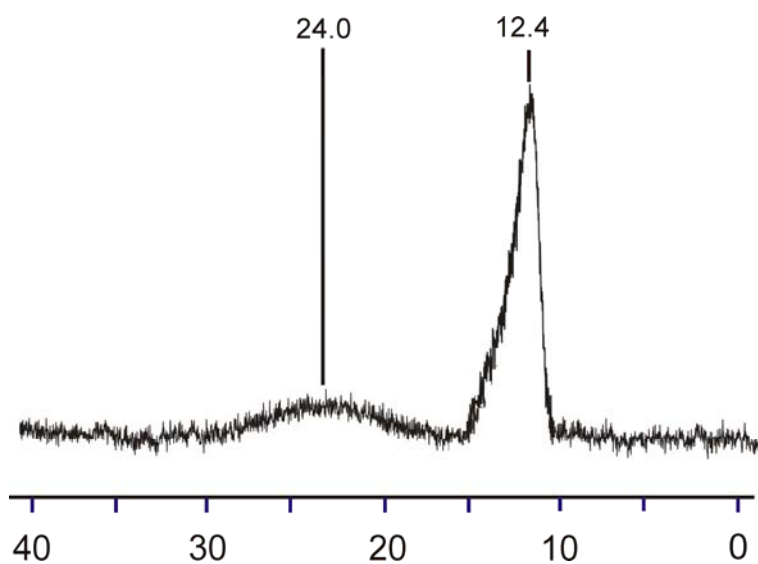

**Figure 11S.**  $^{11}\text{B}$  NMR spectrum of the closed (12.41 ppm) and open (24.07 ppm) forms of **1** in the solution of  $\text{CD}_2\text{Cl}_2$  recorded at  $-50^\circ\text{C}$ .

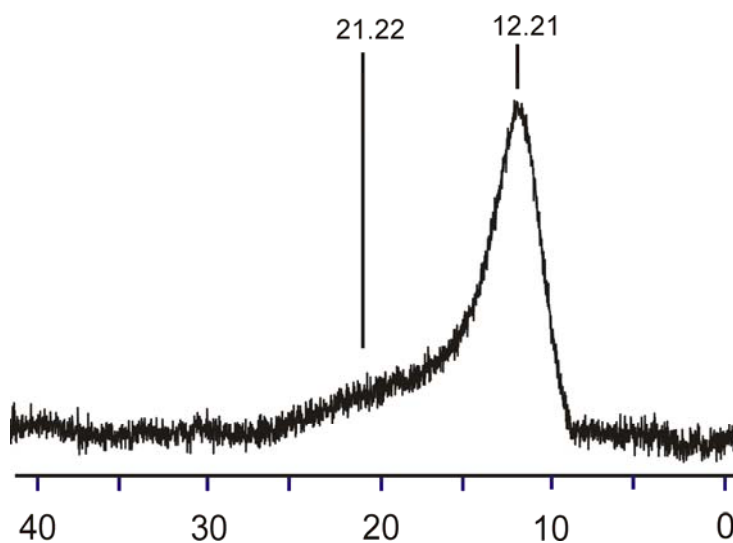

**Figure 12S.**  $^{11}\text{B}$  NMR spectrum of the closed (12.24 ppm) and open (23.89 ppm) forms of **1** in the solution of  $\text{CD}_2\text{Cl}_2$  recorded at  $-90^\circ\text{C}$ .

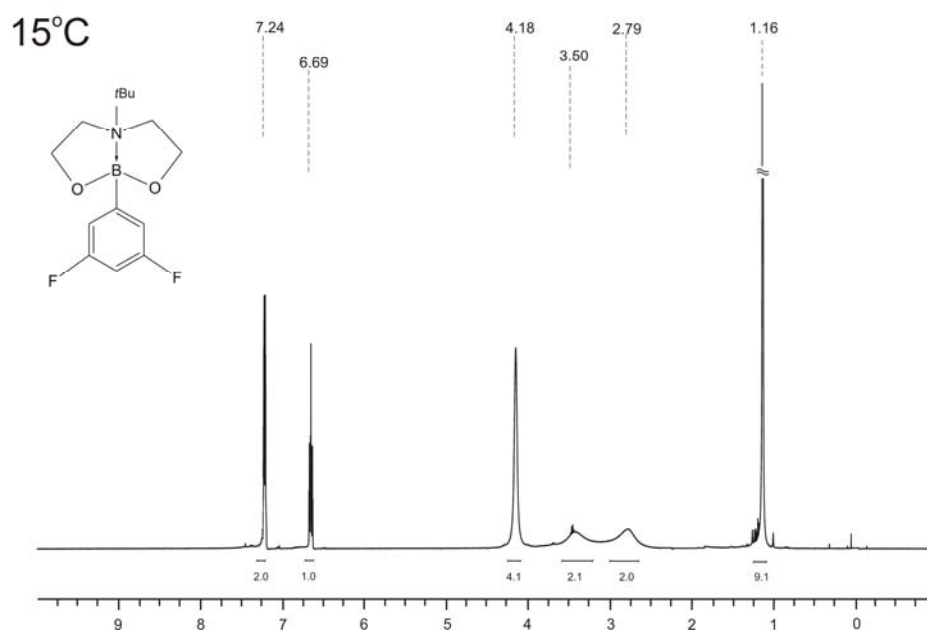

**Figure 13S.**  $^1\text{H}$  NMR spectra of **1** in the solution of  $\text{CD}_2\text{Cl}_2$  recorded at 15°C.

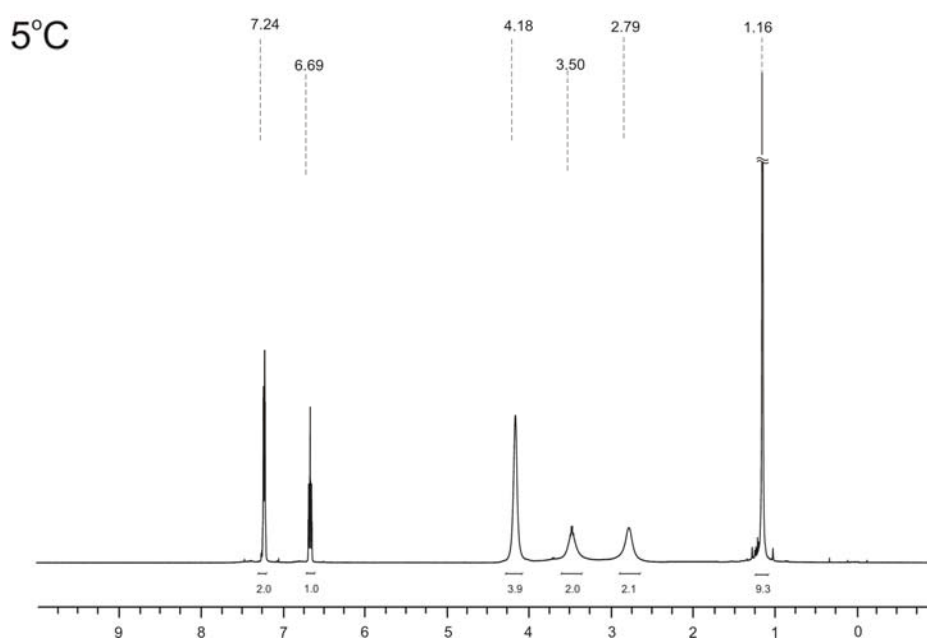

**Figure 14S.**  $^1\text{H}$  NMR spectrum of **1** in the solution of  $\text{CD}_2\text{Cl}_2$  recorded at 5°C.

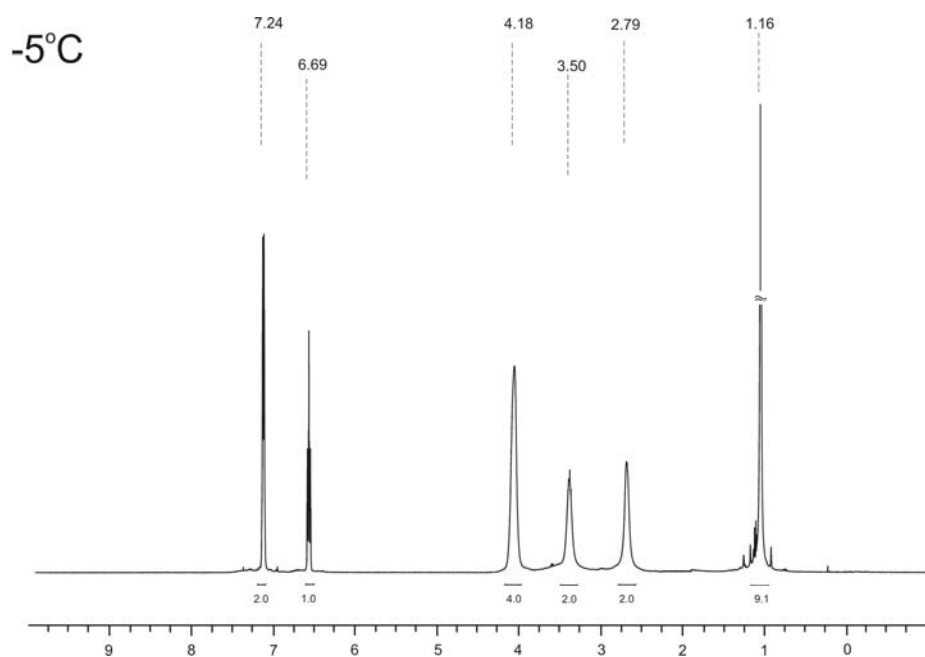

**Figure 15S.**  $^1\text{H}$  NMR spectra of **1** in the solution of  $\text{CD}_2\text{Cl}_2$  recorded at  $-5^{\circ}\text{C}$ .

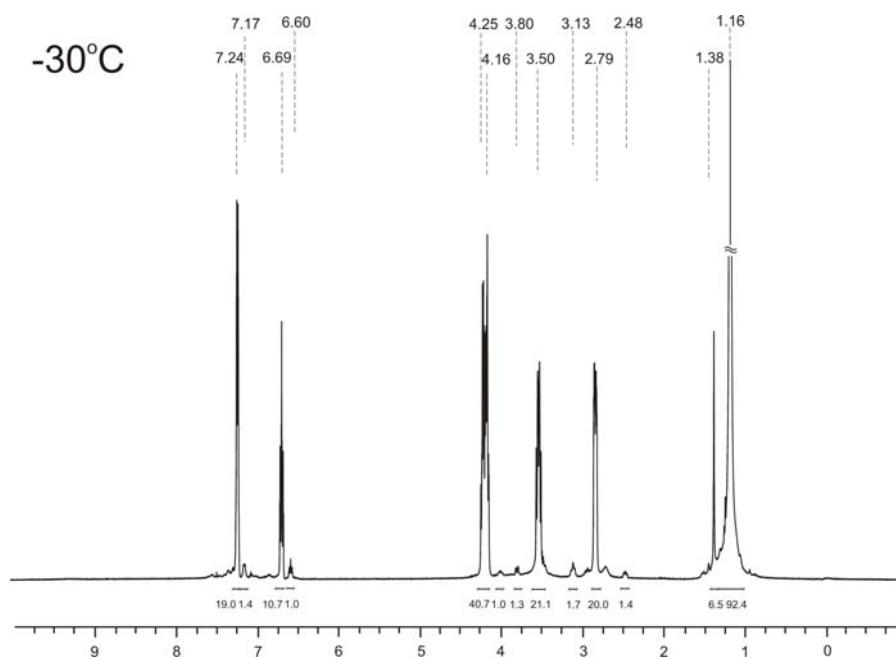

**Figure 16S.**  $^1\text{H}$  NMR spectra of **1** in the solution of  $\text{CD}_2\text{Cl}_2$  recorded at  $-30^{\circ}\text{C}$ .



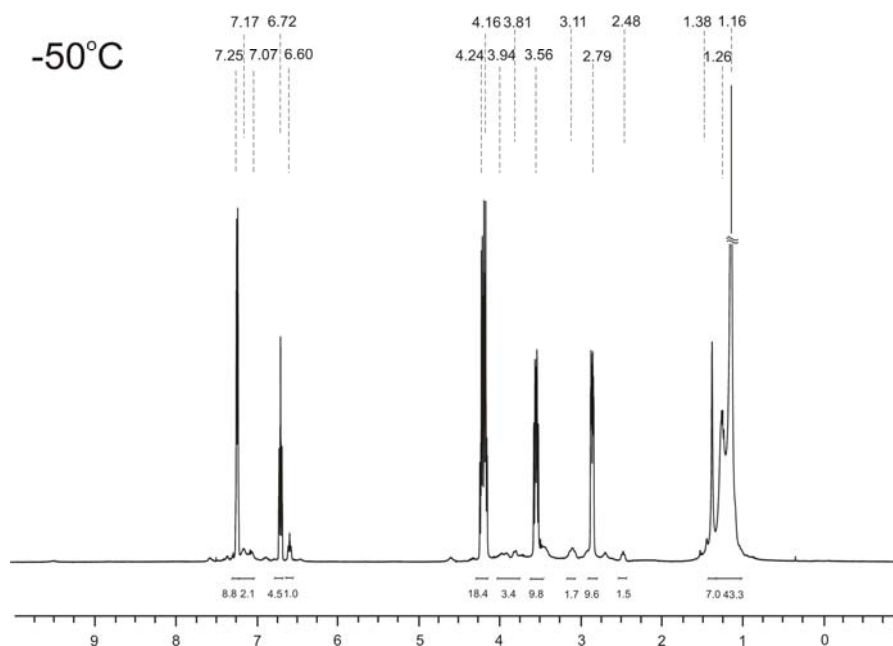

**Figure 17S.**  $^1\text{H}$  NMR spectra of **1** in the solution of  $\text{CD}_2\text{Cl}_2$  recorded at  $-50^\circ\text{C}$ .

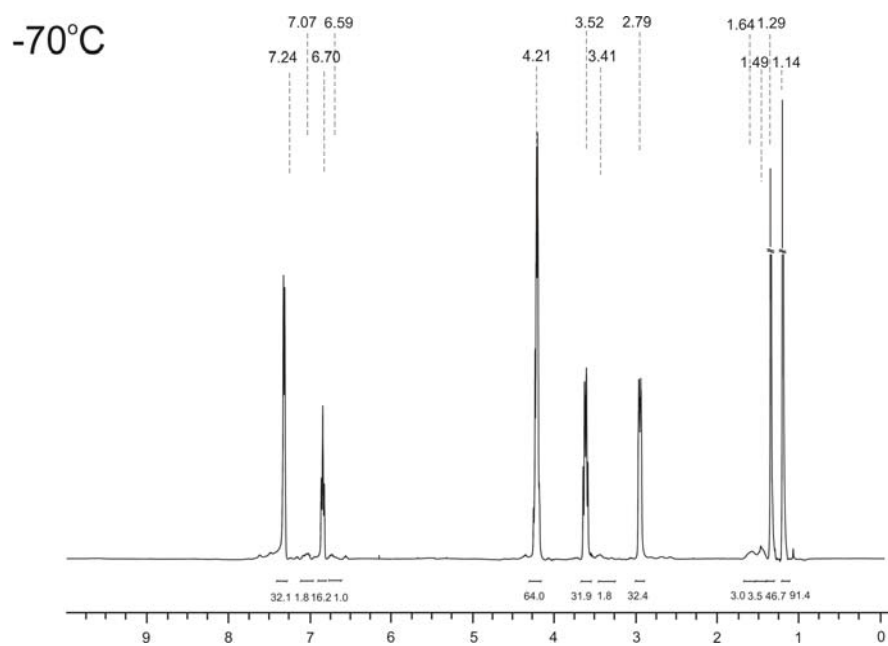

**Figure 18S.**  $^1\text{H}$  NMR spectra of **1** in the solution of  $\text{CD}_2\text{Cl}_2$  recorded at  $-70^\circ\text{C}$ .

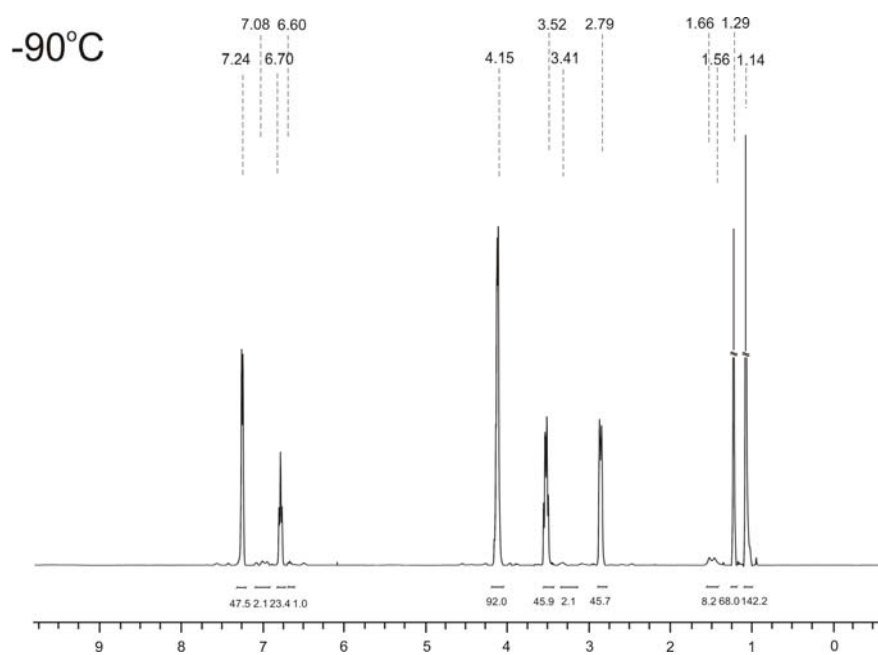

**Figure 19S.**  $^1\text{H}$  NMR spectra of **1** in the solution of  $\text{CD}_2\text{Cl}_2$  recorded at  $-90^\circ\text{C}$ .

## 6. Scan coordinates

**Table 13S.** Cartesian coordinates for **1** with B–N distance constrained to 1.5 Å (*a*), 1.6 Å (*b*) and 1.7 Å (*c*). All others parameters were fully optimised at B3LYP/aug-cc-pVDZ level.

| <i>Atom</i> | $d_{\text{B-N}} = 1.5 \text{ \AA} \text{ (a)}$ |              |              | $d_{\text{B-N}} = 1.6 \text{ \AA} \text{ (b)}$ |              |              | $d_{\text{B-N}} = 1.7 \text{ \AA} \text{ (c)}$ |              |              |
|-------------|------------------------------------------------|--------------|--------------|------------------------------------------------|--------------|--------------|------------------------------------------------|--------------|--------------|
|             | <i>x</i> / Å                                   | <i>y</i> / Å | <i>z</i> / Å | <i>x</i> / Å                                   | <i>y</i> / Å | <i>z</i> / Å | <i>x</i> / Å                                   | <i>y</i> / Å | <i>z</i> / Å |
| F(1)        | -1.193528                                      | -0.004740    | -0.661939    | -1.193614                                      | -0.006383    | -0.662203    | -1.195953                                      | 0.000526     | -0.660662    |
| F(2)        | 3.526796                                       | 0.067019     | -0.743908    | 3.525826                                       | 0.072207     | -0.747109    | 3.525901                                       | 0.059576     | -0.747185    |
| O(1)        | 0.147795                                       | 0.999484     | 4.158497     | 0.036682                                       | 0.841742     | 4.158901     | -0.006971                                      | 0.767632     | 4.131085     |
| O(2)        | 2.561412                                       | 0.497504     | 4.162543     | 2.498367                                       | 0.654567     | 4.153681     | 2.478545                                       | 0.793798     | 4.103057     |
| N(1)        | 0.950253                                       | -1.164402    | 4.547088     | 1.112284                                       | -1.236697    | 4.617073     | 1.266122                                       | -1.222938    | 4.749981     |
| B(1)        | 1.232598                                       | 0.056504     | 3.722667     | 1.231650                                       | 0.078293     | 3.713440     | 1.237210                                       | 0.125150     | 3.714693     |
| C(1)        | 1.216936                                       | 0.000000     | 2.095873     | 1.217824                                       | 0.000000     | 2.093416     | 1.217531                                       | 0.000000     | 2.094815     |
| C(2)        | 0.000000                                       | 0.000000     | 1.388693     | 0.000000                                       | 0.000000     | 1.388631     | 0.000000                                       | 0.000000     | 1.388743     |
| C(3)        | 0.000000                                       | 0.000000     | 0.000000     | 0.000000                                       | 0.000000     | 0.000000     | 0.000000                                       | 0.000000     | 0.000000     |
| C(4)        | 1.167476                                       | 0.009323     | -0.758217    | 1.166049                                       | 0.011826     | -0.759244    | 1.164339                                       | 0.009031     | -0.761440    |
| C(5)        | 2.358543                                       | 0.032919     | -0.040247    | 2.358036                                       | 0.035876     | -0.042298    | 2.355271                                       | 0.029820     | -0.042549    |
| C(6)        | 2.408834                                       | 0.028821     | 1.349201     | 2.409896                                       | 0.031350     | 1.346424     | 2.408293                                       | 0.032505     | 1.345439     |
| C(7)        | -0.768525                                      | 0.401943     | 5.035443     | -0.702065                                      | 0.204336     | 5.165819     | -0.321897                                      | 0.480241     | 5.467131     |
| C(8)        | -0.535913                                      | -1.100294    | 4.848436     | -0.342431                                      | -1.273613    | 5.032662     | 0.052183                                       | -0.994518    | 5.628326     |
| C(9)        | 2.556080                                       | 0.392788     | 5.562614     | 2.539126                                       | 0.535285     | 5.550489     | 2.854890                                       | 0.491456     | 5.420962     |
| C(10)       | 1.719447                                       | -0.872991    | 5.855204     | 1.944800                                       | -0.850348    | 5.847366     | 2.516676                                       | -0.991312    | 5.576673     |
| C(11)       | 1.368195                                       | -2.594481    | 4.032226     | 1.612878                                       | -2.623030    | 4.072068     | 1.237360                                       | -2.685753    | 4.191906     |
| C(12)       | 1.012196                                       | -3.654143    | 5.095253     | 1.362704                                       | -3.712345    | 5.136511     | 1.236464                                       | -3.692805    | 5.354879     |
| C(13)       | 0.663251                                       | -2.989323    | 2.720211     | 0.918793                                       | -3.047317    | 2.761765     | -0.038066                                      | -2.905106    | 3.363783     |
| C(14)       | 2.882593                                       | -2.597139    | 3.766320     | 3.118807                                       | -2.535325    | 3.775155     | 2.463951                                       | -2.948289    | 3.295602     |
| H(2)        | -0.954268                                      | 0.036075     | 1.911301     | -0.950910                                      | 0.030684     | 1.917117     | -0.949521                                      | 0.038872     | 1.918884     |
| H(4)        | 1.148163                                       | 0.019502     | -1.845374    | 1.146360                                       | 0.021237     | -1.846450    | 1.144914                                       | 0.014901     | -1.848340    |
| H(6)        | 3.375076                                       | 0.082329     | 1.847203     | 3.376935                                       | 0.090821     | 1.841953     | 3.376169                                       | 0.102305     | 1.838338     |
| H(7A)       | -1.803349                                      | 0.680259     | 4.781291     | -1.781477                                      | 0.362390     | 5.018255     | -1.398268                                      | 0.626286     | 5.640424     |
| H(7B)       | -0.597285                                      | 0.708170     | 6.085793     | -0.449216                                      | 0.588069     | 6.172945     | 0.218387                                       | 1.130698     | 6.175335     |
| H(8A)       | -0.791108                                      | -1.728955    | 5.705766     | -0.478747                                      | -1.860753    | 5.945354     | 0.257905                                       | -1.301006    | 6.658946     |
| H(8B)       | -1.071956                                      | -1.450036    | 3.964968     | -0.925221                                      | -1.719857    | 4.226887     | -0.764153                                      | -1.600279    | 5.234623     |
| H(9A)       | 1.003411                                       | -0.749330    | 6.671429     | 1.306479                                       | -0.859924    | 6.734800     | 2.362114                                       | -1.315013    | 6.611043     |
| H(9B)       | 2.355802                                       | -1.724301    | 6.085095     | 2.733681                                       | -1.586380    | 5.988419     | 3.326688                                       | -1.573845    | 5.141462     |
| H(10A)      | 3.583419                                       | 0.291117     | 5.940864     | 3.576482                                       | 0.606357     | 5.906471     | 3.934543                                       | 0.656923     | 5.551974     |
| H(10B)      | 2.097965                                       | 1.279129     | 6.032046     | 1.948277                                       | 1.326266     | 6.042006     | 2.332545                                       | 1.119805     | 6.162064     |
| H(12A)      | 1.488205                                       | -4.599231    | 4.811474     | 1.869196                                       | -4.630923    | 4.816979     | 2.130846                                       | -3.608877    | 5.983161     |
| H(12B)      | -0.067534                                      | -3.834070    | 5.141771     | 0.297641                                       | -3.949300    | 5.241239     | 1.231856                                       | -4.705719    | 4.930989     |
| H(12C)      | 1.364247                                       | -3.403831    | 6.101074     | 1.759431                                       | -3.449036    | 6.123904     | 0.346986                                       | -3.603361    | 5.990571     |
| H(13A)      | 0.917343                                       | -4.037645    | 2.525039     | 1.208867                                       | -4.086157    | 2.562041     | -0.146665                                      | -2.163229    | 2.570536     |
| H(13B)      | 0.995544                                       | -2.397799    | 1.870053     | 1.236090                                       | -2.439937    | 1.914414     | -0.947015                                      | -2.916307    | 3.975300     |
| H(13C)      | -0.428641                                      | -2.934722    | 2.781163     | -0.174451                                      | -3.022816    | 2.806248     | 0.030309                                       | -3.893748    | 2.893663     |
| H(14A)      | 3.483776                                       | -2.447217    | 4.668702     | 3.738047                                       | -2.403536    | 4.668812     | 3.385462                                       | -3.095145    | 3.870251     |
| H(14B)      | 3.158399                                       | -1.837390    | 3.033545     | 3.341484                                       | -1.731149    | 3.070468     | 2.620112                                       | -2.153578    | 2.563477     |
| H(14C)      | 3.148889                                       | -3.579304    | 3.358910     | 3.421355                                       | -3.484076    | 3.313865     | 2.294466                                       | -3.877532    | 2.738555     |

**Table 14S.** Cartesian coordinates for **1** with B-N distance constrained to 1.8 Å (*a*), 1.9 Å (*b*) and 2.0 Å (*c*).

| <i>Atom</i> | $d_{\text{B-N}} = 1.8 \text{ \AA} \text{ (a)}$ |              |              | $d_{\text{B-N}} = 1.9 \text{ \AA} \text{ (b)}$ |              |              | $d_{\text{B-N}} = 2.0 \text{ \AA} \text{ (c)}$ |              |              |
|-------------|------------------------------------------------|--------------|--------------|------------------------------------------------|--------------|--------------|------------------------------------------------|--------------|--------------|
|             | <i>x</i> / Å                                   | <i>y</i> / Å | <i>z</i> / Å | <i>x</i> / Å                                   | <i>y</i> / Å | <i>z</i> / Å | <i>x</i> / Å                                   | <i>y</i> / Å | <i>z</i> / Å |
| F(1)        | -1.193711                                      | -0.008248    | -0.662259    | -1.193521                                      | -0.004683    | -0.661648    | -1.192087                                      | -0.002854    | -0.662656    |
| F(2)        | 3.526884                                       | 0.074580     | -0.748909    | 3.525890                                       | 0.058402     | -0.753372    | 3.527145                                       | 0.049335     | -0.750952    |
| O(1)        | -0.021251                                      | 0.626696     | 4.182766     | -0.004747                                      | 0.556642     | 4.208373     | -0.002924                                      | 0.534004     | 4.221447     |
| O(2)        | 2.469174                                       | 0.649056     | 4.170517     | 2.485701                                       | 0.629855     | 4.160715     | 2.483904                                       | 0.526303     | 4.197653     |
| N(1)        | 1.247366                                       | -1.436737    | 4.693061     | 1.314112                                       | -1.516184    | 4.736368     | 1.246247                                       | -1.620898    | 4.756395     |
| B(1)        | 1.232056                                       | 0.067034     | 3.703901     | 1.248127                                       | 0.072011     | 3.695560     | 1.240397                                       | 0.069502     | 3.687511     |
| C(1)        | 1.219270                                       | 0.000000     | 2.091770     | 1.221059                                       | 0.000000     | 2.088947     | 1.220888                                       | 0.000000     | 2.088564     |
| C(2)        | 0.000000                                       | 0.000000     | 1.388498     | 0.000000                                       | 0.000000     | 1.388880     | 0.000000                                       | 0.000000     | 1.388758     |
| C(3)        | 0.000000                                       | 0.000000     | 0.000000     | 0.000000                                       | 0.000000     | 0.000000     | 0.000000                                       | 0.000000     | 0.000000     |
| C(4)        | 1.166393                                       | 0.013573     | -0.759600    | 1.165335                                       | 0.010222     | -0.760598    | 1.166858                                       | 0.007056     | -0.758357    |
| C(5)        | 2.358568                                       | 0.039265     | -0.043367    | 2.359021                                       | 0.031187     | -0.046271    | 2.361087                                       | 0.025542     | -0.044053    |
| C(6)        | 2.410991                                       | 0.037225     | 1.345124     | 2.413009                                       | 0.031646     | 1.341773     | 2.414671                                       | 0.027372     | 1.344035     |
| C(7)        | -0.460168                                      | 0.113129     | 5.414988     | -0.329023                                      | 0.115292     | 5.503231     | -0.447118                                      | -0.021007    | 5.437236     |
| C(8)        | -0.083625                                      | -1.370214    | 5.379648     | 0.060187                                       | -1.365629    | 5.543182     | -0.097092                                      | -1.512799    | 5.383302     |
| C(9)        | 2.707624                                       | 0.361054     | 5.523661     | 2.812515                                       | 0.278460     | 5.481395     | 2.670428                                       | 0.237977     | 5.561488     |
| C(10)       | 2.337604                                       | -1.129090    | 5.696715     | 2.506358                                       | -1.223153    | 5.601392     | 2.301754                                       | -1.250380    | 5.753083     |
| C(11)       | 1.447129                                       | -2.829964    | 4.034076     | 1.409403                                       | -2.915892    | 4.082591     | 1.482227                                       | -2.997297    | 4.112390     |
| C(12)       | 1.289434                                       | -3.923133    | 5.106146     | 1.406424                                       | -4.006493    | 5.170129     | 1.424623                                       | -4.105082    | 5.183079     |
| C(13)       | 0.393626                                       | -3.057059    | 2.936213     | 0.220712                                       | -3.146353    | 3.131473     | 0.405863                                       | -3.272444    | 3.046497     |
| C(14)       | 2.842802                                       | -2.939622    | 3.386987     | 2.703740                                       | -3.029280    | 3.253745     | 2.854131                                       | -3.035761    | 3.411403     |
| H(2)        | -0.947595                                      | 0.015910     | 1.922672     | -0.946916                                      | 0.020233     | 1.924502     | -0.946703                                      | 0.021545     | 1.924682     |
| H(4)        | 1.146500                                       | 0.018884     | -1.846769    | 1.144148                                       | 0.013973     | -1.847754    | 1.146648                                       | 0.009797     | -1.845650    |
| H(6)        | 3.378211                                       | 0.098081     | 1.840301     | 3.379698                                       | 0.085210     | 1.838651     | 3.380891                                       | 0.076228     | 1.842296     |
| H(7A)       | -1.549273                                      | 0.237038     | 5.503441     | -1.409933                                      | 0.231539     | 5.667404     | -1.534688                                      | 0.116462     | 5.517873     |
| H(7B)       | 0.000109                                       | 0.629678     | 6.274127     | 0.185395                                       | 0.699937     | 6.282838     | 0.010511                                       | 0.474351     | 6.309123     |
| H(8A)       | -0.045471                                      | -1.843925    | 6.367048     | 0.194817                                       | -1.743929    | 6.563884     | -0.123494                                      | -1.979979    | 6.377301     |
| H(8B)       | -0.811888                                      | -1.900342    | 4.761609     | -0.731889                                      | -1.940146    | 5.062916     | -0.822785                                      | -2.017356    | 4.742756     |
| H(9A)       | 2.009316                                       | -1.383490    | 6.710826     | 2.328050                                       | -1.538667    | 6.636462     | 1.962475                                       | -1.457779    | 6.776373     |
| H(9B)       | 3.212268                                       | -1.728654    | 5.459057     | 3.360652                                       | -1.778391    | 5.216224     | 3.190280                                       | -1.850218    | 5.569167     |
| H(10A)      | 3.769889                                       | 0.524310     | 5.755711     | 3.882273                                       | 0.464864     | 5.653005     | 3.724582                                       | 0.406197     | 5.821695     |
| H(10B)      | 2.118656                                       | 1.010230     | 6.191735     | 2.252128                                       | 0.876076     | 6.217791     | 2.061862                                       | 0.896932     | 6.199427     |
| H(12A)      | 1.951730                                       | -3.762995    | 5.965705     | 2.240928                                       | -3.892130    | 5.873491     | 2.176602                                       | -3.960414    | 5.969414     |
| H(12B)      | 1.555636                                       | -4.891689    | 4.665031     | 1.514976                                       | -4.988190    | 4.691039     | 1.626955                                       | -5.075413    | 4.710871     |
| H(12C)      | 0.256779                                       | -3.999407    | 5.467212     | 0.468669                                       | -4.022299    | 5.739016     | 0.435934                                       | -4.169701    | 5.654750     |
| H(13A)      | 0.556616                                       | -2.406498    | 2.075802     | 0.173357                                       | -2.383723    | 2.350339     | 0.370608                                       | -2.481158    | 2.292831     |
| H(13B)      | -0.634568                                      | -2.919565    | 3.286009     | -0.745400                                      | -3.185892    | 3.645911     | -0.595324                                      | -3.397384    | 3.474514     |
| H(13C)      | 0.476952                                       | -4.097530    | 2.598458     | 0.356122                                       | -4.120595    | 2.646062     | 0.652778                                       | -4.213587    | 2.540501     |
| H(14A)      | 3.640813                                       | -3.116576    | 4.116853     | 3.601452                                       | -3.142593    | 3.871876     | 3.699064                                       | -2.977513    | 4.105972     |
| H(14B)      | 3.086619                                       | -2.050802    | 2.800506     | 2.835111                                       | -2.170732    | 2.589863     | 2.946187                                       | -2.231990    | 2.675486     |
| H(14C)      | 2.842616                                       | -3.798342    | 2.705819     | 2.638335                                       | -3.928262    | 2.629304     | 2.949637                                       | -3.992717    | 2.884653     |

**Table 15S.** Cartesian coordinates for **1** with B-N distance constrained to 2.1 Å (*a*), 2.2 Å (*b*) and 2.3 Å (*c*).

| <i>Atom</i> | $d_{\text{B-N}} = 2.1 \text{ \AA} \text{ (a)}$ |              |              | $d_{\text{B-N}} = 2.2 \text{ \AA} \text{ (b)}$ |              |              | $d_{\text{B-N}} = 2.3 \text{ \AA} \text{ (c)}$ |              |              |
|-------------|------------------------------------------------|--------------|--------------|------------------------------------------------|--------------|--------------|------------------------------------------------|--------------|--------------|
|             | <i>x</i> / Å                                   | <i>y</i> / Å | <i>z</i> / Å | <i>x</i> / Å                                   | <i>y</i> / Å | <i>z</i> / Å | <i>x</i> / Å                                   | <i>y</i> / Å | <i>z</i> / Å |
| F(1)        | -1.193533                                      | -0.004293    | -0.661056    | -1.192409                                      | -0.003947    | -0.661750    | -1.191838                                      | -0.004050    | -0.662110    |
| F(2)        | 3.525577                                       | 0.042254     | -0.758703    | 3.526227                                       | 0.037283     | -0.757051    | 3.526763                                       | 0.031556     | -0.756882    |
| O(1)        | 0.022720                                       | 0.427597     | 4.251896     | 0.023103                                       | 0.334613     | 4.270016     | 0.013523                                       | 0.207242     | 4.276095     |
| O(2)        | 2.515826                                       | 0.423715     | 4.192994     | 2.514602                                       | 0.321552     | 4.216507     | 2.503464                                       | 0.290191     | 4.226906     |
| N(1)        | 1.281524                                       | -1.768988    | 4.752127     | 1.271719                                       | -1.911697    | 4.744357     | 1.343252                                       | -2.023382    | 4.769010     |
| B(1)        | 1.257538                                       | 0.036504     | 3.679922     | 1.256025                                       | 0.011485     | 3.676121     | 1.255231                                       | -0.004033    | 3.671520     |
| C(1)        | 1.223600                                       | 0.000000     | 2.084457     | 1.223476                                       | 0.000000     | 2.084868     | 1.223879                                       | 0.000000     | 2.084098     |
| C(2)        | 0.000000                                       | 0.000000     | 1.388740     | 0.000000                                       | 0.000000     | 1.388937     | 0.000000                                       | 0.000000     | 1.388762     |
| C(3)        | 0.000000                                       | 0.000000     | 0.000000     | 0.000000                                       | 0.000000     | 0.000000     | 0.000000                                       | 0.000000     | 0.000000     |
| C(4)        | 1.164872                                       | 0.008157     | -0.761275    | 1.165947                                       | 0.008218     | -0.759688    | 1.166512                                       | 0.006679     | -0.759090    |
| C(5)        | 2.360268                                       | 0.023043     | -0.049227    | 2.361638                                       | 0.020521     | -0.047725    | 2.362451                                       | 0.017812     | -0.047435    |
| C(6)        | 2.416744                                       | 0.022146     | 1.338339     | 2.417616                                       | 0.017083     | 1.339882     | 2.418676                                       | 0.015621     | 1.340215     |
| C(7)        | -0.287708                                      | -0.057396    | 5.538192     | -0.271812                                      | -0.176129    | 5.552073     | -0.231680                                      | -0.292947    | 5.574104     |
| C(8)        | 0.038908                                       | -1.557088    | 5.537293     | 0.042467                                       | -1.681551    | 5.533350     | 0.145831                                       | -1.788644    | 5.595672     |
| C(9)        | 2.819451                                       | 0.007937     | 5.503799     | 2.815340                                       | -0.143287    | 5.513898     | 2.844429                                       | -0.206520    | 5.504965     |
| C(10)       | 2.478582                                       | -1.494018    | 5.590686     | 2.476872                                       | -1.646966    | 5.561621     | 2.576581                                       | -1.724443    | 5.517051     |
| C(11)       | 1.325975                                       | -3.133486    | 4.054676     | 1.302924                                       | -3.256423    | 4.023856     | 1.352044                                       | -3.359849    | 4.047281     |
| C(12)       | 1.325755                                       | -4.281113    | 5.083513     | 1.341626                                       | -4.420681    | 5.032442     | 1.380625                                       | -4.531537    | 5.048716     |
| C(13)       | 0.111567                                       | -3.279430    | 3.117877     | 0.059749                                       | -3.398610    | 3.123820     | 0.103401                                       | -3.471728    | 3.150478     |
| C(14)       | 2.590824                                       | -3.229654    | 3.180737     | 2.537063                                       | -3.326988    | 3.103564     | 2.581874                                       | -3.442804    | 3.121077     |
| H(2)        | -0.946180                                      | 0.019212     | 1.925915     | -0.946145                                      | 0.012765     | 1.926234     | -0.945702                                      | 0.007456     | 1.926818     |
| H(4)        | 1.142438                                       | 0.011193     | -1.848399    | 1.143787                                       | 0.011719     | -1.846905    | 1.144821                                       | 0.008772     | -1.846346    |
| H(6)        | 3.383767                                       | 0.059501     | 1.835894     | 3.384192                                       | 0.042095     | 1.838902     | 3.385280                                       | 0.037976     | 1.839297     |
| H(7A)       | -1.360299                                      | 0.095699     | 5.721567     | -1.341582                                      | -0.019404    | 5.747266     | -1.303886                                      | -0.177802    | 5.783366     |
| H(7B)       | 0.258665                                       | 0.484716     | 6.324511     | 0.283452                                       | 0.353871     | 6.339273     | 0.310675                                       | 0.282634     | 6.336535     |
| H(8A)       | 0.129117                                       | -1.948668    | 6.560870     | 0.128361                                       | -2.075486    | 6.558161     | 0.286470                                       | -2.128681    | 6.635093     |
| H(8B)       | -0.781783                                      | -2.078612    | 5.044515     | -0.789676                                      | -2.189574    | 5.045825     | -0.689232                                      | -2.349571    | 5.174680     |
| H(9A)       | 2.322657                                       | -1.809575    | 6.632297     | 2.348451                                       | -1.984904    | 6.601592     | 2.534673                                       | -2.094575    | 6.555065     |
| H(9B)       | 3.323775                                       | -2.055098    | 5.193162     | 3.318609                                       | -2.193691    | 5.136181     | 3.416744                                       | -2.213079    | 5.022774     |
| H(10A)      | 3.893004                                       | 0.162272     | 5.680012     | 3.889331                                       | 0.004525     | 5.691914     | 3.914269                                       | -0.017261    | 5.666979     |
| H(10B)      | 2.276236                                       | 0.601128     | 6.254127     | 2.276171                                       | 0.428197     | 6.282696     | 2.298490                                       | 0.318196     | 6.300771     |
| H(12A)      | 2.196957                                       | -4.237121    | 5.750068     | 2.243175                                       | -4.388820    | 5.657876     | 2.273874                                       | -4.495644    | 5.686403     |
| H(12B)      | 1.364561                                       | -5.244677    | 4.557547     | 1.346871                                       | -5.378313    | 4.494822     | 1.398413                                       | -5.487811    | 4.508631     |
| H(12C)      | 0.416829                                       | -4.279743    | 5.698816     | 0.462767                                       | -4.416803    | 5.690109     | 0.493790                                       | -4.534012    | 5.695901     |
| H(13A)      | 0.022024                                       | -2.422871    | 2.442331     | -0.068960                                      | -2.519055    | 2.484524     | 0.017511                                       | -2.604514    | 2.486974     |
| H(13B)      | -0.834010                                      | -3.407812    | 3.657061     | -0.864462                                      | -3.565793    | 3.688412     | -0.829219                                      | -3.574737    | 3.716533     |
| H(13C)      | 0.246248                                       | -4.180048    | 2.506436     | 0.191562                                       | -4.273159    | 2.475131     | 0.192586                                       | -4.370671    | 2.528137     |
| H(14A)      | 3.515541                                       | -3.304320    | 3.763978     | 3.483769                                       | -3.389776    | 3.651352     | 3.524130                                       | -3.569682    | 3.666450     |
| H(14B)      | 2.668684                                       | -2.375665    | 2.500111     | 2.576456                                       | -2.464939    | 2.430153     | 2.657743                                       | -2.553777    | 2.485367     |
| H(14C)      | 2.530484                                       | -4.142517    | 2.575628     | 2.469554                                       | -4.234754    | 2.491434     | 2.477644                                       | -4.318923    | 2.469399     |

**Table 16S.** Cartesian coordinates for **1** with B-N distance constrained to 2.4 Å (*a*), 2.5 Å (*b*) and 2.6 Å (*c*).

| <i>Atom</i> | $d_{\text{B-N}} = 2.4 \text{ \AA} \text{ (a)}$ |              |              | $d_{\text{B-N}} = 2.5 \text{ \AA} \text{ (b)}$ |              |              | $d_{\text{B-N}} = 2.6 \text{ \AA} \text{ (c)}$ |              |              |
|-------------|------------------------------------------------|--------------|--------------|------------------------------------------------|--------------|--------------|------------------------------------------------|--------------|--------------|
|             | <i>x</i> / Å                                   | <i>y</i> / Å | <i>z</i> / Å | <i>x</i> / Å                                   | <i>y</i> / Å | <i>z</i> / Å | <i>x</i> / Å                                   | <i>y</i> / Å | <i>z</i> / Å |
| F(1)        | -1.191111                                      | -0.004917    | -0.662248    | -1.191496                                      | 0.000901     | -0.662034    | -1.190851                                      | 0.007570     | -0.662434    |
| F(2)        | 3.527139                                       | 0.027349     | -0.756561    | 3.526902                                       | 0.001855     | -0.758777    | 3.527531                                       | -0.025286    | -0.756738    |
| O(1)        | 0.020114                                       | 0.173062     | 4.278918     | 0.025988                                       | 0.136981     | 4.280724     | 0.020990                                       | 0.171310     | 4.269905     |
| O(2)        | 2.510564                                       | 0.174291     | 4.232548     | 2.513077                                       | 0.151327     | 4.228203     | 2.507686                                       | 0.151299     | 4.227547     |
| N(1)        | 1.276906                                       | -2.125822    | 4.819254     | 1.298323                                       | -2.160784    | 4.939565     | 1.259547                                       | -2.093635    | 5.171591     |
| B(1)        | 1.254705                                       | -0.020050    | 3.668067     | 1.258295                                       | -0.010534    | 3.664880     | 1.253188                                       | 0.024849     | 3.664280     |
| C(1)        | 1.224204                                       | 0.000000     | 2.083550     | 1.225020                                       | 0.000000     | 2.082204     | 1.224721                                       | 0.000000     | 2.082617     |
| C(2)        | 0.000000                                       | 0.000000     | 1.388779     | 0.000000                                       | 0.000000     | 1.388734     | 0.000000                                       | 0.000000     | 1.388606     |
| C(3)        | 0.000000                                       | 0.000000     | 0.000000     | 0.000000                                       | 0.000000     | 0.000000     | 0.000000                                       | 0.000000     | 0.000000     |
| C(4)        | 1.167154                                       | 0.006391     | -0.758211    | 1.166672                                       | -0.001347    | -0.758828    | 1.167506                                       | -0.010113    | -0.757653    |
| C(5)        | 2.363498                                       | 0.015771     | -0.047030    | 2.363553                                       | 0.000716     | -0.048498    | 2.364124                                       | -0.016165    | -0.046860    |
| C(6)        | 2.419700                                       | 0.012298     | 1.340605     | 2.420583                                       | 0.001606     | 1.339029     | 2.420963                                       | -0.010434    | 1.340712     |
| C(7)        | -0.240422                                      | -0.321017    | 5.578749     | -0.224586                                      | -0.312667    | 5.600358     | -0.229011                                      | -0.148402    | 5.628214     |
| C(8)        | 0.075947                                       | -1.831307    | 5.611447     | 0.095931                                       | -1.819768    | 5.703065     | 0.071555                                       | -1.641766    | 5.892894     |
| C(9)        | 2.821516                                       | -0.320731    | 5.520678     | 2.817898                                       | -0.289860    | 5.539105     | 2.805057                                       | -0.187540    | 5.571883     |
| C(10)       | 2.506556                                       | -1.831248    | 5.565256     | 2.524357                                       | -1.801834    | 5.655631     | 2.498489                                       | -1.680007    | 5.825873     |
| C(11)       | 1.268514                                       | -3.459787    | 4.106689     | 1.286667                                       | -3.522483    | 4.289344     | 1.216734                                       | -3.504383    | 4.650885     |
| C(12)       | 1.293043                                       | -4.629552    | 5.111398     | 1.257070                                       | -4.649833    | 5.341468     | 1.172849                                       | -4.533196    | 5.799505     |
| C(13)       | 0.010608                                       | -3.562722    | 3.221157     | 0.058228                                       | -3.637828    | 3.364394     | -0.019959                                      | -3.676509    | 3.744938     |
| C(14)       | 2.489147                                       | -3.550530    | 3.167996     | 2.531747                                       | -3.682438    | 3.393647     | 2.453077                                       | -3.767391    | 3.766186     |
| H(2)        | -0.945589                                      | 0.005639     | 1.927041     | -0.945391                                      | 0.008546     | 1.927121     | -0.945451                                      | 0.015666     | 1.926679     |
| H(4)        | 1.145623                                       | 0.007866     | -1.845542    | 1.144482                                       | -0.001295    | -1.846123    | 1.146163                                       | -0.011342    | -1.845017    |
| H(6)        | 3.385952                                       | 0.027465     | 1.840555     | 3.387180                                       | 0.011653     | 1.838323     | 3.387444                                       | -0.003735    | 1.840239     |
| H(7A)       | -1.307538                                      | -0.164109    | 5.786159     | -1.292153                                      | -0.153323    | 5.802997     | -1.294455                                      | 0.042658     | 5.813498     |
| H(7B)       | 0.321685                                       | 0.237229     | 6.338896     | 0.334160                                       | 0.280530     | 6.335373     | 0.335891                                       | 0.511436     | 6.298064     |
| H(8A)       | 0.173150                                       | -2.164733    | 6.659654     | 0.180289                                       | -2.097232    | 6.770042     | 0.157049                                       | -1.794283    | 6.985834     |
| H(8B)       | -0.774396                                      | -2.358142    | 5.176899     | -0.752716                                      | -2.367023    | 5.290207     | -0.789860                                      | -2.218515    | 5.553388     |
| H(9A)       | 2.448872                                       | -2.165035    | 6.616190     | 2.486951                                       | -2.080244    | 6.725225     | 2.480962                                       | -1.853726    | 6.919284     |
| H(9B)       | 3.339337                                       | -2.358949    | 5.098023     | 3.364510                                       | -2.334155    | 5.208760     | 3.326887                                       | -2.260753    | 5.418243     |
| H(10A)      | 3.896016                                       | -0.164565    | 5.686163     | 3.889706                                       | -0.114915    | 5.702651     | 3.878832                                       | -0.010834    | 5.719217     |
| H(10B)      | 2.289996                                       | 0.237419     | 6.302514     | 2.277332                                       | 0.298041     | 6.291551     | 2.273164                                       | 0.468715     | 6.271473     |
| H(12A)      | 1.289018                                       | -5.590064    | 4.578367     | 2.138890                                       | -4.610625    | 5.995211     | 1.159521                                       | -5.556944    | 5.400745     |
| H(12B)      | 0.414200                                       | -4.612201    | 5.769905     | 1.251810                                       | -5.632328    | 4.849974     | 0.273740                                       | -4.405906    | 6.417582     |
| H(12C)      | 2.194134                                       | -4.602344    | 5.738595     | 0.359204                                       | -4.589710    | 5.970994     | 2.053040                                       | -4.441750    | 6.450512     |
| H(13A)      | -0.077579                                      | -2.690406    | 2.563353     | 0.009533                                       | -2.787020    | 2.674836     | -0.049011                                      | -2.893382    | 2.977624     |
| H(13B)      | -0.917031                                      | -3.665110    | 3.796003     | -0.889915                                      | -3.701751    | 3.910427     | -0.966868                                      | -3.660158    | 4.296884     |
| H(13C)      | 0.090082                                       | -4.458561    | 2.593232     | 0.140336                                       | -4.557105    | 2.771395     | 0.033630                                       | -4.650261    | 3.242434     |
| H(14A)      | 3.439354                                       | -3.657791    | 3.703861     | 3.462146                                       | -3.792856    | 3.962067     | 3.379886                                       | -3.873509    | 4.342334     |
| H(14B)      | 2.549955                                       | -2.670496    | 2.517668     | 2.633474                                       | -2.829426    | 2.711646     | 2.585595                                       | -2.964300    | 3.030845     |
| H(14C)      | 2.385993                                       | -4.438705    | 2.532545     | 2.424145                                       | -4.592747    | 2.791299     | 2.312230                                       | -4.709878    | 3.222917     |

**Table 17S.** Cartesian coordinates for **1** with B-N distance constrained to 2.7 Å (*a*), 2.8 Å (*b*) and 2.9 Å (*c*).

| <i>Atom</i> | $d_{\text{B-N}} = 2.7 \text{ \AA} \text{ (a)}$ |              |              | $d_{\text{B-N}} = 2.8 \text{ \AA} \text{ (b)}$ |              |              | $d_{\text{B-N}} = 2.9 \text{ \AA} \text{ (c)}$ |              |              |
|-------------|------------------------------------------------|--------------|--------------|------------------------------------------------|--------------|--------------|------------------------------------------------|--------------|--------------|
|             | <i>x</i> / Å                                   | <i>y</i> / Å | <i>z</i> / Å | <i>x</i> / Å                                   | <i>y</i> / Å | <i>z</i> / Å | <i>x</i> / Å                                   | <i>y</i> / Å | <i>z</i> / Å |
| F(1)        | -1.191164                                      | 0.004325     | -0.662373    | -1.189668                                      | 0.002317     | -0.662282    | -1.188099                                      | 0.000630     | -0.662554    |
| F(2)        | 3.527472                                       | -0.014667    | -0.757534    | 3.527708                                       | -0.008601    | -0.756350    | 3.528292                                       | -0.000819    | -0.754636    |
| O(1)        | 0.022186                                       | 0.110035     | 4.271869     | 0.029720                                       | 0.105566     | 4.277218     | 0.028545                                       | -0.028507    | 4.279165     |
| O(2)        | 2.506017                                       | 0.104076     | 4.229803     | 2.505055                                       | 0.032524     | 4.232497     | 2.498347                                       | 0.073374     | 4.236384     |
| N(1)        | 1.275004                                       | -2.139798    | 5.295609     | 1.221856                                       | -2.155279    | 5.447972     | 1.370618                                       | -2.180255    | 5.583725     |
| B(1)        | 1.253976                                       | 0.010160     | 3.662441     | 1.254651                                       | 0.000067     | 3.660961     | 1.254592                                       | -0.013849    | 3.659349     |
| C(1)        | 1.225063                                       | 0.000000     | 2.081973     | 1.225305                                       | 0.000000     | 2.081564     | 1.225145                                       | 0.000000     | 2.081615     |
| C(2)        | 0.000000                                       | 0.000000     | 1.388548     | 0.000000                                       | 0.000000     | 1.388673     | 0.000000                                       | 0.000000     | 1.388775     |
| C(3)        | 0.000000                                       | 0.000000     | 0.000000     | 0.000000                                       | 0.000000     | 0.000000     | 0.000000                                       | 0.000000     | 0.000000     |
| C(4)        | 1.167353                                       | -0.005894    | -0.757861    | 1.168324                                       | -0.003082    | -0.756437    | 1.169562                                       | -0.000801    | -0.754838    |
| C(5)        | 2.364051                                       | -0.009353    | -0.047278    | 2.365519                                       | -0.005474    | -0.046825    | 2.367160                                       | 0.000083     | -0.045968    |
| C(6)        | 2.421349                                       | -0.006247    | 1.340200     | 2.422189                                       | -0.004430    | 1.340748     | 2.422456                                       | 0.002004     | 1.341774     |
| C(7)        | -0.224948                                      | -0.171363    | 5.641405     | -0.211949                                      | -0.107993    | 5.661413     | -0.197461                                      | -0.206236    | 5.672488     |
| C(8)        | 0.074361                                       | -1.652367    | 5.967477     | 0.036735                                       | -1.576484    | 6.071028     | 0.144239                                       | -1.633105    | 6.154964     |
| C(9)        | 2.798840                                       | -0.181899    | 5.589455     | 2.786161                                       | -0.200607    | 5.605942     | 2.787453                                       | -0.094641    | 5.619612     |
| C(10)       | 2.503672                                       | -1.661903    | 5.921400     | 2.464685                                       | -1.652762    | 6.022198     | 2.578809                                       | -1.545904    | 6.101256     |
| C(11)       | 1.264508                                       | -3.582576    | 4.875210     | 1.172920                                       | -3.633442    | 5.188006     | 1.425690                                       | -3.675248    | 5.471444     |
| C(12)       | 1.323230                                       | -4.529113    | 6.091911     | 1.182995                                       | -4.448252    | 6.499215     | 1.484079                                       | -4.354948    | 6.857645     |
| C(13)       | -0.007500                                      | -3.871084    | 4.050670     | -0.095295                                      | -3.971980    | 4.373592     | 0.187508                                       | -4.184007    | 4.697328     |
| C(14)       | 2.463179                                       | -3.854080    | 3.942918     | 2.380637                                       | -4.039965    | 4.315397     | 2.666027                                       | -4.084033    | 4.642822     |
| H(2)        | -0.945488                                      | 0.009698     | 1.926688     | -0.945249                                      | 0.006497     | 1.927386     | -0.945294                                      | -0.001604    | 1.927733     |
| H(4)        | 1.145803                                       | -0.006424    | -1.845225    | 1.146307                                       | -0.003129    | -1.843966    | 1.148018                                       | -0.001436    | -1.842621    |
| H(6)        | 3.387844                                       | -0.001735    | 1.839671     | 3.388568                                       | -0.003306    | 1.840568     | 3.388305                                       | 0.003239     | 1.842962     |
| H(7A)       | -1.291320                                      | 0.022220     | 5.818583     | -1.271678                                      | 0.123306     | 5.833549     | -1.271029                                      | -0.041309    | 5.835244     |
| H(7B)       | 0.334676                                       | 0.514099     | 6.288470     | 0.367455                                       | 0.596443     | 6.269175     | 0.327197                                       | 0.562489     | 6.249953     |
| H(8A)       | 0.131314                                       | -1.755319    | 7.069517     | 0.077121                                       | -1.609812    | 7.179218     | 0.162614                                       | -1.605318    | 7.264821     |
| H(8B)       | -0.780962                                      | -2.240664    | 5.633206     | -0.836814                                      | -2.153061    | 5.764062     | -0.687997                                      | -2.275891    | 5.865631     |
| H(9A)       | 2.490582                                       | -1.768990    | 7.024523     | 2.468277                                       | -1.688588    | 7.131042     | 2.612402                                       | -1.527029    | 7.211099     |
| H(9B)       | 3.341753                                       | -2.253755    | 5.550788     | 3.287572                                       | -2.280797    | 5.677700     | 3.442044                                       | -2.121990    | 5.764988     |
| H(10A)      | 3.871495                                       | 0.006615     | 5.730416     | 3.863897                                       | -0.035274    | 5.737276     | 3.849869                                       | 0.153658     | 5.745749     |
| H(10B)      | 2.264769                                       | 0.503928     | 6.257208     | 2.274824                                       | 0.535149     | 6.237061     | 2.225057                                       | 0.626969     | 6.221873     |
| H(12A)      | 1.298410                                       | -5.578701    | 5.768276     | 1.152764                                       | -5.525678    | 6.284409     | 1.541984                                       | -5.446500    | 6.745878     |
| H(12B)      | 0.468750                                       | -4.366797    | 6.762974     | 0.312140                                       | -4.209730    | 7.125237     | 0.589158                                       | -4.128257    | 7.453453     |
| H(12C)      | 2.246287                                       | -4.379428    | 6.668152     | 2.091765                                       | -4.251187    | 7.084514     | 2.366719                                       | -4.031063    | 7.426250     |
| H(13A)      | -0.141527                                      | -3.116831    | 3.265309     | -0.185138                                      | -3.308162    | 3.504176     | 0.054289                                       | -3.616928    | 3.766863     |
| H(13B)      | -0.917599                                      | -3.908344    | 4.660863     | -1.018035                                      | -3.906268    | 4.962743     | -0.740227                                      | -4.127943    | 5.279421     |
| H(13C)      | 0.088110                                       | -4.852864    | 3.570695     | -0.027275                                      | -5.005611    | 4.012161     | 0.333058                                       | -5.240392    | 4.440024     |
| H(14A)      | 3.429825                                       | -3.821973    | 4.458574     | 3.331375                                       | -4.031243    | 4.862067     | 3.611636                                       | -3.939268    | 5.179350     |
| H(14B)      | 2.483206                                       | -3.131761    | 3.117344     | 2.469328                                       | -3.376752    | 3.445350     | 2.704566                                       | -3.519138    | 3.702403     |
| H(14C)      | 2.368685                                       | -4.860968    | 3.517561     | 2.236016                                       | -5.065699    | 3.953955     | 2.601745                                       | -5.152226    | 4.401760     |

**Table 18S.** Cartesian coordinates for **1** with B-N distance constrained to 3.0 Å (*a*), 3.1 Å (*b*) and 3.2 Å (*c*).

| <i>Atom</i> | <i>d</i> <sub>B-N</sub> = 3.0 Å ( <i>a</i> ) |              |              | <i>d</i> <sub>B-N</sub> = 3.1 Å ( <i>b</i> ) |              |              | <i>d</i> <sub>B-N</sub> = 3.2 Å ( <i>c</i> ) |              |              |
|-------------|----------------------------------------------|--------------|--------------|----------------------------------------------|--------------|--------------|----------------------------------------------|--------------|--------------|
|             | <i>x</i> / Å                                 | <i>y</i> / Å | <i>z</i> / Å | <i>x</i> / Å                                 | <i>y</i> / Å | <i>z</i> / Å | <i>x</i> / Å                                 | <i>y</i> / Å | <i>z</i> / Å |
| F(1)        | -1.188457                                    | -0.002651    | -0.662540    | -1.190093                                    | 0.003121     | -0.661941    | -1.190038                                    | -0.000941    | -0.662067    |
| F(2)        | 3.528629                                     | 0.005866     | -0.754377    | 3.527408                                     | -0.012419    | -0.759108    | 3.527562                                     | 0.003851     | -0.758907    |
| O(1)        | 0.029104                                     | 0.083048     | 4.280218     | 0.039922                                     | 0.060417     | 4.288196     | 0.041195                                     | -0.010610    | 4.293993     |
| O(2)        | 2.489467                                     | -0.084295    | 4.245423     | 2.499092                                     | 0.000464     | 4.241719     | 2.494076                                     | -0.010314    | 4.249365     |
| N(1)        | 1.126282                                     | -2.141820    | 5.771331     | 1.263151                                     | -1.996279    | 6.015727     | 1.291461                                     | -2.002024    | 6.151892     |
| B(1)        | 1.249619                                     | -0.015856    | 3.658261     | 1.257668                                     | 0.013238     | 3.655258     | 1.256346                                     | -0.002751    | 3.653557     |
| C(1)        | 1.225040                                     | 0.000000     | 2.081544     | 1.226353                                     | 0.000000     | 2.079434     | 1.226448                                     | 0.000000     | 2.079184     |
| C(2)        | 0.000000                                     | 0.000000     | 1.388667     | 0.000000                                     | 0.000000     | 1.388670     | 0.000000                                     | 0.000000     | 1.388656     |
| C(3)        | 0.000000                                     | 0.000000     | 0.000000     | 0.000000                                     | 0.000000     | 0.000000     | 0.000000                                     | 0.000000     | 0.000000     |
| C(4)        | 1.169305                                     | 0.003023     | -0.754830    | 1.167716                                     | -0.004005    | -0.757227    | 1.167888                                     | 0.001782     | -0.756998    |
| C(5)        | 2.367040                                     | 0.003533     | -0.045486    | 2.365661                                     | -0.007724    | -0.048565    | 2.365824                                     | 0.002334     | -0.048278    |
| C(6)        | 2.422766                                     | -0.000027    | 1.342328     | 2.423348                                     | -0.005665    | 1.338958     | 2.423692                                     | 0.001335     | 1.339255     |
| C(7)        | -0.211842                                    | 0.006230     | 5.682207     | -0.187718                                    | 0.068785     | 5.696801     | -0.176445                                    | 0.050589     | 5.704939     |
| C(8)        | -0.033436                                    | -1.412308    | 6.268461     | 0.049553                                     | -1.285971    | 6.398892     | 0.083626                                     | -1.258850    | 6.487870     |
| C(9)        | 2.759133                                     | -0.209262    | 5.639315     | 2.772729                                     | 0.022279     | 5.641815     | 2.770191                                     | 0.026780     | 5.651015     |
| C(10)       | 2.398805                                     | -1.594060    | 6.223293     | 2.494981                                     | -1.307859    | 6.380618     | 2.537261                                     | -1.294312    | 6.418684     |
| C(11)       | 1.014575                                     | -3.636853    | 5.784973     | 1.255500                                     | -3.477387    | 6.245842     | 1.281235                                     | -3.455959    | 6.515014     |
| C(12)       | 1.015310                                     | -4.204621    | 7.221646     | 1.276381                                     | -3.830537    | 7.749539     | 1.317153                                     | -3.670508    | 8.044537     |
| C(13)       | -0.284102                                    | -4.064061    | 5.065037     | 0.003857                                     | -4.099002    | 5.589640     | 0.018588                                     | -4.126896    | 5.933293     |
| C(14)       | 2.183870                                     | -4.250802    | 4.984000     | 2.479025                                     | -4.112018    | 5.551286     | 2.494764                                     | -4.159370    | 5.870595     |
| H(2)        | -0.945183                                    | 0.000832     | 1.927660     | -0.944894                                    | 0.003800     | 1.927977     | -0.944852                                    | -0.001986    | 1.928064     |
| H(4)        | 1.149266                                     | 0.004649     | -1.842508    | 1.145796                                     | -0.004082    | -1.844669    | 1.146164                                     | 0.002778     | -1.844445    |
| H(6)        | 3.388759                                     | -0.003852    | 1.843136     | 3.389849                                     | -0.007281    | 1.838526     | 3.390127                                     | 0.000439     | 1.838997     |
| H(7A)       | -1.261647                                    | 0.294363     | 5.828928     | -1.249629                                    | 0.316739     | 5.829123     | -1.242783                                    | 0.282060     | 5.831798     |
| H(7B)       | 0.390398                                     | 0.750198     | 6.213882     | 0.378607                                     | 0.878068     | 6.168571     | 0.372579                                     | 0.895104     | 6.132860     |
| H(8A)       | -0.027137                                    | -1.296419    | 7.373867     | 0.001288                                     | -1.071316    | 7.489434     | 0.038937                                     | -0.967599    | 7.561554     |
| H(8B)       | -0.930257                                    | -1.979153    | 6.014320     | -0.805951                                    | -1.920541    | 6.162907     | -0.771706                                    | -1.911002    | 6.304872     |
| H(9A)       | 2.455263                                     | -1.492242    | 7.328902     | 2.548850                                     | -1.067847    | 7.465439     | 2.663905                                     | -1.029563    | 7.492769     |
| H(9B)       | 3.192168                                     | -2.281986    | 5.927710     | 3.331815                                     | -1.973430    | 6.163316     | 3.363105                                     | -1.959165    | 6.159939     |
| H(10A)      | 3.843412                                     | -0.075853    | 5.754022     | 3.848582                                     | 0.223131     | 5.735606     | 3.842142                                     | 0.250923     | 5.737304     |
| H(10B)      | 2.286241                                     | 0.607476     | 6.194442     | 2.259691                                     | 0.866410     | 6.113751     | 2.243699                                     | 0.865449     | 6.116907     |
| H(12A)      | 1.952024                                     | -3.970064    | 7.745645     | 1.251782                                     | -4.920204    | 7.889368     | 2.224996                                     | -3.240435    | 8.488585     |
| H(12B)      | 0.908565                                     | -5.298245    | 7.204012     | 0.406535                                     | -3.409993    | 8.272307     | 1.307724                                     | -4.743067    | 8.283394     |
| H(12C)      | 0.181292                                     | -3.798319    | 7.810226     | 2.185760                                     | -3.454073    | 8.237541     | 0.445804                                     | -3.214810    | 8.534012     |
| H(13A)      | -0.375034                                    | -3.553318    | 4.097733     | -0.105499                                    | -3.747780    | 4.555432     | -0.103331                                    | -3.868975    | 4.873331     |
| H(13B)      | -1.186935                                    | -3.865800    | 5.655437     | -0.921560                                    | -3.879819    | 6.135281     | -0.898052                                    | -3.853830    | 6.469603     |
| H(13C)      | -0.258061                                    | -5.145732    | 4.883550     | 0.107926                                     | -5.191144    | 5.574454     | 0.117014                                     | -5.216652    | 6.014107     |
| H(14A)      | 3.146168                                     | -4.182973    | 5.505235     | 3.425229                                     | -3.891069    | 6.059392     | 3.444814                                     | -3.906102    | 6.355916     |
| H(14B)      | 2.277951                                     | -3.762477    | 4.005288     | 2.551009                                     | -3.771490    | 4.510288     | 2.566008                                     | -3.908748    | 4.804277     |
| H(14C)      | 1.989229                                     | -5.318188    | 4.821157     | 2.369897                                     | -5.203783    | 5.551551     | 2.374659                                     | -5.246046    | 5.962362     |



**Table 19S.** Cartesian coordinates for **1** with B-N distance constrained to 3.3 Å.

| <i>Atom</i> | $d_{\text{B-N}} = 3.3 \text{ \AA}$ |                |                |
|-------------|------------------------------------|----------------|----------------|
|             | $x / \text{Å}$                     | $y / \text{Å}$ | $z / \text{Å}$ |
| F(1)        | -1.190015                          | -0.001280      | -0.662032      |
| F(2)        | 3.527550                           | 0.005691       | -0.759615      |
| O(1)        | 0.046935                           | -0.053229      | 4.301482       |
| O(2)        | 2.490848                           | 0.008035       | 4.256718       |
| N(1)        | 1.326206                           | -1.921763      | 6.333069       |
| B(1)        | 1.256489                           | 0.000022       | 3.651301       |
| C(1)        | 1.226843                           | 0.000000       | 2.078550       |
| C(2)        | 0.000000                           | 0.000000       | 1.388623       |
| C(3)        | 0.000000                           | 0.000000       | 0.000000       |
| C(4)        | 1.167874                           | 0.002092       | -0.757166      |
| C(5)        | 2.365891                           | 0.003504       | -0.048668      |
| C(6)        | 2.424205                           | 0.003060       | 1.338773       |
| C(7)        | -0.167285                          | 0.094917       | 5.708682       |
| C(8)        | 0.136054                           | -1.130917      | 6.616670       |
| C(9)        | 2.769291                           | 0.086200       | 5.659285       |
| C(10)       | 2.591338                           | -1.215055      | 6.473081       |
| C(11)       | 1.291344                           | -3.334956      | 6.823830       |
| C(12)       | 1.256839                           | -3.405969      | 8.367172       |
| C(13)       | 0.055426                           | -4.050929      | 6.237546       |
| C(14)       | 2.532420                           | -4.094933      | 6.310307       |
| H(2)        | -0.944730                          | -0.003045      | 1.928264       |
| H(4)        | 1.145616                           | 0.002775       | -1.844571      |
| H(6)        | 3.390627                           | 0.003566       | 1.838551       |
| H(7A)       | -1.241269                          | 0.295999       | 5.821465       |
| H(7B)       | 0.348912                           | 0.992063       | 6.065687       |
| H(8A)       | 0.129717                           | -0.717669      | 7.650573       |
| H(8B)       | -0.725081                          | -1.798040      | 6.547310       |
| H(9A)       | 2.809263                           | -0.915511      | 7.524544       |
| H(9B)       | 3.393086                           | -1.889533      | 6.166340       |
| H(10A)      | 3.834686                           | 0.343490       | 5.732348       |
| H(10B)      | 2.221652                           | 0.920762       | 6.107408       |
| H(12A)      | 0.343194                           | -2.949495      | 8.770873       |
| H(12B)      | 2.120989                           | -2.888742      | 8.806174       |
| H(12C)      | 1.285511                           | -4.450339      | 8.707279       |
| H(13A)      | -0.011106                          | -3.873824      | 5.156698       |
| H(13B)      | -0.886475                          | -3.736334      | 6.702694       |
| H(13C)      | 0.142590                           | -5.131389      | 6.408485       |
| H(14A)      | 2.667124                           | -3.940463      | 5.231653       |
| H(14B)      | 3.453882                           | -3.801538      | 6.827702       |
| H(14C)      | 2.396228                           | -5.168723      | 6.487633       |

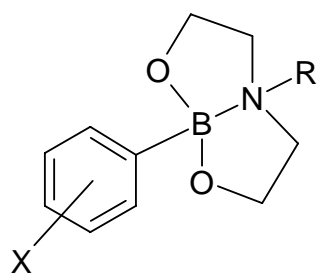

**Table 20S.** Cartesian coordinates for azaester derivative ( $X = 4\text{-Br}$ ,  $R = \text{Bu}$ ) with B-N distance constrained to 1.5 Å (*a*), 1.6 Å (*b*) and 1.7 Å (*c*).

| Atom   | $d_{\text{B-N}} = 1.5 \text{ \AA} (a)$ |                   |                   | $d_{\text{B-N}} = 1.6 \text{ \AA} (b)$ |                   |                   | $d_{\text{B-N}} = 1.7 \text{ \AA} (c)$ |                   |                   |
|--------|----------------------------------------|-------------------|-------------------|----------------------------------------|-------------------|-------------------|----------------------------------------|-------------------|-------------------|
|        | $x / \text{ \AA}$                      | $y / \text{ \AA}$ | $z / \text{ \AA}$ | $x / \text{ \AA}$                      | $y / \text{ \AA}$ | $z / \text{ \AA}$ | $x / \text{ \AA}$                      | $y / \text{ \AA}$ | $z / \text{ \AA}$ |
| C(1)   | 1.186229                               | 0.000000          | 2.155051          | 1.196508                               | 0.000000          | 2.137391          | 1.188600                               | 0.000000          | 2.151238          |
| C(2)   | 0.000000                               | 0.000000          | 1.400509          | 0.000000                               | 0.000000          | 1.398797          | 0.000000                               | 0.000000          | 1.400032          |
| C(3)   | 0.000000                               | 0.000000          | 0.000000          | 0.000000                               | 0.000000          | 0.000000          | 0.000000                               | 0.000000          | 0.000000          |
| C(4)   | 1.223797                               | 0.012498          | -0.667631         | 1.206492                               | 0.007633          | -0.707791         | 1.223916                               | 0.014121          | -0.668441         |
| C(5)   | 2.429433                               | 0.036407          | 0.034352          | 2.395745                               | 0.022568          | 0.021983          | 2.430800                               | 0.037331          | 0.031635          |
| C(6)   | 2.394216                               | 0.029622          | 1.433279          | 2.406010                               | 0.020588          | 1.416328          | 2.396902                               | 0.029774          | 1.430580          |
| H(2)   | -0.960102                              | 0.033309          | 1.917110          | -0.951224                              | 0.030390          | 1.930950          | -0.957490                              | 0.021256          | 1.921600          |
| H(3)   | -0.933958                              | 0.005130          | -0.559960         | -0.941410                              | 0.006398          | -0.551673         | -0.933784                              | 0.002284          | -0.560292         |
| H(5)   | 3.377289                               | 0.069112          | -0.500952         | 1.220945                               | 0.012535          | -1.796019         | 3.378010                               | 0.068291          | -0.504763         |
| H(6)   | 3.337868                               | 0.072210          | 1.978342          | 3.352514                               | 0.054616          | 1.952734          | 3.340086                               | 0.066853          | 1.976836          |
| B(1)   | 1.155887                               | 0.010029          | 3.776742          | 1.192665                               | -0.021840         | 3.753455          | 1.163362                               | -0.025742         | 3.758130          |
| O(1)   | -0.101281                              | 0.654613          | 4.279013          | -0.037182                              | 0.601274          | 4.302561          | -0.102551                              | 0.487327          | 4.304785          |
| O(2)   | 2.368680                               | 0.656175          | 4.292144          | 2.437603                               | 0.528308          | 4.280586          | 2.379635                               | 0.522029          | 4.328053          |
| N(1)   | 1.135753                               | -1.319555         | 4.470861          | 1.146957                               | -1.470516         | 4.431133          | 1.173337                               | -1.579524         | 4.447812          |
| C(7)   | -0.884566                              | -0.226256         | 5.039703          | -0.721096                              | -0.226247         | 5.206953          | -0.702622                              | -0.349607         | 5.259991          |
| C(8)   | -0.321239                              | -1.613298         | 4.726396          | -0.287914                              | -1.644997         | 4.842685          | -0.240530                              | -1.763662         | 4.901781          |
| C(9)   | 2.386792                               | 0.388139          | 5.673470          | 2.518011                               | 0.144011          | 5.631190          | 2.492280                               | 0.077182          | 5.657352          |
| C(10)  | 1.890999                               | -1.068392         | 5.783453          | 2.071335                               | -1.330182         | 5.634602          | 2.136983                               | -1.422119         | 5.603935          |
| C(11)  | 1.789295                               | -2.442288         | 3.699907          | 1.601421                               | -2.592890         | 3.537693          | 1.608351                               | -2.667466         | 3.514561          |
| H(11A) | 1.294876                               | -2.474837         | 2.724655          | 0.976723                               | -2.549501         | 2.640074          | 0.946943                               | -2.617412         | 2.643107          |
| H(11B) | 2.824522                               | -2.126252         | 3.527784          | 2.623728                               | -2.345513         | 3.229471          | 2.612195                               | -2.395735         | 3.167624          |
| C(12)  | 1.739334                               | -3.818398         | 4.361900          | 1.542687                               | -3.988935         | 4.156736          | 1.602957                               | -4.078076         | 4.104530          |
| H(11A) | 2.160582                               | -3.785548         | 5.377291          | 2.124691                               | -4.026757         | 5.089370          | 2.224421                               | -4.119769         | 5.011586          |
| H(11B) | 0.696489                               | -4.151415         | 4.464109          | 0.505619                               | -4.241766         | 4.421562          | 0.582820                               | -4.355537         | 4.408520          |
| C(13)  | 2.514059                               | -4.853072         | 3.532675          | 2.083024                               | -5.047667         | 3.184991          | 2.121672                               | -5.108249         | 3.091725          |
| H(13A) | 2.101014                               | -4.883500         | 2.512836          | 1.505376                               | -5.008948         | 2.248719          | 1.505905                               | -5.062677         | 2.180309          |
| H(13B) | 3.560284                               | -4.525789         | 3.431314          | 3.120789                               | -4.797233         | 2.916443          | 3.143058                               | -4.833072         | 2.786497          |
| C(14)  | 2.472963                               | -6.255661         | 4.145180          | 2.030563                               | -6.465173         | 3.761379          | 2.119525                               | -6.537321         | 3.641351          |
| H(14A) | 2.912112                               | -6.262285         | 5.153509          | 2.628598                               | -6.542808         | 4.681124          | 2.755154                               | -6.620535         | 4.535086          |
| H(14B) | 3.035516                               | -6.971210         | 3.530821          | 2.423925                               | -7.197876         | 3.044147          | 2.497505                               | -7.248730         | 2.894917          |
| H(14C) | 1.440010                               | -6.624268         | 4.226645          | 0.998943                               | -6.757215         | 4.006523          | 1.104251                               | -6.854035         | 3.921552          |
| H(7A)  | -0.816767                              | -0.002384         | 6.122188          | -0.466070                              | 0.010384          | 6.258325          | -0.405310                              | -0.082333         | 6.291757          |
| H(7B)  | -1.948544                              | -0.162629         | 4.760131          | -1.810341                              | -0.107302         | 5.099820          | -1.798771                              | -0.269848         | 5.204287          |
| H(8A)  | -0.443051                              | -2.360712         | 5.516751          | -0.388391                              | -2.382841         | 5.645979          | -0.313685                              | -2.489504         | 5.720030          |
| H(8B)  | -0.736306                              | -2.001325         | 3.789271          | -0.833615                              | -1.993308         | 3.958262          | -0.809220                              | -2.132163         | 4.040154          |
| H(9A)  | 1.723743                               | 1.072924          | 6.227623          | 1.864481                               | 0.762542          | 6.269498          | 1.812718                               | 0.627152          | 6.330165          |
| H(9B)  | 3.406845                               | 0.494249          | 6.068372          | 3.550150                               | 0.246637          | 5.993794          | 3.520052                               | 0.225941          | 6.016628          |
| H(10A) | 1.226626                               | -1.254909         | 6.632761          | 1.554340                               | -1.644771         | 6.547308          | 1.692669                               | -1.805648         | 6.529287          |
| H(10B) | 2.726374                               | -1.770026         | 5.832021          | 2.929507                               | -1.987339         | 5.473744          | 3.031347                               | -2.009221         | 5.377850          |
| Br(1)  | 1.250912                               | 0.012971          | -2.593101         | 4.071858                               | 0.050979          | -0.933420         | 1.249019                               | 0.015096          | -2.593556         |

**Table 21S.** Cartesian coordinates for azaester derivative (X = 4-Br, R = Bu) with B-N distance constrained to 1.8 Å (a), 1.9 Å (b) and 2.0 Å (c).

| Atom   | $d_{\text{B-N}} = 1.8 \text{ \AA} \text{ (a)}$ |                   |                   | $d_{\text{B-N}} = 1.9 \text{ \AA} \text{ (b)}$ |                   |                   | $d_{\text{B-N}} = 2.0 \text{ \AA} \text{ (c)}$ |                   |                   |
|--------|------------------------------------------------|-------------------|-------------------|------------------------------------------------|-------------------|-------------------|------------------------------------------------|-------------------|-------------------|
|        | $x / \text{ \AA}$                              | $y / \text{ \AA}$ | $z / \text{ \AA}$ | $x / \text{ \AA}$                              | $y / \text{ \AA}$ | $z / \text{ \AA}$ | $x / \text{ \AA}$                              | $y / \text{ \AA}$ | $z / \text{ \AA}$ |
| C(1)   | 1.189473                                       | 0.000000          | 2.149924          | 1.190510                                       | 0.000000          | 2.148755          | 1.191456                                       | 0.000000          | 2.147405          |
| C(2)   | 0.000000                                       | 0.000000          | 1.399793          | 0.000000                                       | 0.000000          | 1.399253          | 0.000000                                       | 0.000000          | 1.399045          |
| C(3)   | 0.000000                                       | 0.000000          | 0.000000          | 0.000000                                       | 0.000000          | 0.000000          | 0.000000                                       | 0.000000          | 0.000000          |
| C(4)   | 1.223896                                       | 0.003594          | -0.668840         | 1.224472                                       | 0.000311          | -0.668668         | 1.224408                                       | 0.003479          | -0.668956         |
| C(5)   | 2.431333                                       | 0.016082          | 0.030619          | 2.432067                                       | 0.008164          | 0.030091          | 2.432649                                       | 0.013467          | 0.029004          |
| C(6)   | 2.398234                                       | 0.013619          | 1.429309          | 2.399417                                       | 0.006849          | 1.428982          | 2.400623                                       | 0.010700          | 1.427589          |
| H(2)   | -0.957616                                      | 0.025584          | 1.921063          | -0.956433                                      | 0.024014          | 1.922365          | -0.955723                                      | 0.016457          | 1.923389          |
| H(3)   | -0.934123                                      | 0.006992          | -0.559626         | -0.933725                                      | 0.007923          | -0.560187         | -0.933742                                      | 0.005319          | -0.560143         |
| H(5)   | 3.378219                                       | 0.034873          | -0.506888         | 3.379007                                       | 0.021827          | -0.507412         | 3.379131                                       | 0.028748          | -0.509185         |
| H(6)   | 3.341306                                       | 0.041301          | 1.975820          | 3.342224                                       | 0.028207          | 1.976089          | 3.343465                                       | 0.031670          | 1.974556          |
| B(1)   | 1.168756                                       | -0.015505         | 3.750117          | 1.167303                                       | -0.023078         | 3.743549          | 1.170317                                       | -0.036001         | 3.736546          |
| O(1)   | -0.070938                                      | 0.498202          | 4.317577          | -0.067387                                      | 0.456729          | 4.313194          | -0.079496                                      | 0.337184          | 4.322906          |
| O(2)   | 2.413037                                       | 0.430245          | 4.327071          | 2.421788                                       | 0.335244          | 4.339759          | 2.412777                                       | 0.300235          | 4.348486          |
| N(1)   | 1.118969                                       | -1.665432         | 4.467936          | 1.074022                                       | -1.777021         | 4.468105          | 1.136748                                       | -1.899429         | 4.462155          |
| C(7)   | -0.642824                                      | -0.288983         | 5.332510          | -0.552804                                      | -0.263316         | 5.420554          | -0.500480                                      | -0.400384         | 5.446680          |
| C(8)   | -0.272536                                      | -1.736164         | 4.996283          | -0.255596                                      | -1.740228         | 5.130429          | -0.169712                                      | -1.872338         | 5.156174          |
| C(9)   | 2.543625                                       | -0.062994         | 5.637817          | 2.629418                                       | -0.270536         | 5.592665          | 2.661595                                       | -0.345832         | 5.575113          |
| C(10)  | 2.156234                                       | -1.554272         | 5.550501          | 2.221899                                       | -1.746501         | 5.420161          | 2.311109                                       | -1.832713         | 5.365870          |
| C(11)  | 1.420694                                       | -2.767285         | 3.508092          | 1.188078                                       | -2.867940         | 3.463082          | 1.239530                                       | -2.968160         | 3.439725          |
| H(11A) | 0.705563                                       | -2.671861         | 2.683360          | 0.397804                                       | -2.701562         | 2.721372          | 0.419738                                       | -2.810102         | 2.727777          |
| H(11B) | 2.412910                                       | -2.557640         | 3.090783          | 2.142011                                       | -2.720461         | 2.941997          | 2.170577                                       | -2.791707         | 2.886321          |
| C(12)  | 1.370298                                       | -4.179772         | 4.093629          | 1.099978                                       | -4.289335         | 4.024394          | 1.205195                                       | -4.401689         | 3.978208          |
| H(11A) | 2.078569                                       | -4.272100         | 4.930970          | 1.876112                                       | -4.442225         | 4.789864          | 2.015479                                       | -4.547246         | 4.709297          |
| H(11B) | 0.369431                                       | -4.381291         | 4.504144          | 0.131284                                       | -4.435263         | 4.526183          | 0.261451                                       | -4.576423         | 4.517426          |
| C(13)  | 1.700526                                       | -5.238740         | 3.033029          | 1.261941                                       | -5.345301         | 2.923201          | 1.345922                                       | -5.437455         | 2.855528          |
| H(13A) | 0.996640                                       | -5.139704         | 2.192368          | 0.490668                                       | -5.187442         | 2.153336          | 0.539153                                       | -5.288142         | 2.120993          |
| H(13B) | 2.701586                                       | -5.038651         | 2.620490          | 2.230826                                       | -5.198817         | 2.421036          | 2.288770                                       | -5.259242         | 2.315313          |
| C(14)  | 1.648125                                       | -6.668226         | 3.579083          | 1.170839                                       | -6.779504         | 3.451739          | 1.313017                                       | -6.881225         | 3.364558          |
| H(14A) | 2.368654                                       | -6.808106         | 4.398154          | 1.955336                                       | -6.979441         | 4.196286          | 2.131969                                       | -7.071284         | 4.073800          |
| H(14B) | 1.886611                                       | -7.400137         | 2.795677          | 1.287198                                       | -7.509456         | 2.639305          | 1.414860                                       | -7.596222         | 2.536924          |
| H(14C) | 0.647865                                       | -6.908613         | 3.968196          | 0.198773                                       | -6.965105         | 3.931720          | 0.366413                                       | -7.099153         | 3.880514          |
| H(7A)  | -0.271023                                      | -0.008028         | 6.334861          | -0.085211                                      | 0.062806          | 6.365481          | -0.015262                                      | -0.053480         | 6.373798          |
| H(7B)  | -1.734881                                      | -0.157071         | 5.338799          | -1.635818                                      | -0.099421         | 5.516688          | -1.584325                                      | -0.269542         | 5.575655          |
| H(8A)  | -0.354065                                      | -2.424754         | 5.846817          | -0.286032                                      | -2.372251         | 6.028213          | -0.170827                                      | -2.490117         | 6.065942          |
| H(8B)  | -0.910382                                      | -2.098742         | 4.181691          | -0.989834                                      | -2.118720         | 4.410032          | -0.917631                                      | -2.274176         | 4.462844          |
| H(9A)  | 1.897118                                       | 0.482308          | 6.345198          | 2.046792                                       | 0.221568          | 6.388349          | 2.078312                                       | 0.097976          | 6.397410          |
| H(9B)  | 3.583115                                       | 0.051683          | 5.975236          | 3.691812                                       | -0.192732         | 5.863299          | 3.725238                                       | -0.235293         | 5.828530          |
| H(10A) | 1.781575                                       | -1.966140         | 6.495457          | 1.969862                                       | -2.236169         | 6.370043          | 2.127332                                       | -2.356179         | 6.314884          |
| H(10B) | 3.028177                                       | -2.137732         | 5.239662          | 3.050872                                       | -2.293301         | 4.958690          | 3.148378                                       | -2.325121         | 4.859318          |
| Br(1)  | 1.247393                                       | 0.001544          | -2.593541         | 1.248031                                       | -0.001608         | -2.593089         | 1.247277                                       | 0.001440          | -2.593026         |

**Table 22S.** Cartesian coordinates for azaester derivative (X = 4-Br, R = Bu) with B-N distance constrained to 2.1 Å (a), 2.2 Å (b) and 2.3 Å (c).

| Atom   | $d_{\text{B-N}} = 2.1 \text{ \AA} \text{ (a)}$ |                  |                  | $d_{\text{B-N}} = 2.2 \text{ \AA} \text{ (b)}$ |                  |                  | $d_{\text{B-N}} = 2.3 \text{ \AA} \text{ (c)}$ |                  |                  |
|--------|------------------------------------------------|------------------|------------------|------------------------------------------------|------------------|------------------|------------------------------------------------|------------------|------------------|
|        | $x / \text{\AA}$                               | $y / \text{\AA}$ | $z / \text{\AA}$ | $x / \text{\AA}$                               | $y / \text{\AA}$ | $z / \text{\AA}$ | $x / \text{\AA}$                               | $y / \text{\AA}$ | $z / \text{\AA}$ |
| C(1)   | 1.192625                                       | 0.000000         | 2.145879         | 1.193266                                       | 0.000000         | 2.144962         | 1.194051                                       | 0.000000         | 2.143885         |
| C(2)   | 0.000000                                       | 0.000000         | 1.398757         | 0.000000                                       | 0.000000         | 1.398508         | 0.000000                                       | 0.000000         | 1.398254         |
| C(3)   | 0.000000                                       | 0.000000         | 0.000000         | 0.000000                                       | 0.000000         | 0.000000         | 0.000000                                       | 0.000000         | 0.000000         |
| C(4)   | 1.224131                                       | 0.002941         | -0.669747        | 1.224233                                       | 0.001826         | -0.669695        | 1.224043                                       | -0.001462        | -0.670222        |
| C(5)   | 2.432981                                       | 0.012132         | 0.027287         | 2.433480                                       | 0.008946         | 0.026813         | 2.433674                                       | 0.001468         | 0.025679         |
| C(6)   | 2.401746                                       | 0.010557         | 1.425586         | 2.402775                                       | 0.008209         | 1.424882         | 2.403591                                       | 0.002478         | 1.423578         |
| H(2)   | -0.955103                                      | 0.012108         | 1.924004         | -0.954757                                      | 0.009866         | 1.924237         | -0.954479                                      | 0.010300         | 1.924308         |
| H(3)   | -0.933868                                      | 0.004482         | -0.559917        | -0.933881                                      | 0.004324         | -0.559843        | -0.934002                                      | 0.004981         | -0.559611        |
| H(5)   | 3.379033                                       | 0.025762         | -0.511651        | 3.379350                                       | 0.019849         | -0.512453        | 3.379377                                       | 0.007565         | -0.513895        |
| H(6)   | 3.344777                                       | 0.030904         | 1.972043         | 3.345813                                       | 0.025403         | 1.971266         | 3.346657                                       | 0.014990         | 1.969801         |
| B(1)   | 1.175096                                       | -0.034934        | 3.730681         | 1.176049                                       | -0.030733        | 3.726449         | 1.178489                                       | -0.019358        | 3.723141         |
| O(1)   | -0.081995                                      | 0.247711         | 4.323895         | -0.081866                                      | 0.192303         | 4.322331         | -0.074603                                      | 0.180908         | 4.317671         |
| O(2)   | 2.410155                                       | 0.280399         | 4.349876         | 2.409130                                       | 0.245864         | 4.348061         | 2.416444                                       | 0.201764         | 4.341297         |
| N(1)   | 1.194103                                       | -1.992047        | 4.491831         | 1.213770                                       | -2.068729        | 4.554189         | 1.187650                                       | -2.118944        | 4.662104         |
| C(7)   | -0.427998                                      | -0.464864        | 5.490186         | -0.414314                                      | -0.504854        | 5.503626         | -0.389398                                      | -0.449921        | 5.542001         |
| C(8)   | -0.074680                                      | -1.942632        | 5.240970         | -0.055129                                      | -1.987726        | 5.289515         | -0.061100                                      | -1.950842        | 5.409433         |
| C(9)   | 2.713776                                       | -0.392733        | 5.550757         | 2.707216                                       | -0.403546        | 5.565057         | 2.714960                                       | -0.420486        | 5.574042         |
| C(10)  | 2.408065                                       | -1.886648        | 5.323724         | 2.423085                                       | -1.907928        | 5.374036         | 2.415437                                       | -1.927363        | 5.438150         |
| C(11)  | 1.252459                                       | -3.063131        | 3.474796         | 1.282746                                       | -3.166398        | 3.572247         | 1.209109                                       | -3.275783        | 3.752499         |
| H(11A) | 0.394399                                       | -2.918386        | 2.805456         | 0.424407                                       | -3.050692        | 2.896776         | 0.337027                                       | -3.184777        | 3.090152         |
| H(11B) | 2.150931                                       | -2.882437        | 2.870327         | 2.181066                                       | -2.998381        | 2.962996         | 2.096372                                       | -3.169656        | 3.112968         |
| C(12)  | 1.261935                                       | -4.495638        | 4.019665         | 1.303123                                       | -4.584507        | 4.156435         | 1.212286                                       | -4.655846        | 4.424199         |
| H(11A) | 2.111044                                       | -4.626836        | 4.708435         | 2.153515                                       | -4.688823        | 4.848490         | 2.084573                                       | -4.740706        | 5.091334         |
| H(11B) | 0.349617                                       | -4.676467        | 4.609044         | 0.392435                                       | -4.754123        | 4.751947         | 0.320114                                       | -4.758888        | 5.061830         |
| C(13)  | 1.355613                                       | -5.537006        | 2.897529         | 1.403348                                       | -5.657253        | 3.065296         | 1.240888                                       | -5.799903        | 3.404038         |
| H(13A) | 0.512288                                       | -5.398811        | 2.202812         | 0.558482                                       | -5.545055        | 2.367590         | 0.370993                                       | -5.710165        | 2.734286         |
| H(13B) | 2.269087                                       | -5.353936        | 2.310401         | 2.315050                                       | -5.484921        | 2.472002         | 2.131414                                       | -5.693088        | 2.764618         |
| C(14)  | 1.360579                                       | -6.978233        | 3.414912         | 1.418777                                       | -7.083408        | 3.622897         | 1.243171                                       | -7.186648        | 4.053793         |
| H(14A) | 2.215015                                       | -7.157013        | 4.084149         | 2.276079                                       | -7.238128        | 4.294459         | 2.122004                                       | -7.320264        | 4.701635         |
| H(14B) | 1.427954                                       | -7.697411        | 2.587293         | 1.488326                                       | -7.825387        | 2.815740         | 1.262953                                       | -7.981520        | 3.295640         |
| H(14C) | 0.442510                                       | -7.201107        | 3.978202         | 0.503662                                       | -7.295873        | 4.195001         | 0.346232                                       | -7.336731        | 4.672583         |
| H(7A)  | 0.086473                                       | -0.069626        | 6.380004         | 0.098148                                       | -0.085864        | 6.382588         | 0.144421                                       | 0.011714         | 6.385003         |
| H(7B)  | -1.508137                                      | -0.356113        | 5.661362         | -1.494626                                      | -0.399557        | 5.674762         | -1.464407                                      | -0.317597        | 5.726160         |
| H(8A)  | -0.028765                                      | -2.514038        | 6.180977         | -0.024495                                      | -2.529898        | 6.248935         | -0.030744                                      | -2.427894        | 6.404249         |
| H(8B)  | -0.850250                                      | -2.388165        | 4.607221         | -0.829248                                      | -2.448231        | 4.664369         | -0.859751                                      | -2.430632        | 4.831185         |
| H(9A)  | 2.146408                                       | 0.013943         | 6.402200         | 2.131344                                       | 0.017455         | 6.402654         | 2.154961                                       | 0.034120         | 6.403820         |
| H(9B)  | 3.781149                                       | -0.253180        | 5.771943         | 3.771435                                       | -0.246857        | 5.789063         | 3.783235                                       | -0.269392        | 5.781433         |
| H(10A) | 2.309251                                       | -2.430081        | 6.275931         | 2.345102                                       | -2.421886        | 6.345979         | 2.369750                                       | -2.402205        | 6.433431         |
| H(10B) | 3.235696                                       | -2.333330        | 4.760968         | 3.259429                                       | -2.353208        | 4.822735         | 3.235794                                       | -2.394718        | 4.880485         |
| Br(1)  | 1.245526                                       | -0.000019        | -2.593373        | 1.245313                                       | -0.001006        | -2.592981        | 1.244302                                       | -0.004113        | -2.593309        |

**Table 23S.** Cartesian coordinates for azaester derivative (X = 4-Br, R = Bu) with B-N distance constrained to 2.4 Å (a), 2.5 Å (b) and 2.6 Å (c).

| Atom   | $d_{\text{B-N}} = 2.4 \text{ \AA} \text{ (a)}$ |                   |                   | $d_{\text{B-N}} = 2.5 \text{ \AA} \text{ (b)}$ |                   |                   | $d_{\text{B-N}} = 2.6 \text{ \AA} \text{ (c)}$ |                   |                   |
|--------|------------------------------------------------|-------------------|-------------------|------------------------------------------------|-------------------|-------------------|------------------------------------------------|-------------------|-------------------|
|        | $x / \text{ \AA}$                              | $y / \text{ \AA}$ | $z / \text{ \AA}$ | $x / \text{ \AA}$                              | $y / \text{ \AA}$ | $z / \text{ \AA}$ | $x / \text{ \AA}$                              | $y / \text{ \AA}$ | $z / \text{ \AA}$ |
| C(1)   | 1.194473                                       | 0.000000          | 2.143228          | 1.194672                                       | 0.000000          | 2.142652          | 1.194885                                       | 0.000000          | 2.142250          |
| C(2)   | 0.000000                                       | 0.000000          | 1.398030          | 0.000000                                       | 0.000000          | 1.397853          | 0.000000                                       | 0.000000          | 1.397818          |
| C(3)   | 0.000000                                       | 0.000000          | 0.000000          | 0.000000                                       | 0.000000          | 0.000000          | 0.000000                                       | 0.000000          | 0.000000          |
| C(4)   | 1.224022                                       | 0.002863          | -0.670463         | 1.224136                                       | -0.003177         | -0.670300         | 1.224094                                       | 0.000552          | -0.670345         |
| C(5)   | 2.433844                                       | 0.008663          | 0.025221          | 2.434102                                       | -0.003533         | 0.025196          | 2.434097                                       | 0.002442          | 0.025059          |
| C(6)   | 2.404098                                       | 0.006891          | 1.422925          | 2.404508                                       | -0.001532         | 1.422751          | 2.404857                                       | 0.001900          | 1.422574          |
| H(2)   | -0.954574                                      | 0.004917          | 1.923942          | -0.954550                                      | 0.007187          | 1.923719          | -0.954517                                      | 0.002803          | 1.923713          |
| H(3)   | -0.933997                                      | 0.002061          | -0.559614         | -0.933973                                      | 0.004185          | -0.559626         | -0.934111                                      | 0.001667          | -0.559385         |
| H(5)   | 3.379373                                       | 0.017286          | -0.514589         | 3.379618                                       | -0.002007         | -0.514686         | 3.379629                                       | 0.005985          | -0.514777         |
| H(6)   | 3.347333                                       | 0.017548          | 1.968840          | 3.347801                                       | 0.004634          | 1.968581          | 3.348255                                       | 0.006156          | 1.968171          |
| B(1)   | 1.179388                                       | -0.031616         | 3.720591          | 1.179150                                       | -0.006446         | 3.719483          | 1.179129                                       | -0.016422         | 3.718485          |
| O(1)   | -0.071958                                      | 0.128405          | 4.315505          | -0.070349                                      | 0.144977          | 4.307088          | -0.069783                                      | 0.097147          | 4.304756          |
| O(2)   | 2.418059                                       | 0.139949          | 4.338567          | 2.418153                                       | 0.138380          | 4.330782          | 2.416588                                       | 0.094846          | 4.329176          |
| N(1)   | 1.179700                                       | -2.196916         | 4.755712          | 1.161155                                       | -2.175522         | 4.962375          | 1.162739                                       | -2.211732         | 5.111447          |
| C(7)   | -0.378073                                      | -0.463311         | 5.563033          | -0.373384                                      | -0.342517         | 5.600902          | -0.366326                                      | -0.325863         | 5.624004          |
| C(8)   | -0.064261                                      | -1.971845         | 5.488353          | -0.080014                                      | -1.854859         | 5.659470          | -0.078864                                      | -1.833081         | 5.772932          |
| C(9)   | 2.708717                                       | -0.450906         | 5.590223          | 2.694960                                       | -0.352472         | 5.629328          | 2.686966                                       | -0.330823         | 5.653349          |
| C(10)  | 2.409881                                       | -1.962029         | 5.508244          | 2.392386                                       | -1.863144         | 5.680429          | 2.394100                                       | -1.837548         | 5.794116          |
| C(11)  | 1.191299                                       | -3.397322         | 3.908434          | 1.162665                                       | -3.476505         | 4.280772          | 1.165328                                       | -3.559462         | 4.532252          |
| H(11A) | 0.316610                                       | -3.337247         | 3.245376          | 0.287187                                       | -3.498802         | 3.615918          | 0.290015                                       | -3.633540         | 3.870383          |
| H(11B) | 2.076168                                       | -3.330321         | 3.259702          | 2.047876                                       | -3.503947         | 3.629107          | 2.050829                                       | -3.636056         | 3.884344          |
| C(12)  | 1.190645                                       | -4.744211         | 4.646395          | 1.152287                                       | -4.717384         | 5.186932          | 1.155879                                       | -4.731761         | 5.526244          |
| H(11A) | 2.068270                                       | -4.802601         | 5.309490          | 2.031219                                       | -4.697903         | 5.850482          | 2.032494                                       | -4.661838         | 6.189521          |
| H(11B) | 0.303397                                       | -4.809264         | 5.295921          | 0.266338                                       | -4.690404         | 5.840819          | 0.267637                                       | -4.660798         | 6.173773          |
| C(13)  | 1.202485                                       | -5.936240         | 3.682476          | 1.151244                                       | -6.024059         | 4.385031          | 1.161331                                       | -6.092555         | 4.820289          |
| H(13A) | 0.325524                                       | -5.873891         | 3.018772          | 0.273865                                       | -6.039193         | 3.719054          | 0.286433                                       | -6.157838         | 4.153927          |
| H(13B) | 2.086221                                       | -5.864736         | 3.028735          | 2.034732                                       | -6.045568         | 3.727336          | 2.047218                                       | -6.158439         | 4.168668          |
| C(14)  | 1.205464                                       | -7.290623         | 4.397306          | 1.142626                                       | -7.274654         | 5.269002          | 1.152800                                       | -7.277599         | 5.790276          |
| H(14A) | 2.090549                                       | -7.397512         | 5.041609          | 2.027030                                       | -7.304470         | 5.922370          | 2.035661                                       | -7.259761         | 6.446228          |
| H(14B) | 1.213585                                       | -8.120885         | 3.677779          | 1.143035                                       | -8.191444         | 4.663463          | 1.156203                                       | -8.234918         | 5.251019          |
| H(14C) | 0.314567                                       | -7.406576         | 5.031968          | 0.251124                                       | -7.298996         | 5.912886          | 0.259887                                       | -7.258332         | 6.432445          |
| H(7A)  | 0.161822                                       | 0.026731          | 6.384946          | 0.171540                                       | 0.212104          | 6.376185          | 0.178593                                       | 0.271787          | 6.365839          |
| H(7B)  | -1.451119                                      | -0.317957         | 5.748203          | -1.444442                                      | -0.171847         | 5.775250          | -1.436998                                      | -0.145444         | 5.790396          |
| H(8A)  | -0.048828                                      | -2.402316         | 6.505997          | -0.084618                                      | -2.187979         | 6.714481          | -0.099311                                      | -2.096436         | 6.848589          |
| H(8B)  | -0.869964                                      | -2.464102         | 4.930334          | -0.891828                                      | -2.380810         | 5.142007          | -0.890723                                      | -2.385616         | 5.283518          |
| H(9A)  | 2.150865                                       | 0.032940          | 6.403868          | 2.138944                                       | 0.203944          | 6.395461          | 2.128757                                       | 0.266351          | 6.385673          |
| H(9B)  | 3.777175                                       | -0.296154         | 5.793463          | 3.763558                                       | -0.187780         | 5.823403          | 3.754521                                       | -0.152486         | 5.840675          |
| H(10A) | 2.382393                                       | -2.394320         | 6.524887          | 2.377750                                       | -2.198031         | 6.734806          | 2.396449                                       | -2.103244         | 6.869419          |
| H(10B) | 3.228664                                       | -2.446026         | 4.962139          | 3.209652                                       | -2.392813         | 5.175478          | 3.212707                                       | -2.390667         | 5.316707          |
| Br(1)  | 1.244084                                       | 0.001197          | -2.593236         | 1.244266                                       | -0.005440         | -2.592861         | 1.244037                                       | -0.000481         | -2.592709         |

**Table 24S.** Cartesian coordinates for azaester derivative (X = 4-Br, R = Bu) with B-N distance constrained to 2.7 Å (a), 2.8 Å (b) and 2.9 Å (c).

| Atom   | $d_{\text{B-N}} = 2.7 \text{ \AA}$ (a) |                   |                   | $d_{\text{B-N}} = 2.8 \text{ \AA}$ (b) |                   |                   | $d_{\text{B-N}} = 2.9 \text{ \AA}$ (c) |                   |                   |
|--------|----------------------------------------|-------------------|-------------------|----------------------------------------|-------------------|-------------------|----------------------------------------|-------------------|-------------------|
|        | $x / \text{ \AA}$                      | $y / \text{ \AA}$ | $z / \text{ \AA}$ | $x / \text{ \AA}$                      | $y / \text{ \AA}$ | $z / \text{ \AA}$ | $x / \text{ \AA}$                      | $y / \text{ \AA}$ | $z / \text{ \AA}$ |
| C(1)   | 1.194384                               | 0.000000          | 2.142683          | 1.195386                               | 0.000000          | 2.141229          | 1.195608                               | 0.000000          | 2.140767          |
| C(2)   | 0.000000                               | 0.000000          | 1.397771          | 0.000000                               | 0.000000          | 1.397743          | 0.000000                               | 0.000000          | 1.397707          |
| C(3)   | 0.000000                               | 0.000000          | 0.000000          | 0.000000                               | 0.000000          | 0.000000          | 0.000000                               | 0.000000          | 0.000000          |
| C(4)   | 1.224601                               | -0.003995         | -0.669423         | 1.223921                               | -0.005625         | -0.670614         | 1.224006                               | 0.005155          | -0.670503         |
| C(5)   | 2.434296                               | -0.007402         | 0.026683          | 2.434129                               | -0.009419         | 0.024464          | 2.434278                               | 0.009836          | 0.024467          |
| C(6)   | 2.404945                               | -0.006217         | 1.424217          | 2.405451                               | -0.005734         | 1.421889          | 2.405883                               | 0.006854          | 1.421873          |
| H(2)   | -0.954602                              | 0.006529          | 1.923464          | -0.954463                              | 0.005180          | 1.923733          | -0.954332                              | -0.005405         | 1.923948          |
| H(3)   | -0.933991                              | 0.003212          | -0.559507         | -0.934268                              | 0.003678          | -0.559095         | -0.934322                              | -0.001859         | -0.558999         |
| H(5)   | 3.380097                               | -0.009307         | -0.512688         | 3.379571                               | -0.012932         | -0.515491         | 3.379706                               | 0.014929          | -0.515503         |
| H(6)   | 3.348167                               | -0.006836         | 1.970171          | 3.349027                               | -0.004543         | 1.967184          | 3.349410                               | 0.008311          | 1.967260          |
| B(1)   | 1.174100                               | 0.000754          | 3.718557          | 1.180619                               | 0.014881          | 3.716457          | 1.180669                               | -0.023185         | 3.714831          |
| O(1)   | -0.070468                              | 0.154603          | 4.296135          | -0.065504                              | 0.084809          | 4.300886          | -0.063125                              | -0.022208         | 4.305282          |
| O(2)   | 2.410681                               | 0.037095          | 4.331571          | 2.414905                               | 0.105436          | 4.322755          | 2.410760                               | 0.047733          | 4.329051          |
| N(1)   | 1.049594                               | -2.161878         | 5.330240          | 1.182668                               | -2.101750         | 5.549452          | 1.228843                               | -2.189895         | 5.641757          |
| C(7)   | -0.384294                              | -0.151809         | 5.644881          | -0.350063                              | -0.131828         | 5.674985          | -0.344222                              | -0.233809         | 5.682864          |
| C(8)   | -0.176438                              | -1.651749         | 5.926151          | -0.065692                              | -1.586935         | 6.090390          | -0.036965                              | -1.673969         | 6.135129          |
| C(9)   | 2.653252                               | -0.291099         | 5.690048          | 2.677575                               | -0.105052         | 5.702127          | 2.668284                               | -0.135742         | 5.715288          |
| C(10)  | 2.294987                               | -1.763701         | 5.970280          | 2.411412                               | -1.564719         | 6.113416          | 2.443233                               | -1.590266         | 6.169562          |
| C(11)  | 0.989733                               | -3.570840         | 4.928990          | 1.197779                               | -3.553840         | 5.346336          | 1.279754                               | -3.647532         | 5.510595          |
| H(11A) | 0.126161                               | -3.684391         | 4.256745          | 0.324194                               | -3.808515         | 4.727951          | 0.417618                               | -3.953498         | 4.898958          |
| H(11B) | 1.883709                               | -3.778693         | 4.322996          | 2.086285                               | -3.792628         | 4.743030          | 2.178768                               | -3.894676         | 4.926153          |
| C(12)  | 0.889563                               | -4.603525         | 6.063974          | 1.194513                               | -4.423707         | 6.614820          | 1.285921                               | -4.458070         | 6.818215          |
| H(11A) | 1.753929                               | -4.498587         | 6.738721          | 2.070422                               | -4.176438         | 7.235063          | 2.149932                               | -4.162190         | 7.433965          |
| H(11B) | -0.006879                              | -4.399152         | 6.670404          | 0.305619                               | -4.189257         | 7.221428          | 0.386134                               | -4.218475         | 7.406512          |
| C(13)  | 0.827999                               | -6.042383         | 5.538769          | 1.207953                               | -5.923139         | 6.295987          | 1.337957                               | -5.969177         | 6.566171          |
| H(13A) | -0.025520                              | -6.139245         | 4.848833          | 0.334399                               | -6.168543         | 5.671109          | 0.478179                               | -6.261745         | 5.942398          |
| H(13B) | 1.729730                               | -6.248315         | 4.940300          | 2.095534                               | -6.155823         | 5.686169          | 2.238138                               | -6.206977         | 5.977102          |
| C(14)  | 0.703931                               | -7.087654         | 6.651191          | 1.203669                               | -6.806233         | 7.547403          | 1.338350                               | -6.798234         | 7.853920          |
| H(14A) | 1.558821                               | -7.036635         | 7.341607          | 2.084242                               | -6.606963         | 8.175763          | 2.206457                               | -6.552732         | 8.483352          |
| H(14B) | 0.666607                               | -8.105938         | 6.240048          | 1.214921                               | -7.872962         | 7.284129          | 1.376808                               | -7.874599         | 7.636296          |
| H(14C) | -0.211079                              | -6.931116         | 7.241246          | 0.308467                               | -6.621643         | 8.159350          | 0.431822                               | -6.608805         | 8.447496          |
| H(7A)  | 0.186692                               | 0.479172          | 6.336985          | 0.187693                               | 0.586726          | 6.304802          | 0.170970                               | 0.508077          | 6.303857          |
| H(7B)  | -1.444991                              | 0.093470          | 5.791190          | -1.421746                              | 0.066880          | 5.811736          | -1.421029                              | -0.058845         | 5.812141          |
| H(8A)  | -0.233244                              | -1.812581         | 7.021647          | -0.123925                              | -1.640945         | 7.197292          | -0.123701                              | -1.695626         | 7.242407          |
| H(8B)  | -1.010454                              | -2.201435         | 5.471423          | -0.871341                              | -2.216956         | 5.691685          | -0.823477                              | -2.328884         | 5.737633          |
| H(9A)  | 2.124730                               | 0.395311          | 6.362852          | 2.115413                               | 0.604253          | 6.321064          | 2.088602                               | 0.574569          | 6.315982          |
| H(9B)  | 3.727669                               | -0.147636         | 5.867854          | 3.742803                               | 0.112854          | 5.858702          | 3.727328                               | 0.110827          | 5.871749          |
| H(10A) | 2.295177                               | -1.920391         | 7.067937          | 2.449719                               | -1.617318         | 7.221240          | 2.497587                               | -1.601776         | 7.278992          |
| H(10B) | 3.090047                               | -2.392896         | 5.550463          | 3.235478                               | -2.180497         | 5.730373          | 3.282459                               | -2.194097         | 5.800030          |
| Br(1)  | 1.245674                               | -0.004427         | -2.591769         | 1.243265                               | -0.007252         | -2.592798         | 1.243265                               | 0.005619          | -2.592519         |

**Table 25S.** Cartesian coordinates for azaester derivative (X = 4-Br, R = Bu) with B-N distance constrained to 3.0 Å (a), 3.1 Å (b) and 3.2 Å (c).

| Atom   | $d_{\text{B-N}} = 3.0 \text{ \AA} \text{ (a)}$ |                   |                   | $d_{\text{B-N}} = 3.1 \text{ \AA} \text{ (b)}$ |                   |                   | $d_{\text{B-N}} = 3.2 \text{ \AA} \text{ (c)}$ |                   |                   |
|--------|------------------------------------------------|-------------------|-------------------|------------------------------------------------|-------------------|-------------------|------------------------------------------------|-------------------|-------------------|
|        | $x / \text{ \AA}$                              | $y / \text{ \AA}$ | $z / \text{ \AA}$ | $x / \text{ \AA}$                              | $y / \text{ \AA}$ | $z / \text{ \AA}$ | $x / \text{ \AA}$                              | $y / \text{ \AA}$ | $z / \text{ \AA}$ |
| C(1)   | 1.194567                                       | 0.000000          | 2.141925          | 1.196032                                       | 0.000000          | 2.139935          | 1.196472                                       | 0.000000          | 2.139208          |
| C(2)   | 0.000000                                       | 0.000000          | 1.397543          | 0.000000                                       | 0.000000          | 1.397609          | 0.000000                                       | 0.000000          | 1.397553          |
| C(3)   | 0.000000                                       | 0.000000          | 0.000000          | 0.000000                                       | 0.000000          | 0.000000          | 0.000000                                       | 0.000000          | 0.000000          |
| C(4)   | 1.225042                                       | -0.004199         | -0.668902         | 1.224079                                       | -0.003674         | -0.670503         | 1.224002                                       | 0.003170          | -0.670745         |
| C(5)   | 2.434763                                       | -0.009436         | 0.027374          | 2.434584                                       | -0.006725         | 0.024227          | 2.434729                                       | 0.005439          | 0.023699          |
| C(6)   | 2.405721                                       | -0.008887         | 1.424823          | 2.406593                                       | -0.003974         | 1.421519          | 2.407119                                       | 0.003752          | 1.420911          |
| H(2)   | -0.954703                                      | 0.005545          | 1.923088          | -0.954283                                      | 0.002499          | 1.924026          | -0.954123                                      | -0.003218         | 1.924277          |
| H(3)   | -0.933826                                      | 0.002247          | -0.559689         | -0.934274                                      | 0.002162          | -0.559015         | -0.934319                                      | -0.001401         | -0.558938         |
| H(5)   | 3.380454                                       | -0.013311         | -0.512120         | 3.379827                                       | -0.009695         | -0.516035         | 3.379825                                       | 0.008143          | -0.516810         |
| H(6)   | 3.348997                                       | -0.014174         | 1.970766          | 3.350188                                       | -0.004490         | 1.966859          | 3.350731                                       | 0.003540          | 1.966239          |
| B(1)   | 1.172110                                       | 0.006799          | 3.715212          | 1.180932                                       | 0.015703          | 3.712086          | 1.182219                                       | -0.006808         | 3.709940          |
| O(1)   | -0.066315                                      | 0.140220          | 4.299009          | -0.056868                                      | 0.034341          | 4.311770          | -0.051679                                      | -0.019098         | 4.318959          |
| O(2)   | 2.395035                                       | -0.062384         | 4.341450          | 2.407045                                       | 0.039795          | 4.334922          | 2.405468                                       | -0.009544         | 4.340194          |
| N(1)   | 0.956135                                       | -2.038516         | 5.899254          | 1.164450                                       | -1.962780         | 6.098576          | 1.168098                                       | -1.986110         | 6.224331          |
| C(7)   | -0.360555                                      | 0.101055          | 5.690363          | -0.333089                                      | 0.044225          | 5.709588          | -0.324625                                      | 0.017358          | 5.719224          |
| C(8)   | -0.230395                                      | -1.305242         | 6.305688          | -0.088256                                      | -1.300304         | 6.419910          | -0.087741                                      | -1.302373         | 6.480558          |
| C(9)   | 2.631811                                       | -0.161664         | 5.741834          | 2.656386                                       | 0.053392          | 5.737831          | 2.653773                                       | 0.028831          | 5.744936          |
| C(10)  | 2.244795                                       | -1.529397         | 6.336023          | 2.405114                                       | -1.291282         | 6.446192          | 2.414084                                       | -1.292745         | 6.501944          |
| C(11)  | 0.822244                                       | -3.494080         | 5.982412          | 1.166108                                       | -3.403534         | 6.350772          | 1.170738                                       | -3.402290         | 6.584055          |
| H(11A) | -0.076791                                      | -3.776044         | 5.413706          | 0.295200                                       | -3.830780         | 5.830567          | 0.294710                                       | -3.867293         | 6.106337          |
| H(11B) | 1.678467                                       | -3.934902         | 5.450002          | 2.058132                                       | -3.823226         | 5.861250          | 2.058404                                       | -3.860261         | 6.121224          |
| C(12)  | 0.737465                                       | -4.098881         | 7.394794          | 1.142559                                       | -3.849703         | 7.823748          | 1.159251                                       | -3.733112         | 8.087656          |
| H(11A) | 1.635898                                       | -3.825014         | 7.970096          | 2.013820                                       | -3.432243         | 8.352642          | 2.035726                                       | -3.277574         | 8.574837          |
| H(11B) | -0.121478                                      | -3.666515         | 7.931741          | 0.248905                                       | -3.441786         | 8.321736          | 0.270806                                       | -3.284724         | 8.559547          |
| C(13)  | 0.599981                                       | -5.625448         | 7.368591          | 1.147979                                       | -5.375825         | 7.967376          | 1.163110                                       | -5.243108         | 8.352310          |
| H(13A) | -0.298302                                      | -5.898173         | 6.791714          | 0.279319                                       | -5.792461         | 7.432674          | 0.288508                                       | -5.699140         | 7.861176          |
| H(13B) | 1.455460                                       | -6.056899         | 6.824579          | 2.040052                                       | -5.783512         | 7.465366          | 2.049650                                       | -5.692034         | 7.876248          |
| C(14)  | 0.517022                                       | -6.249363         | 8.764760          | 1.123161                                       | -5.847491         | 9.424323          | 1.151785                                       | -5.596174         | 9.842440          |
| H(14A) | 1.419948                                       | -6.027450         | 9.352561          | 1.999411                                       | -5.476466         | 9.976271          | 2.033885                                       | -5.183821         | 10.354208         |
| H(14B) | 0.414533                                       | -7.341988         | 8.708954          | 1.126587                                       | -6.944396         | 9.489854          | 1.154473                                       | -6.684287         | 9.995682          |
| H(14C) | -0.347700                                      | -5.860090         | 9.322219          | 0.223960                                       | -5.483956         | 9.943352          | 0.258144                                       | -5.190345         | 10.339190         |
| H(7A)  | 0.239533                                       | 0.840201          | 6.232986          | 0.203003                                       | 0.863942          | 6.200471          | 0.207654                                       | 0.851836          | 6.188369          |
| H(7B)  | -1.408642                                      | 0.413855          | 5.793383          | -1.403626                                      | 0.271351          | 5.806986          | -1.395712                                      | 0.244641          | 5.810711          |
| H(8A)  | -0.320097                                      | -1.180887         | 7.406504          | -0.219273                                      | -1.100371         | 7.506279          | -0.247867                                      | -1.053884         | 7.553832          |
| H(8B)  | -1.094596                                      | -1.898974         | 5.979236          | -0.890500                                      | -1.990425         | 6.125316          | -0.884907                                      | -2.004122         | 6.198720          |
| H(9A)  | 2.148729                                       | 0.665036          | 6.274904          | 2.106601                                       | 0.871273          | 6.216519          | 2.106954                                       | 0.858992          | 6.204929          |
| H(9B)  | 3.713911                                       | -0.032979         | 5.881134          | 3.723591                                       | 0.286657          | 5.855203          | 3.721296                                       | 0.264498          | 5.855026          |
| H(10A) | 2.333565                                       | -1.433559         | 7.440176          | 2.510462                                       | -1.087788         | 7.534756          | 2.553911                                       | -1.043163         | 7.577767          |
| H(10B) | 2.997741                                       | -2.262691         | 6.017518          | 3.218168                                       | -1.976854         | 6.171416          | 3.221270                                       | -1.988311         | 6.233647          |
| Br(1)  | 1.246544                                       | -0.003198         | -2.590886         | 1.242984                                       | -0.004008         | -2.592232         | 1.242470                                       | 0.004397          | -2.592226         |

**Table 26S.** Cartesian coordinates for azaester derivative (X = 4-Br, R = Bu) with B-N distance constrained to 3.3 Å (*a*).

| <i>Atom</i> | <i>d</i> <sub>B-N</sub> = 3.3 Å ( <i>a</i> ) |              |              |
|-------------|----------------------------------------------|--------------|--------------|
|             | <i>x</i> / Å                                 | <i>y</i> / Å | <i>z</i> / Å |
| C(1)        | 1.196721                                     | 0.000000     | 2.138727     |
| C(2)        | 0.000000                                     | 0.000000     | 1.397496     |
| C(3)        | 0.000000                                     | 0.000000     | 0.000000     |
| C(4)        | 1.224101                                     | 0.007926     | -0.670629    |
| C(5)        | 2.434983                                     | 0.013768     | 0.023603     |
| C(6)        | 2.407554                                     | 0.008852     | 1.420768     |
| H(2)        | -0.954018                                    | -0.007050    | 1.924405     |
| H(3)        | -0.934218                                    | -0.003868    | -0.559040    |
| H(5)        | 3.379919                                     | 0.020347     | -0.517098    |
| H(6)        | 3.351125                                     | 0.008448     | 1.966202     |
| B(1)        | 1.182795                                     | -0.023261    | 3.707823     |
| O(1)        | -0.047720                                    | -0.052410    | 4.325062     |
| O(2)        | 2.402335                                     | -0.057969    | 4.346063     |
| N(1)        | 1.155418                                     | -1.986220    | 6.360377     |
| C(7)        | -0.320592                                    | 0.013205     | 5.726342     |
| C(8)        | -0.102479                                    | -1.280807    | 6.538686     |
| C(9)        | 2.646891                                     | 0.011206     | 5.752415     |
| C(10)       | 2.408997                                     | -1.279920    | 6.564344     |
| C(11)       | 1.151267                                     | -3.362830    | 6.847262     |
| H(11A)      | 0.273687                                     | -3.866143    | 6.412585     |
| H(11B)      | 2.037907                                     | -3.864895    | 6.429842     |
| C(12)       | 1.136426                                     | -3.557434    | 8.374950     |
| H(11A)      | 2.007823                                     | -3.053948    | 8.821967     |
| H(11B)      | 0.243234                                     | -3.074777    | 8.801598     |
| C(13)       | 1.149311                                     | -5.038082    | 8.769592     |
| H(13A)      | 0.283346                                     | -5.542250    | 8.311217     |
| H(13B)      | 2.044057                                     | -5.518151    | 8.341735     |
| C(14)       | 1.126253                                     | -5.263503    | 10.284333    |
| H(14A)      | 1.997732                                     | -4.798132    | 10.768155    |
| H(14B)      | 1.140569                                     | -6.334653    | 10.529327    |
| H(14C)      | 0.222483                                     | -4.829097    | 10.736644    |
| H(7A)       | 0.212027                                     | 0.858134     | 6.175444     |
| H(7B)       | -1.391088                                    | 0.246664     | 5.808893     |
| H(8A)       | -0.299188                                    | -0.983982    | 7.594070     |
| H(8B)       | -0.894783                                    | -1.990902    | 6.262372     |
| H(9A)       | 2.107595                                     | 0.859192     | 6.187612     |
| H(9B)       | 3.716060                                     | 0.242363     | 5.856053     |
| H(10A)      | 2.581719                                     | -0.978937    | 7.622702     |
| H(10B)      | 3.206952                                     | -1.991627    | 6.309329     |
| Br(1)       | 1.242406                                     | 0.010364     | -2.592028    |



**Table 27S.** Cartesian coordinates for azaester derivative ( $X = 3\text{-Br}$ ,  $R = \text{Bu}$ ) with B-N distance constrained to 1.5 Å (*a*), 1.6 Å (*b*) and 1.7 Å (*c*).

| Atom   | $d_{\text{B-N}} = 1.5 \text{ \AA} \text{ (a)}$ |                   |                   | $d_{\text{B-N}} = 1.6 \text{ \AA} \text{ (b)}$ |                   |                   | $d_{\text{B-N}} = 1.7 \text{ \AA} \text{ (c)}$ |                   |                   |
|--------|------------------------------------------------|-------------------|-------------------|------------------------------------------------|-------------------|-------------------|------------------------------------------------|-------------------|-------------------|
|        | $x / \text{ \AA}$                              | $y / \text{ \AA}$ | $z / \text{ \AA}$ | $x / \text{ \AA}$                              | $y / \text{ \AA}$ | $z / \text{ \AA}$ | $x / \text{ \AA}$                              | $y / \text{ \AA}$ | $z / \text{ \AA}$ |
| C(1)   | 1.212955                                       | 0.000000          | 2.109568          | 1.212509                                       | 0.000000          | 2.109133          | 1.215965                                       | 0.000000          | 2.105162          |
| C(2)   | 0.000000                                       | 0.000000          | 1.394616          | 0.000000                                       | 0.000000          | 1.395065          | 0.000000                                       | 0.000000          | 1.394311          |
| C(3)   | 0.000000                                       | 0.000000          | 0.000000          | 0.000000                                       | 0.000000          | 0.000000          | 0.000000                                       | 0.000000          | 0.000000          |
| C(4)   | 1.183124                                       | 0.027761          | -0.737564         | 1.184635                                       | 0.019489          | -0.736049         | 1.183850                                       | 0.006130          | -0.738333         |
| C(5)   | 2.392913                                       | 0.058528          | -0.035511         | 2.395391                                       | 0.043814          | -0.034119         | 2.395760                                       | 0.017624          | -0.040050         |
| C(6)   | 2.404217                                       | 0.042726          | 1.363045          | 2.405276                                       | 0.036134          | 1.363768          | 2.407583                                       | 0.014429          | 1.358527          |
| H(2)   | -0.946754                                      | 0.026873          | 1.931589          | -0.943305                                      | 0.020413          | 1.937384          | -0.942972                                      | 0.019969          | 1.937812          |
| H(3)   | 1.161886                                       | 0.036383          | -1.825630         | 1.164902                                       | 0.026746          | -1.824240         | 1.160928                                       | 0.010807          | -1.826439         |
| H(5)   | 3.330329                                       | 0.100299          | -0.592604         | 3.332821                                       | 0.079348          | -0.591527         | 3.332513                                       | 0.037972          | -0.599237         |
| H(6)   | 3.356157                                       | 0.083863          | 1.892066          | 3.358459                                       | 0.083457          | 1.891122          | 3.360867                                       | 0.049768          | 1.885927          |
| B(1)   | 1.221914                                       | -0.028778         | 3.735323          | 1.214672                                       | 0.011176          | 3.727541          | 1.233862                                       | -0.025149         | 3.714142          |
| O(1)   | 0.011391                                       | 0.696605          | 4.235187          | -0.075227                                      | 0.528722          | 4.236750          | 0.015482                                       | 0.525547          | 4.275167          |
| O(2)   | 2.493206                                       | 0.541134          | 4.223266          | 2.407624                                       | 0.704092          | 4.221873          | 2.498541                                       | 0.492280          | 4.256509          |
| N(1)   | 1.129694                                       | -1.367093         | 4.406447          | 1.311455                                       | -1.414287         | 4.447740          | 1.226566                                       | -1.577508         | 4.407056          |
| C(7)   | -0.612519                                      | -0.016225         | 5.273963          | -0.579929                                      | -0.231988         | 5.305143          | -0.135494                                      | 0.062751          | 5.592977          |
| C(8)   | -0.293284                                      | -1.470014         | 4.932865          | -0.060777                                      | -1.647649         | 5.031985          | 0.214855                                       | -1.441053         | 5.523725          |
| C(9)   | 2.653215                                       | 0.142493          | 5.559349          | 2.641671                                       | 0.307006          | 5.548234          | 3.066236                                       | -0.311205         | 5.258387          |
| C(10)  | 2.141519                                       | -1.318265         | 5.560307          | 2.360833                                       | -1.216159         | 5.533739          | 2.624339                                       | -1.738284         | 4.918033          |
| C(11)  | 1.440368                                       | -2.544440         | 3.508125          | 1.703029                                       | -2.545810         | 3.534543          | 0.850359                                       | -2.678286         | 3.461788          |
| H(11A) | 0.757522                                       | -2.470637         | 2.656914          | 0.987177                                       | -2.541318         | 2.706021          | -0.143625                                      | -2.427687         | 3.073549          |
| H(11B) | 2.451155                                       | -2.375460         | 3.119695          | 2.677376                                       | -2.276928         | 3.111462          | 1.545164                                       | -2.619968         | 2.617205          |
| C(12)  | 1.328486                                       | -3.923294         | 4.156862          | 1.762296                                       | -3.928662         | 4.183685          | 0.857320                                       | -4.085233         | 4.060176          |
| H(11A) | 1.997735                                       | -4.004136         | 5.025595          | 2.447748                                       | -3.925055         | 5.044151          | 1.874597                                       | -4.352302         | 4.383178          |
| H(11B) | 0.307052                                       | -4.089066         | 4.527547          | 0.771912                                       | -4.208945         | 4.569909          | 0.221074                                       | -4.126684         | 4.957005          |
| C(13)  | 1.678478                                       | -5.029112         | 3.150631          | 2.223219                                       | -4.992446         | 3.177241          | 0.364516                                       | -5.125072         | 3.044254          |
| H(13A) | 1.034276                                       | -4.930047         | 2.263774          | 1.534538                                       | -4.998799         | 2.318457          | -0.659343                                      | -4.868407         | 2.731671          |
| H(13B) | 2.711300                                       | -4.883736         | 2.798459          | 3.209900                                       | -4.711317         | 2.777986          | 0.985588                                       | -5.068011         | 2.136975          |
| C(14)  | 1.530352                                       | -6.434665         | 3.738755          | 2.296717                                       | -6.395626         | 3.785486          | 0.389491                                       | -6.553942         | 3.593474          |
| H(14A) | 2.179629                                       | -6.569798         | 4.616138          | 3.009698                                       | -6.429610         | 4.622229          | 1.408295                                       | -6.851769         | 3.881547          |
| H(14B) | 1.801535                                       | -7.201734         | 3.001190          | 2.621115                                       | -7.133964         | 3.039924          | 0.030738                                       | -7.272020         | 2.843936          |
| H(14C) | 0.494660                                       | -6.626083         | 4.055185          | 1.316129                                       | -6.715089         | 4.167535          | -0.251579                                      | -6.649689         | 4.482080          |
| H(7A)  | -0.216615                                      | 0.250395          | 6.271910          | -0.233949                                      | 0.138992          | 6.287933          | 0.528863                                       | 0.597016          | 6.293330          |
| H(7B)  | -1.696445                                      | 0.174365          | 5.284486          | -1.679874                                      | -0.202692         | 5.309449          | -1.171467                                      | 0.212721          | 5.927357          |
| H(8A)  | -0.361477                                      | -2.200703         | 5.744895          | -0.014330                                      | -2.317709         | 5.896622          | 0.612952                                       | -1.850393         | 6.459055          |
| H(8B)  | -0.919314                                      | -1.792226         | 4.093889          | -0.669544                                      | -2.110580         | 4.247365          | -0.673196                                      | -2.013228         | 5.241197          |
| H(9A)  | 2.066812                                       | 0.772801          | 6.249833          | 1.982096                                       | 0.833373          | 6.259666          | 2.728850                                       | -0.018105         | 6.270346          |
| H(9B)  | 3.709949                                       | 0.202847          | 5.857981          | 3.682645                                       | 0.520110          | 5.830657          | 4.162958                                       | -0.225483         | 5.240041          |
| H(10A) | 1.670017                                       | -1.653425         | 6.489298          | 2.010610                                       | -1.632553         | 6.483822          | 2.670462                                       | -2.445801         | 5.753634          |
| H(10B) | 2.960130                                       | -1.997538         | 5.311857          | 3.262836                                       | -1.751426         | 5.224607          | 3.227986                                       | -2.121737         | 4.087253          |
| Br(1)  | -1.685198                                      | -0.021210         | -0.941815         | -1.683253                                      | -0.012186         | -0.943335         | -1.683557                                      | -0.004170         | -0.942670         |

**Table 28S.** Cartesian coordinates for azaester derivative ( $X = 3\text{-Br}$ ,  $R = \text{Bu}$ ) with B-N distance constrained to 1.8 Å (*a*), 1.9 Å (*b*) and 2.0 Å (*c*).

| Atom   | $d_{\text{B-N}} = 1.8 \text{ \AA}$ ( <i>a</i> ) |                |                | $d_{\text{B-N}} = 1.9 \text{ \AA}$ ( <i>b</i> ) |                |                | $d_{\text{B-N}} = 2.0 \text{ \AA}$ ( <i>c</i> ) |                |                |
|--------|-------------------------------------------------|----------------|----------------|-------------------------------------------------|----------------|----------------|-------------------------------------------------|----------------|----------------|
|        | $x / \text{Å}$                                  | $y / \text{Å}$ | $z / \text{Å}$ | $x / \text{Å}$                                  | $y / \text{Å}$ | $z / \text{Å}$ | $x / \text{Å}$                                  | $y / \text{Å}$ | $z / \text{Å}$ |
| C(1)   | 1.213887                                        | 0.000000       | 2.107448       | 1.214949                                        | 0.000000       | 2.105917       | 1.216137                                        | 0.000000       | 2.104260       |
| C(2)   | 0.000000                                        | 0.000000       | 1.394169       | 0.000000                                        | 0.000000       | 1.394150       | 0.000000                                        | 0.000000       | 1.394104       |
| C(3)   | 0.000000                                        | 0.000000       | 0.000000       | 0.000000                                        | 0.000000       | 0.000000       | 0.000000                                        | 0.000000       | 0.000000       |
| C(4)   | 1.186059                                        | 0.003768       | -0.734966      | 1.185963                                        | 0.006488       | -0.735150      | 1.185716                                        | 0.008146       | -0.735576      |
| C(5)   | 2.397078                                        | 0.010891       | -0.034091      | 2.397688                                        | 0.015303       | -0.035412      | 2.398164                                        | 0.018026       | -0.037123      |
| C(6)   | 2.407841                                        | 0.007324       | 1.364359       | 2.409173                                        | 0.010284       | 1.362727       | 2.410463                                        | 0.012362       | 1.360702       |
| H(2)   | -0.943301                                       | 0.026783       | 1.936599       | -0.942535                                       | 0.019950       | 1.937953       | -0.941814                                       | 0.014213       | 1.939087       |
| H(3)   | 1.166264                                        | 0.008562       | -1.823176      | 1.165485                                        | 0.011117       | -1.823361      | 1.164383                                        | 0.012310       | -1.823786      |
| H(5)   | 3.334478                                        | 0.026880       | -0.592308      | 3.334609                                        | 0.032463       | -0.594295      | 3.334581                                        | 0.035414       | -0.596753      |
| H(6)   | 3.359603                                        | 0.032312       | 1.894821       | 3.361006                                        | 0.033585       | 1.893045       | 3.362416                                        | 0.034006       | 1.890715       |
| B(1)   | 1.215247                                        | -0.012585      | 3.711282       | 1.219202                                        | -0.027166      | 3.703278       | 1.224472                                        | -0.037076      | 3.695983       |
| O(1)   | -0.001412                                       | 0.545180       | 4.264245       | -0.010119                                       | 0.437433       | 4.284725       | -0.014368                                       | 0.332177       | 4.299003       |
| O(2)   | 2.488047                                        | 0.398378       | 4.268747       | 2.482231                                        | 0.345469       | 4.279977       | 2.478917                                        | 0.303164       | 4.284725       |
| N(1)   | 1.116337                                        | -1.657246      | 4.436061       | 1.155119                                        | -1.784330      | 4.423188       | 1.206478                                        | -1.901098      | 4.420619       |
| C(7)   | -0.393782                                       | -0.065965      | 5.467979       | -0.381522                                       | -0.219778      | 5.472237       | -0.354269                                       | -0.356678      | 5.479708       |
| C(8)   | -0.126355                                       | -1.564374      | 5.267438       | -0.088335                                       | -1.710878      | 5.239782       | -0.033320                                       | -1.841160      | 5.229833       |
| C(9)   | 2.810648                                        | -0.265928      | 5.465029       | 2.804731                                        | -0.338144      | 5.466962       | 2.811741                                        | -0.392770      | 5.463325       |
| C(10)  | 2.369497                                        | -1.720479      | 5.252815       | 2.404947                                        | -1.803620      | 5.232253       | 2.456124                                        | -1.869656      | 5.215652       |
| C(11)  | 1.041032                                        | -2.767286      | 3.439174       | 1.111343                                        | -2.868167      | 3.404447       | 1.187890                                        | -2.968916      | 3.391751       |
| H(11A) | 0.165509                                        | -2.568405      | 2.810683       | 0.234487                                        | -2.676512      | 2.774468       | 0.306278                                        | -2.791341      | 2.763151       |
| H(11B) | 1.920764                                        | -2.670923      | 2.792272       | 1.991777                                        | -2.737454      | 2.763652       | 2.064550                                        | -2.810366      | 2.751087       |
| C(12)  | 0.962904                                        | -4.174916      | 4.032711       | 1.063539                                        | -4.292453      | 3.962802       | 1.175250                                        | -4.402955      | 3.929328       |
| H(11A) | 1.851992                                        | -4.376541      | 4.648883       | 1.952041                                        | -4.484441      | 4.583378       | 2.063677                                        | -4.576670      | 4.555840       |
| H(11B) | 0.091738                                        | -4.256004      | 4.700273       | 0.188862                                        | -4.409209      | 4.620783       | 0.298789                                        | -4.551713      | 4.578698       |
| C(13)  | 0.856808                                        | -5.242328      | 2.935193       | 0.993760                                        | -5.338385      | 2.842311       | 1.145037                                        | -5.436869      | 2.796270       |
| H(13A) | -0.032999                                       | -5.040255      | 2.319336       | 0.105539                                        | -5.144075      | 2.221508       | 0.258049                                        | -5.259292      | 2.168521       |
| H(13B) | 1.722921                                        | -5.156566      | 2.260690       | 1.864263                                        | -5.217907      | 2.178752       | 2.018563                                        | -5.284346      | 2.143287       |
| C(14)  | 0.781442                                        | -6.666447      | 3.492530       | 0.946505                                        | -6.775639      | 3.368276       | 1.131900                                        | -6.881351      | 3.304164       |
| H(14A) | 1.673768                                        | -6.907999      | 4.088461       | 1.838665                                        | -7.009061      | 3.967733       | 2.025488                                        | -7.098401      | 3.907688       |
| H(14B) | 0.710127                                        | -7.405064      | 2.682810       | 0.899764                                        | -7.498587      | 2.542702       | 1.110208                                        | -7.595484      | 2.469839       |
| H(14C) | -0.098413                                       | -6.794024      | 4.140011       | 0.064055                                        | -6.936991      | 4.004662       | 0.249506                                        | -7.073381      | 3.932111       |
| H(7A)  | 0.157510                                        | 0.332678       | 6.336753       | 0.163160                                        | 0.169364       | 6.348453       | 0.188650                                        | 0.034527       | 6.355063       |
| H(7B)  | -1.463673                                       | 0.116282       | 5.644118       | -1.454038                                       | -0.062349      | 5.654941       | -1.428060                                       | -0.225083      | 5.673634       |
| H(8A)  | -0.024575                                       | -2.125785      | 6.204343       | 0.004023                                        | -2.282066      | 6.173125       | 0.056830                                        | -2.412578      | 6.164785       |
| H(8B)  | -0.944031                                       | -2.000763      | 4.683973       | -0.898926                                       | -2.145843      | 4.644900       | -0.839222                                       | -2.282468      | 4.632736       |
| H(9A)  | 2.312575                                        | 0.186236       | 6.339731       | 2.288323                                        | 0.087743       | 6.343140       | 2.283407                                        | 0.009959       | 6.342347       |
| H(9B)  | 3.895153                                        | -0.211286      | 5.638090       | 3.885650                                        | -0.258303      | 5.650750       | 3.889500                                        | -0.284858      | 5.650011       |
| H(10A) | 2.212791                                        | -2.278587      | 6.183988       | 2.277122                                        | -2.370899      | 6.163741       | 2.364227                                        | -2.440617      | 6.150732       |
| H(10B) | 3.124984                                        | -2.240828      | 4.654273       | 3.179355                                        | -2.292251      | 4.630702       | 3.245582                                        | -2.327051      | 4.608653       |
| Br(1)  | -1.681841                                       | -0.000834      | -0.944474      | -1.681559                                       | -0.004046      | -0.944269      | -1.681403                                       | -0.006242      | -0.943905      |

**Table 29S.** Cartesian coordinates for azaester derivative (X = 3-Br, R = Bu) with B-N distance constrained to 2.1 Å (a), 2.2 Å (b) and 2.3 Å (c).

| <i>Atom</i> | $d_{\text{B-N}} = 2.1 \text{ \AA} \text{ (a)}$ |                |                | $d_{\text{B-N}} = 2.2 \text{ \AA} \text{ (b)}$ |                |                | $d_{\text{B-N}} = 2.3 \text{ \AA} \text{ (c)}$ |                |                |
|-------------|------------------------------------------------|----------------|----------------|------------------------------------------------|----------------|----------------|------------------------------------------------|----------------|----------------|
|             | <i>x / \AA</i>                                 | <i>y / \AA</i> | <i>z / \AA</i> | <i>x / \AA</i>                                 | <i>y / \AA</i> | <i>z / \AA</i> | <i>x / \AA</i>                                 | <i>y / \AA</i> | <i>z / \AA</i> |
| C(1)        | 1.212333                                       | 0.000000       | 2.111614       | 1.217585                                       | 0.000000       | 2.102388       | 1.217842                                       | 0.000000       | 2.101990       |
| C(2)        | 0.000000                                       | 0.000000       | 1.396417       | 0.000000                                       | 0.000000       | 1.393761       | 0.000000                                       | 0.000000       | 1.393592       |
| C(3)        | 0.000000                                       | 0.000000       | 0.000000       | 0.000000                                       | 0.000000       | 0.000000       | 0.000000                                       | 0.000000       | 0.000000       |
| C(4)        | 1.194462                                       | 0.006986       | -0.725285      | 1.185983                                       | 0.004190       | -0.735464      | 1.186302                                       | 0.001527       | -0.735062      |
| C(5)        | 2.403814                                       | 0.016307       | -0.021806      | 2.399193                                       | 0.008978       | -0.038373      | 2.399663                                       | 0.003865       | -0.038176      |
| C(6)        | 2.410673                                       | 0.010298       | 1.375043       | 2.412530                                       | 0.004974       | 1.359021       | 2.413208                                       | 0.002179       | 1.359044       |
| H(2)        | -0.943844                                      | 0.014637       | 1.937934       | -0.941280                                      | 0.012119       | 1.939390       | -0.941073                                      | 0.010716       | 1.939412       |
| H(3)        | 1.179518                                       | 0.011372       | -1.813636      | 1.164070                                       | 0.007000       | -1.823694      | 1.164550                                       | 0.003385       | -1.823319      |
| H(5)        | 3.342151                                       | 0.031111       | -0.577955      | 3.335182                                       | 0.019727       | -0.598733      | 3.335585                                       | 0.011007       | -0.598657      |
| H(6)        | 3.356691                                       | 0.023688       | 1.907845       | 3.364440                                       | 0.018033       | 1.888945       | 3.365144                                       | 0.012929       | 1.888874       |
| B(1)        | 1.213080                                       | -0.063224      | 3.696743       | 1.228255                                       | -0.032844      | 3.686312       | 1.227879                                       | -0.021427      | 3.683693       |
| O(1)        | -0.010270                                      | 0.283742       | 4.327483       | -0.003886                                      | 0.253396       | 4.303170       | -0.008079                                      | 0.212006       | 4.298019       |
| O(2)        | 2.470425                                       | 0.143363       | 4.307862       | 2.486491                                       | 0.177266       | 4.283961       | 2.481587                                       | 0.162058       | 4.280730       |
| N(1)        | 1.114680                                       | -2.046081      | 4.381281       | 1.169857                                       | -2.072853      | 4.507865       | 1.190227                                       | -2.125283      | 4.612335       |
| C(7)        | -0.461640                                      | -0.499222      | 5.409454       | -0.319996                                      | -0.401427      | 5.513069       | -0.314275                                      | -0.408295      | 5.530116       |
| C(8)        | -0.197846                                      | -1.972875      | 5.042634       | -0.047200                                      | -1.906616      | 5.315245       | -0.033508                                      | -1.918778      | 5.391431       |
| C(9)        | 2.671356                                       | -0.531982      | 5.528334       | 2.802371                                       | -0.519539      | 5.470325       | 2.789154                                       | -0.481667      | 5.500532       |
| C(10)       | 2.273321                                       | -2.010366      | 5.293423       | 2.431719                                       | -2.000076      | 5.256448       | 2.442815                                       | -1.977254      | 5.357600       |
| C(11)       | 1.202450                                       | -3.082152      | 3.331450       | 1.104416                                       | -3.168783      | 3.523413       | 1.149843                                       | -3.280802      | 3.701284       |
| H(11A)      | 0.407915                                       | -2.874843      | 2.603260       | 0.214500                                       | -2.993355      | 2.904112       | 0.262932                                       | -3.161202      | 3.063688       |
| H(11B)      | 2.152917                                       | -2.923067      | 2.805233       | 1.971598                                       | -3.058410      | 2.858391       | 2.022003                                       | -3.201490      | 3.037546       |
| C(12)       | 1.107572                                       | -4.531077      | 3.821256       | 1.066486                                       | -4.587395      | 4.105383       | 1.128577                                       | -4.661537      | 4.371156       |
| H(11A)      | 1.853652                                       | -4.708589      | 4.611336       | 1.968325                                       | -4.764826      | 4.711992       | 2.019368                                       | -4.777684      | 5.008480       |
| H(11B)      | 0.120925                                       | -4.704694      | 4.278726       | 0.206597                                       | -4.686086      | 4.786403       | 0.255231                                       | -4.735871      | 5.038089       |
| C(13)       | 1.321209                                       | -5.538565      | 2.685800       | 0.971301                                       | -5.657754      | 3.011420       | 1.084359                                       | -5.803251      | 3.348850       |
| H(13A)      | 0.592455                                       | -5.341795      | 1.883885       | 0.070916                                       | -5.474595      | 2.404366       | 0.195489                                       | -5.682944      | 2.709621       |
| H(13B)      | 2.315750                                       | -5.375679      | 2.241631       | 1.828209                                       | -5.554189      | 2.327137       | 1.955594                                       | -5.724110      | 2.679434       |
| C(14)       | 1.198138                                       | -6.994480      | 3.142556       | 0.931475                                       | -7.084237      | 3.566994       | 1.063004                                       | -7.190990      | 3.996076       |
| H(14A)      | 1.923730                                       | -7.224414      | 3.936714       | 1.834913                                       | -7.307361      | 4.153455       | 1.957492                                       | -7.354328      | 4.615085       |
| H(14B)      | 1.381504                                       | -7.688919      | 2.311402       | 0.866633                                       | -7.824562      | 2.757927       | 1.032792                                       | -7.984155      | 3.236469       |
| H(14C)      | 0.193284                                       | -7.204036      | 3.537542       | 0.061831                                       | -7.230157      | 4.224468       | 0.182074                                       | -7.313895      | 4.643167       |
| H(7A)       | 0.035685                                       | -0.220621      | 6.352044       | 0.251144                                       | 0.009196       | 6.358964       | 0.251480                                       | 0.038764       | 6.360057       |
| H(7B)       | -1.538346                                      | -0.326612      | 5.544579       | -1.384921                                      | -0.236446      | 5.727037       | -1.380551                                      | -0.244293      | 5.737255       |
| H(8A)       | -0.266404                                      | -2.630713      | 5.923009       | 0.015337                                       | -2.427398      | 6.284628       | 0.008651                                       | -2.395405      | 6.385898       |
| H(8B)       | -0.949749                                      | -2.295395      | 4.312704       | -0.881079                                      | -2.340783      | 4.751537       | -0.860852                                      | -2.375086      | 4.835033       |
| H(9A)       | 2.088676                                       | -0.077656      | 6.343969       | 2.285638                                       | -0.093376      | 6.343152       | 2.261516                                       | -0.019363      | 6.347061       |
| H(9B)       | 3.732664                                       | -0.458767      | 5.801137       | 3.881966                                       | -0.423158      | 5.650559       | 3.865821                                       | -0.363965      | 5.684696       |
| H(10A)      | 2.070436                                       | -2.530373      | 6.241867       | 2.386004                                       | -2.538887      | 6.217100       | 2.409934                                       | -2.461152      | 6.349024       |
| H(10B)      | 3.102957                                       | -2.524616      | 4.795646       | 3.208605                                       | -2.469169      | 4.641273       | 3.234048                                       | -2.461927      | 4.773206       |
| Br(1)       | -1.659795                                      | -0.001931      | -0.943582      | -1.680820                                      | -0.003839      | -0.943750      | -1.680405                                      | -0.001493      | -0.943929      |

**Table 30S.** Cartesian coordinates for azaester derivative ( $X = 3\text{-Br}$ ,  $R = \text{Bu}$ ) with B-N distance constrained to 2.4 Å (*a*), 2.5 Å (*b*) and 2.6 Å (*c*).

| Atom   | $d_{\text{B-N}} = 2.4 \text{ \AA}$ ( <i>a</i> ) |                  |                  | $d_{\text{B-N}} = 2.5 \text{ \AA}$ ( <i>b</i> ) |                  |                  | $d_{\text{B-N}} = 2.6 \text{ \AA}$ ( <i>c</i> ) |                  |                  |
|--------|-------------------------------------------------|------------------|------------------|-------------------------------------------------|------------------|------------------|-------------------------------------------------|------------------|------------------|
|        | $x / \text{\AA}$                                | $y / \text{\AA}$ | $z / \text{\AA}$ | $x / \text{\AA}$                                | $y / \text{\AA}$ | $z / \text{\AA}$ | $x / \text{\AA}$                                | $y / \text{\AA}$ | $z / \text{\AA}$ |
| C(1)   | 1.217922                                        | 0.000000         | 2.101801         | 1.218157                                        | 0.000000         | 2.101252         | 1.218368                                        | 0.000000         | 2.100859         |
| C(2)   | 0.000000                                        | 0.000000         | 1.393479         | 0.000000                                        | 0.000000         | 1.393397         | 0.000000                                        | 0.000000         | 1.393362         |
| C(3)   | 0.000000                                        | 0.000000         | 0.000000         | 0.000000                                        | 0.000000         | 0.000000         | 0.000000                                        | 0.000000         | 0.000000         |
| C(4)   | 1.186632                                        | 0.006497         | -0.734603        | 1.186740                                        | 0.000453         | -0.734469        | 1.186781                                        | 0.002935         | -0.734401        |
| C(5)   | 2.400002                                        | 0.012407         | -0.037729        | 2.400237                                        | 0.000904         | -0.037853        | 2.400342                                        | 0.005106         | -0.037975        |
| C(6)   | 2.413661                                        | 0.007829         | 1.359356         | 2.414073                                        | 0.000340         | 1.359130         | 2.414392                                        | 0.003063         | 1.358948         |
| H(2)   | -0.941143                                       | 0.004354         | 1.939190         | -0.941036                                       | 0.006314         | 1.939202         | -0.941099                                       | 0.002063         | 1.939067         |
| H(3)   | 1.165150                                        | 0.008518         | -1.822882        | 1.165260                                        | 0.001359         | -1.822755        | 1.165261                                        | 0.003886         | -1.822689        |
| H(5)   | 3.335890                                        | 0.022737         | -0.598171        | 3.336115                                        | 0.004553         | -0.598361        | 3.336187                                        | 0.009914         | -0.598498        |
| H(6)   | 3.365583                                        | 0.016872         | 1.889179         | 3.366060                                        | 0.005798         | 1.888812         | 3.366499                                        | 0.006854         | 1.888385         |
| B(1)   | 1.227451                                        | -0.035425        | 3.681779         | 1.227919                                        | -0.009897        | 3.680859         | 1.228621                                        | -0.018321        | 3.679731         |
| O(1)   | -0.011723                                       | 0.140005         | 4.294682         | -0.010989                                       | 0.146931         | 4.286454         | -0.009946                                       | 0.097319         | 4.284713         |
| O(2)   | 2.477906                                        | 0.116851         | 4.278584         | 2.477121                                        | 0.126435         | 4.270486         | 2.476364                                        | 0.088149         | 4.267703         |
| N(1)   | 1.213319                                        | -2.203279        | 4.711443         | 1.218282                                        | -2.180006        | 4.922042         | 1.230967                                        | -2.214307        | 5.071722         |
| C(7)   | -0.310086                                       | -0.451404        | 5.544624         | -0.301497                                       | -0.343323        | 5.582578         | -0.291704                                       | -0.329966        | 5.606346         |
| C(8)   | -0.018173                                       | -1.963750        | 5.460748         | -0.015100                                       | -1.856925        | 5.632047         | -0.004571                                       | -1.837661        | 5.745912         |
| C(9)   | 2.776615                                        | -0.478128        | 5.526733         | 2.766224                                        | -0.360516        | 5.568103         | 2.762750                                        | -0.331732        | 5.590593         |
| C(10)  | 2.456104                                        | -1.985048        | 5.448294         | 2.457415                                        | -1.869822        | 5.627747         | 2.468922                                        | -1.837649        | 5.741431         |
| C(11)  | 1.198616                                        | -3.404004        | 3.864233         | 1.210158                                        | -3.483077        | 4.243865         | 1.229734                                        | -3.563306        | 4.494916         |
| H(11A) | 0.315837                                        | -3.333179        | 3.213151         | 0.328472                                        | -3.504966        | 3.587312         | 0.348226                                        | -3.639547        | 3.841634         |
| H(11B) | 2.075551                                        | -3.347997        | 3.203775         | 2.089309                                        | -3.514227        | 3.584216         | 2.109173                                        | -3.639877        | 3.838787         |
| C(12)  | 1.191188                                        | -4.750654        | 4.602527         | 1.205304                                        | -4.721515        | 5.153306         | 1.231292                                        | -4.733821        | 5.490974         |
| H(11A) | 2.076715                                        | -4.819892        | 5.254004         | 2.089565                                        | -4.701736        | 5.809763         | 2.114099                                        | -4.661513        | 6.145785         |
| H(11B) | 0.311806                                        | -4.804901        | 5.263571         | 0.324630                                        | -4.691924        | 5.814099         | 0.349138                                        | -4.663281        | 6.146736         |
| C(13)  | 1.175980                                        | -5.942634        | 3.638566         | 1.196004                                        | -6.030094        | 4.354529         | 1.232169                                        | -6.095754        | 4.787144         |
| H(13A) | 0.292426                                        | -5.868687        | 2.984936         | 0.311798                                        | -6.046499        | 3.697735         | 0.348981                                        | -6.164906        | 4.132265         |
| H(13B) | 2.053171                                        | -5.882626        | 2.974886         | 2.072712                                        | -6.053441        | 3.687841         | 2.109856                                        | -6.159836        | 4.124303         |
| C(14)  | 1.169391                                        | -7.296966        | 4.353463         | 1.195998                                        | -7.278504        | 5.241616         | 1.239795                                        | -7.279234        | 5.759048         |
| H(14A) | 2.059458                                        | -7.414872        | 4.988953         | 2.088503                                        | -7.308647        | 5.883877         | 2.131382                                        | -7.258215        | 6.403018         |
| H(14B) | 1.160014                                        | -8.127224        | 3.633946         | 1.186763                                        | -8.196746        | 4.638355         | 1.238206                                        | -8.237414        | 5.221302         |
| H(14C) | 0.283470                                        | -7.401875        | 4.996912         | 0.312617                                        | -7.299382        | 5.896699         | 0.355565                                        | -7.261101        | 6.413139         |
| H(7A)  | 0.247163                                        | 0.028847         | 6.360722         | 0.255511                                        | 0.206070         | 6.352985         | 0.263243                                        | 0.264035         | 6.343592         |
| H(7B)  | -1.378494                                       | -0.291701        | 5.743491         | -1.369481                                       | -0.167622        | 5.769473         | -1.359945                                       | -0.148157        | 5.785660         |
| H(8A)  | 0.004376                                        | -2.397766        | 6.476699         | -0.011454                                       | -2.194346        | 6.685649         | -0.016031                                       | -2.105615        | 6.820556         |
| H(8B)  | -0.837551                                       | -2.442861        | 4.911359         | -0.833921                                       | -2.376908        | 5.119678         | -0.821196                                       | -2.386917        | 5.260818         |
| H(9A)  | 2.235759                                        | 0.013430         | 6.347030         | 2.220998                                        | 0.201796         | 6.337497         | 2.214301                                        | 0.270006         | 6.326302         |
| H(9B)  | 3.849581                                        | -0.337860        | 5.715842         | 3.837587                                        | -0.199824        | 5.749412         | 3.832754                                        | -0.153987        | 5.763673         |
| H(10A) | 2.435675                                        | -2.417146        | 6.465118         | 2.450847                                        | -2.200553        | 6.683436         | 2.480723                                        | -2.098222        | 6.817851         |
| H(10B) | 3.261191                                        | -2.479958        | 4.891724         | 3.267860                                        | -2.404861        | 5.117521         | 3.282696                                        | -2.393854        | 5.259418         |
| Br(1)  | -1.679973                                       | -0.006746        | -0.944079        | -1.679832                                       | -0.000963        | -0.944013        | -1.679700                                       | -0.003498        | -0.943876        |

**Table 31S.** Cartesian coordinates for azaester derivative (X = 3-Br, R = Bu) with B-N distance constrained to 2.7 Å (a), 2.8 Å (b) and 2.9 Å (c).

| Atom   | $d_{\text{B-N}} = 2.7 \text{ \AA}$ (a) |                   |                   | $d_{\text{B-N}} = 2.8 \text{ \AA}$ (b) |                   |                   | $d_{\text{B-N}} = 2.9 \text{ \AA}$ (c) |                   |                   |
|--------|----------------------------------------|-------------------|-------------------|----------------------------------------|-------------------|-------------------|----------------------------------------|-------------------|-------------------|
|        | $x / \text{ \AA}$                      | $y / \text{ \AA}$ | $z / \text{ \AA}$ | $x / \text{ \AA}$                      | $y / \text{ \AA}$ | $z / \text{ \AA}$ | $x / \text{ \AA}$                      | $y / \text{ \AA}$ | $z / \text{ \AA}$ |
| C(1)   | 1.217734                               | 0.000000          | 2.101525          | 1.218655                               | 0.000000          | 2.100180          | 2.415315                               | 0.005387          | 1.359079          |
| C(2)   | 0.000000                               | 0.000000          | 1.393296          | 0.000000                               | 0.000000          | 1.393334          | 1.218760                               | 0.000000          | 2.099877          |
| C(3)   | 0.000000                               | 0.000000          | 0.000000          | 0.000000                               | 0.000000          | 0.000000          | 0.000000                               | 0.000000          | 1.393326          |
| C(4)   | 1.187538                               | -0.002602         | -0.733283         | 1.186965                               | -0.004735         | -0.734132         | -1.679058                              | -0.006536         | -0.943765         |
| C(5)   | 2.400723                               | -0.006139         | -0.036061         | 2.400590                               | -0.009098         | -0.037956         | 1.187183                               | 0.006421          | -0.733840         |
| C(6)   | 2.414420                               | -0.006267         | 1.360886          | 2.414944                               | -0.006699         | 1.358898          | 2.400863                               | 0.010175          | -0.037738         |
| H(2)   | -0.941324                              | 0.007100          | 1.938524          | -0.941116                              | 0.005846          | 1.938965          | 3.367428                               | 0.004064          | 1.888502          |
| H(3)   | 1.167076                               | -0.001931         | -1.821595         | 1.165487                               | -0.004802         | -1.822415         | 1.228926                               | -0.026589         | 3.676525          |
| H(5)   | 3.336861                               | -0.007315         | -0.596098         | 3.336421                               | -0.012498         | -0.598464         | 1.165813                               | 0.007949          | -1.822127         |
| H(6)   | 3.366338                               | -0.007780         | 1.890712          | 3.367138                               | -0.007049         | 1.888157          | 3.336663                               | 0.015614          | -0.598253         |
| B(1)   | 1.223032                               | 0.000705          | 3.680163          | 1.229065                               | 0.013445          | 3.678114          | 2.470723                               | -0.011560         | 4.268887          |
| O(1)   | -0.009727                              | 0.170605          | 4.275604          | -0.005283                              | 0.112544          | 4.280077          | 1.209711                               | -2.197455         | 5.599276          |
| O(2)   | 2.469386                               | 0.020980          | 4.271661          | 2.474209                               | 0.073185          | 4.263700          | -0.003374                              | 0.026357          | 4.285601          |
| N(1)   | 1.096135                               | -2.158073         | 5.296818          | 1.206615                               | -2.103240         | 5.510909          | -0.022493                              | -1.624573         | 6.115376          |
| C(7)   | -0.310181                              | -0.131818         | 5.628638          | -0.274524                              | -0.096494         | 5.658818          | 2.459640                               | -1.655490         | 6.105484          |
| C(8)   | -0.116722                              | -1.634032         | 5.907318          | -0.021024                              | -1.558266         | 6.069754          | -0.270249                              | -0.171679         | 5.668420          |
| C(9)   | 2.726232                               | -0.304534         | 5.628463          | 2.752977                               | -0.143561         | 5.639308          | 1.190792                               | -3.655810         | 5.466682          |
| C(10)  | 2.353786                               | -1.771664         | 5.919707          | 2.455985                               | -1.595878         | 6.056375          | 2.744112                               | -0.211481         | 5.650184          |
| C(11)  | 1.016527                               | -3.566880         | 4.898216          | 1.183363                               | -3.555443         | 5.308653          | 0.304141                               | -3.920993         | 4.871412          |
| H(11A) | 0.142409                               | -3.672426         | 4.238542          | 0.294907                               | -3.789135         | 4.703389          | 2.066297                               | -3.943080         | 4.865065          |
| H(11B) | 1.899726                               | -3.784385         | 4.279943          | 2.056899                               | -3.815847         | 4.692560          | 1.185728                               | -4.467422         | 6.773601          |
| C(12)  | 0.921820                               | -4.596976         | 6.036025          | 1.178383                               | -4.424365         | 6.577746          | 2.072366                               | -4.208845         | 7.373763          |
| H(11A) | 1.796873                               | -4.500315         | 6.698144          | 2.070208                               | -4.198645         | 7.183423          | 0.307537                               | -4.191061         | 7.378207          |
| H(11B) | 0.036388                               | -4.382300         | 6.654900          | 0.305633                               | -4.167749         | 7.198585          | 1.169730                               | -5.979085         | 6.519962          |
| C(13)  | 0.837523                               | -6.035772         | 5.513825          | 1.149307                               | -5.923793         | 6.259905          | 0.284835                               | -6.235216         | 5.915653          |
| H(13A) | -0.027368                              | -6.124585         | 4.837158          | 0.255101                               | -6.148694         | 5.656959          | 2.045898                               | -6.252943         | 5.910659          |
| H(13B) | 1.727870                               | -6.251798         | 4.902006          | 2.015891                               | -6.177445         | 5.628608          | 1.165098                               | -6.809061         | 7.807110          |
| C(14)  | 0.719442                               | -7.078300         | 6.629489          | 1.154919                               | -6.806204         | 7.511790          | 2.056929                               | -6.600606         | 8.416399          |
| H(14A) | 1.585675                               | -7.036187         | 7.306243          | 2.057759                               | -6.631623         | 8.115395          | 1.153653                               | -7.885822         | 7.588363          |
| H(14B) | 0.664069                               | -8.096547         | 6.220317          | 1.128919                               | -7.872863         | 7.249286          | 0.281139                               | -6.582859         | 8.421503          |
| H(14C) | -0.184281                              | -6.910752         | 7.233710          | 0.282489                               | -6.596512         | 8.148067          | 0.290685                               | 0.545199          | 6.279018          |
| H(7A)  | 0.277031                               | 0.492682          | 6.313013          | 0.291074                               | 0.608459          | 6.279547          | -1.335085                              | 0.054024          | 5.815934          |
| H(7B)  | -1.365898                              | 0.126113          | 5.787642          | -1.338545                              | 0.129506          | 5.811128          | -0.090377                              | -1.643629         | 7.223939          |
| H(8A)  | -0.162192                              | -1.793975         | 7.003436          | -0.064742                              | -1.611414         | 7.177314          | -0.845192                              | -2.242122         | 5.731690          |
| H(8B)  | -0.962428                              | -2.173905         | 5.462670          | -0.847584                              | -2.167817         | 5.682292          | 2.533950                               | -1.671536         | 7.213707          |
| H(9A)  | 2.215071                               | 0.391478          | 6.304710          | 2.219238                               | 0.580783          | 6.265856          | 3.816092                               | -0.015049         | 5.787859          |
| H(9B)  | 3.804561                               | -0.173380         | 5.790958          | 3.825843                               | 0.046570          | 5.778440          | 3.825843                               | 0.046570          | 5.778440          |
| H(10A) | 2.365512                               | -1.923174         | 7.017966          | 2.508720                               | -1.647583         | 7.163630          | 3.263169                               | -2.296581         | 5.719726          |
| H(10B) | 3.136210                               | -2.412231         | 5.493450          | 3.258940                               | -2.232653         | 5.663044          | 2.208701                               | 0.523173          | 6.262460          |
| Br(1)  | -1.679028                              | 0.001454          | -0.944393         | -1.679356                              | 0.004252          | -0.943728         | -0.941105                              | -0.004820         | 1.939011          |

**Table 32S.** Cartesian coordinates for azaester derivative (X = 3-Br, R = Bu) with B-N distance constrained to 3.0 Å (*a*), 3.1 Å (*b*) and 3.2 Å (*c*).

| <i>Atom</i> | <i>d</i> <sub>B-N</sub> = 3.0 Å ( <i>a</i> ) |              |              | <i>d</i> <sub>B-N</sub> = 3.1 Å ( <i>b</i> ) |              |              | <i>d</i> <sub>B-N</sub> = 3.2 Å ( <i>c</i> ) |              |              |
|-------------|----------------------------------------------|--------------|--------------|----------------------------------------------|--------------|--------------|----------------------------------------------|--------------|--------------|
|             | <i>x</i> / Å                                 | <i>y</i> / Å | <i>z</i> / Å | <i>x</i> / Å                                 | <i>y</i> / Å | <i>z</i> / Å | <i>x</i> / Å                                 | <i>y</i> / Å | <i>z</i> / Å |
| C(1)        | 1.217889                                     | 0.000000     | 2.100921     | 1.219241                                     | 0.000000     | 2.099013     | 1.219330                                     | 0.000000     | 2.098786     |
| C(2)        | 0.000000                                     | 0.000000     | 1.393214     | 0.000000                                     | 0.000000     | 1.393331     | 0.000000                                     | 0.000000     | 1.393295     |
| C(3)        | 0.000000                                     | 0.000000     | 0.000000     | 0.000000                                     | 0.000000     | 0.000000     | 0.000000                                     | 0.000000     | 0.000000     |
| C(4)        | 1.188337                                     | -0.003498    | -0.732290    | 1.187406                                     | -0.003532    | -0.733629    | 1.187755                                     | 0.002481     | -0.733188    |
| C(5)        | 2.401494                                     | -0.008382    | -0.035060    | 2.401310                                     | -0.006794    | -0.037997    | 2.401691                                     | 0.003627     | -0.037556    |
| C(6)        | 2.415332                                     | -0.008497    | 1.361881     | 2.416097                                     | -0.004434    | 1.358756     | 2.416543                                     | 0.002251     | 1.359182     |
| H(2)        | -0.941423                                    | 0.005699     | 1.938370     | -0.941015                                    | 0.002367     | 1.939299     | -0.940969                                    | -0.003018    | 1.939392     |
| H(3)        | 1.168446                                     | -0.002849    | -1.820613    | 1.165924                                     | -0.003689    | -1.821909    | 1.166495                                     | 0.003168     | -1.821474    |
| H(5)        | 3.337675                                     | -0.011706    | -0.594959    | 3.336979                                     | -0.009894    | -0.598696    | 3.337342                                     | 0.005390     | -0.598263    |
| H(6)        | 3.367179                                     | -0.014015    | 1.891926     | 3.368222                                     | -0.005533    | 1.888222     | 3.368524                                     | 0.001167     | 1.888942     |
| B(1)        | 1.221363                                     | 0.006447     | 3.676889     | 1.230335                                     | 0.014930     | 3.673755     | 1.229125                                     | -0.007142    | 3.672073     |
| O(1)        | -0.005636                                    | 0.150637     | 4.279398     | 0.003406                                     | 0.041958     | 4.292282     | 0.005196                                     | -0.011786    | 4.298259     |
| O(2)        | 2.453464                                     | -0.074018    | 4.281761     | 2.466718                                     | 0.029409     | 4.274519     | 2.461818                                     | -0.018791    | 4.281892     |
| N(1)        | 1.027428                                     | -2.043951    | 5.858232     | 1.236370                                     | -1.963469    | 6.060364     | 1.243658                                     | -1.988474    | 6.184862     |
| C(7)        | -0.283221                                    | 0.101987     | 5.674539     | -0.252881                                    | 0.053556     | 5.694428     | -0.246117                                    | 0.025369     | 5.702934     |
| C(8)        | -0.153962                                    | -1.309250    | 6.277115     | -0.006468                                    | -1.292623    | 6.401270     | -0.003877                                    | -1.296260    | 6.459771     |
| C(9)        | 2.709114                                     | -0.172973    | 5.679197     | 2.737890                                     | 0.041582     | 5.673857     | 2.733512                                     | 0.017442     | 5.682788     |
| C(10)       | 2.321860                                     | -1.537645    | 6.281011     | 2.487721                                     | -1.301046    | 6.386190     | 2.498414                                     | -1.303722    | 6.443175     |
| C(11)       | 0.892309                                     | -3.499477    | 5.940123     | 1.234152                                     | -3.404839    | 6.307977     | 1.240388                                     | -3.404403    | 6.546100     |
| H(11A)      | -0.014497                                    | -3.778635    | 5.382593     | 0.344066                                     | -3.823122    | 5.813836     | 0.357878                                     | -3.864456    | 6.075543     |
| H(11B)      | 1.740730                                     | -3.940829    | 5.395756     | 2.107112                                     | -3.830380    | 5.789785     | 2.121620                                     | -3.868156    | 6.076877     |
| C(12)       | 0.824238                                     | -4.106862    | 7.352295     | 1.252188                                     | -3.855125    | 7.779775     | 1.238955                                     | -3.733754    | 8.050063     |
| H(11A)      | 1.730905                                     | -3.837000    | 7.916446     | 2.143837                                     | -3.448132    | 8.282171     | 2.124750                                     | -3.287592    | 8.529081     |
| H(11B)      | -0.026289                                    | -3.672817    | 7.901147     | 0.378789                                     | -3.439381    | 8.306482     | 0.359788                                     | -3.275323    | 8.529506     |
| C(13)       | 0.681636                                     | -5.632944    | 7.324887     | 1.246764                                     | -5.381613    | 7.919124     | 1.228158                                     | -5.243524    | 8.315915     |
| H(13A)      | -0.221871                                    | -5.902024    | 6.754557     | 0.355410                                     | -5.787822    | 7.414687     | 0.345277                                     | -5.690375    | 7.831256     |
| H(13B)      | 1.531594                                     | -6.066130    | 6.773615     | 2.116181                                     | -5.796756    | 7.384469     | 2.106481                                     | -5.702364    | 7.834066     |
| C(14)       | 0.607677                                     | -6.258781    | 8.720695     | 1.269415                                     | -5.857382    | 9.374773     | 1.223670                                     | -5.595304    | 9.806389     |
| H(14A)      | 1.512906                                     | -6.034794    | 9.304189     | 2.169273                                     | -5.497768    | 9.895394     | 2.113896                                     | -5.192236    | 10.311457    |
| H(14B)      | 0.508286                                     | -7.351650    | 8.664075     | 1.262893                                     | -6.954449    | 9.437240     | 1.215556                                     | -6.683272    | 9.960484     |
| H(14C)      | -0.255376                                    | -5.872897    | 9.283033     | 0.393826                                     | -5.485503    | 9.927191     | 0.338107                                     | -5.179375    | 10.309199    |
| H(7A)       | 0.327701                                     | 0.833682     | 6.215017     | 0.296176                                     | 0.869682     | 6.176723     | 0.297162                                     | 0.857372     | 6.163656     |
| H(7B)       | -1.328085                                    | 0.420065     | 5.792135     | -1.320173                                    | 0.288409     | 5.806639     | -1.314552                                    | 0.257577     | 5.810304     |
| H(8A)       | -0.236889                                    | -1.192875    | 7.379376     | -0.119192                                    | -1.091468    | 7.489520     | -0.146069                                    | -1.047071    | 7.535287     |
| H(8B)       | -1.022316                                    | -1.897129    | 5.951094     | -0.817923                                    | -1.977098    | 6.119308     | -0.809505                                    | -1.992965    | 6.189912     |
| H(9A)       | 2.238043                                     | 0.657506     | 6.216936     | 2.201088                                     | 0.863442     | 6.160146     | 2.197999                                     | 0.849761     | 6.151844     |
| H(9B)       | 3.793740                                     | -0.050353    | 5.803203     | 3.808346                                     | 0.267442     | 5.774515     | 3.803788                                     | 0.247854     | 5.775195     |
| H(10A)      | 2.422040                                     | -1.439156    | 7.383940     | 2.613742                                     | -1.098486    | 7.472710     | 2.657014                                     | -1.055264    | 7.516704     |
| H(10B)      | 3.069132                                     | -2.274417    | 5.957360     | 3.290898                                     | -1.992555    | 6.097479     | 3.296963                                     | -2.004031    | 6.161722     |
| Br(1)       | -1.678041                                    | 0.002797     | -0.944725    | -1.678668                                    | 0.003896     | -0.943669    | -1.678289                                    | -0.001579    | -0.943887    |

**Table 33S.** Cartesian coordinates for azaester derivative (X = 3-Br, R = Bu) with B-N distance constrained to 3.3 Å.

| <i>Atom</i> | $d_{\text{B-N}} = 3.3 \text{ \AA} (a)$ |                |                |
|-------------|----------------------------------------|----------------|----------------|
|             | $x / \text{Å}$                         | $y / \text{Å}$ | $z / \text{Å}$ |
| C(1)        | 1.219774                               | 0.000000       | 2.098074       |
| C(2)        | 0.000000                               | 0.000000       | 1.393350       |
| C(3)        | 0.000000                               | 0.000000       | 0.000000       |
| C(4)        | 1.187714                               | 0.000656       | -0.733248      |
| C(5)        | 2.401909                               | 0.001082       | -0.038052      |
| C(6)        | 2.417100                               | 0.001722       | 1.358593       |
| H(2)        | -0.940820                              | -0.002824      | 1.939764       |
| H(3)        | 1.166216                               | 0.000802       | -1.821523      |
| H(5)        | 3.337379                               | 0.001285       | -0.599030      |
| H(6)        | 3.369036                               | 0.002145       | 1.888419       |
| B(1)        | 1.230536                               | 0.001129       | 3.669913       |
| O(1)        | 0.013540                               | -0.053858      | 4.308174       |
| O(2)        | 2.461680                               | 0.021482       | 4.284593       |
| N(1)        | 1.318754                               | -1.889236      | 6.373382       |
| C(7)        | -0.233346                              | 0.048658       | 5.712265       |
| C(8)        | 0.048670                               | -1.207915      | 6.563961       |
| C(9)        | 2.736454                               | 0.130202       | 5.682965       |
| C(10)       | 2.560341                               | -1.148694      | 6.525695       |
| C(11)       | 1.357706                               | -3.245201      | 6.915891       |
| H(11A)      | 0.493010                               | -3.791730      | 6.508470       |
| H(11B)      | 2.256724                               | -3.736915      | 6.513250       |
| C(12)       | 1.358362                               | -3.375121      | 8.450267       |
| H(11A)      | 2.214844                               | -2.824199      | 8.869325       |
| H(11B)      | 0.452026                               | -2.904790      | 8.862444       |
| C(13)       | 1.423438                               | -4.835781      | 8.909824       |
| H(13A)      | 0.573250                               | -5.389203      | 8.479628       |
| H(13B)      | 2.332302                               | -5.303896      | 8.498773       |
| C(14)       | 1.414779                               | -4.992760      | 10.433306      |
| H(14A)      | 2.272166                               | -4.476491      | 10.889901      |
| H(14B)      | 1.466533                               | -6.050503      | 10.726660      |
| H(14C)      | 0.498900                               | -4.568766      | 10.870856      |
| H(7A)       | 0.276483                               | 0.927668       | 6.120545       |
| H(7B)       | -1.309710                              | 0.246694       | 5.809258       |
| H(8A)       | -0.123843                              | -0.877469      | 7.613345       |
| H(8B)       | -0.731732                              | -1.948684      | 6.339415       |
| H(9A)       | 2.178570                               | 0.968155       | 6.113879       |
| H(9B)       | 3.799173                               | 0.399173       | 5.755355       |
| H(10A)      | 2.755980                               | -0.821773      | 7.572291       |
| H(10B)      | 3.368865                               | -1.844475      | 6.260051       |
| Br(1)       | -1.678190                              | 0.000462       | -0.943706      |

**Table 34S.** Cartesian coordinates for azaester derivative (X = 2-Br, R = Bu) with B-N distance constrained to 1.5 Å (a), 1.6 Å (b) and 1.7 Å (c).

| Atom   | $d_{\text{B-N}} = 1.5 \text{ \AA}$ (a) |                |                | $d_{\text{B-N}} = 1.6 \text{ \AA}$ (b) |                |                | $d_{\text{B-N}} = 1.7 \text{ \AA}$ (c) |                |                |
|--------|----------------------------------------|----------------|----------------|----------------------------------------|----------------|----------------|----------------------------------------|----------------|----------------|
|        | $x / \text{Å}$                         | $y / \text{Å}$ | $z / \text{Å}$ | $x / \text{Å}$                         | $y / \text{Å}$ | $z / \text{Å}$ | $x / \text{Å}$                         | $y / \text{Å}$ | $z / \text{Å}$ |
| C(1)   | 2.188148                               | 1.161788       | 0.000000       | 2.184327                               | 1.163836       | 0.000000       | 2.181435                               | 1.166158       | 0.000000       |
| C(2)   | 1.399634                               | 0.000000       | 0.000000       | 1.398673                               | 0.000000       | 0.000000       | 1.398536                               | 0.000000       | 0.000000       |
| C(3)   | 0.000000                               | 0.000000       | 0.000000       | 0.000000                               | 0.000000       | 0.000000       | 0.000000                               | 0.000000       | 0.000000       |
| C(4)   | -0.684403                              | 1.215471       | 0.006651       | -0.683020                              | 1.217076       | 0.001948       | -0.683490                              | 1.217010       | 0.003263       |
| C(5)   | 0.045602                               | 2.406581       | 0.010337       | 0.045600                               | 2.408522       | 0.000495       | 0.043338                               | 2.409617       | 0.001059       |
| C(6)   | 1.440621                               | 2.364409       | 0.010820       | 1.440919                               | 2.367679       | -0.001357      | 1.438612                               | 2.370084       | -0.001884      |
| H(2)   | -0.545108                              | -0.941923      | -0.001211      | -0.546303                              | -0.941215      | 0.002051       | -0.546147                              | -0.941295      | 0.000473       |
| H(3)   | -1.774928                              | 1.223529       | 0.013574       | -1.773612                              | 1.225511       | 0.007614       | -1.774097                              | 1.224547       | 0.009278       |
| H(5)   | -0.470230                              | 3.367547       | 0.025298       | -0.471664                              | 3.368738       | 0.008788       | -0.475295                              | 3.369050       | 0.008855       |
| H(6)   | 1.996319                               | 3.299749       | 0.046481       | 2.000718                               | 3.300906       | 0.015588       | 1.998561                               | 3.303400       | 0.012405       |
| B(1)   | 3.834869                               | 1.292561       | 0.094668       | 3.813796                               | 1.282546       | 0.066721       | 3.802350                               | 1.283290       | 0.063763       |
| O(1)   | 4.129217                               | 2.656030       | 0.573680       | 4.161206                               | 2.686590       | 0.322848       | 4.180940                               | 2.676256       | 0.269122       |
| O(2)   | 4.436937                               | 0.265641       | 0.981548       | 4.417553                               | 0.347148       | 1.025824       | 4.432888                               | 0.332847       | 0.970147       |
| N(1)   | 4.648239                               | 1.169495       | -1.159638      | 4.628554                               | 0.970897       | -1.274563      | 4.637011                               | 0.947321       | -1.378619      |
| C(7)   | 5.410939                               | -0.516904      | 0.344762       | 5.510991                               | -0.363666      | 0.506460       | 5.546655                               | -0.337792      | 0.439048       |
| C(8)   | 5.191774                               | -0.236812      | -1.148640      | 5.325788                               | -0.340499      | -1.012243      | 5.357786                               | -0.334450      | -1.081446      |
| C(9)   | 5.510956                               | 2.837457       | 0.403850       | 5.508101                               | 2.857892       | -0.034788      | 5.511249                               | 2.848918       | -0.148702      |
| C(10)  | 5.777046                               | 2.194316       | -0.967521      | 5.622975                               | 2.119673       | -1.374448      | 5.580784                               | 2.121724       | -1.499844      |
| C(11)  | 3.890497                               | 1.449697       | -2.445362      | 3.779695                               | 0.895041       | -2.515761      | 3.759792                               | 0.824958       | -2.588141      |
| H(11A) | 3.034895                               | 0.768668       | -2.448312      | 3.029544                               | 0.119402       | -2.334573      | 3.035567                               | 0.032838       | -2.373215      |
| H(11B) | 3.495274                               | 2.466623       | -2.345110      | 3.249258                               | 1.851828       | -2.584564      | 3.200329                               | 1.764959       | -2.662193      |
| C(12)  | 4.693228                               | 1.293601       | -3.735154      | 4.539855                               | 0.599719       | -3.808323      | 4.493238                               | 0.526984       | -3.896277      |
| H(11A) | 5.617131                               | 1.888788       | -3.702916      | 5.324437                               | 1.351753       | -3.978086      | 5.246513                               | 1.302408       | -4.100839      |
| H(11B) | 4.997856                               | 0.245285       | -3.864200      | 5.045392                               | -0.374023      | -3.734030      | 5.035434                               | -0.426511      | -3.814169      |
| C(13)  | 3.859238                               | 1.725290       | -4.950170      | 3.592270                               | 0.581704       | -5.015997      | 3.517823                               | 0.450210       | -5.078805      |
| H(13A) | 2.901622                               | 1.182530       | -4.945392      | 2.806305                               | -0.170493      | -4.848388      | 2.761569                               | -0.323320      | -4.875081      |
| H(13B) | 3.608487                               | 2.793038       | -4.855429      | 3.078774                               | 1.552939       | -5.088683      | 2.970502                               | 1.402224       | -5.159440      |
| C(14)  | 4.579621                               | 1.483540       | -6.279340      | 4.314374                               | 0.284415       | -6.333034      | 4.216229                               | 0.146980       | -6.407249      |
| H(14A) | 5.534268                               | 2.028229       | -6.319351      | 5.082777                               | 1.042214       | -6.544978      | 4.954070                               | 0.924107       | -6.654980      |
| H(14B) | 3.967483                               | 1.819178       | -7.126952      | 3.611083                               | 0.276396       | -7.176534      | 3.493136                               | 0.097312       | -7.232452      |
| H(14C) | 4.796398                               | 0.415376       | -6.424667      | 4.810484                               | -0.696603      | -6.301577      | 4.744969                               | -0.816553      | -6.367050      |
| H(7A)  | 6.432844                               | -0.238780      | 0.668101       | 6.473881                               | 0.093943       | 0.802839       | 6.494323                               | 0.152859       | 0.729089       |
| H(7B)  | 5.270600                               | -1.587429      | 0.561815       | 5.507181                               | -1.399652      | 0.878527       | 5.579564                               | -1.370696      | 0.817372       |
| H(8A)  | 6.080372                               | -0.276660      | -1.784562      | 6.253128                               | -0.412554      | -1.589969      | 6.292367                               | -0.404200      | -1.649528      |
| H(8B)  | 4.414168                               | -0.889164      | -1.553040      | 4.641186                               | -1.135320      | -1.317346      | 4.693684                               | -1.152209      | -1.372188      |
| H(9A)  | 6.090593                               | 2.340497       | 1.200159       | 6.191715                               | 2.436156       | 0.721743       | 6.227985                               | 2.428526       | 0.576821       |
| H(9B)  | 5.764682                               | 3.906806       | 0.402276       | 5.740402                               | 3.926182       | -0.148144      | 5.734020                               | 3.918895       | -0.264525      |
| H(10A) | 6.738076                               | 1.682105       | -1.069079      | 6.622736                               | 1.740273       | -1.609999      | 6.584344                               | 1.785503       | -1.783436      |
| H(10B) | 5.675202                               | 2.926835       | -1.771353      | 5.291484                               | 2.774271       | -2.185298      | 5.194328                               | 2.778695       | -2.284862      |
| Br(1)  | 2.170338                               | -1.791486      | -0.047105      | 2.182360                               | -1.785607      | -0.018694      | 2.184990                               | -1.782944      | -0.029113      |



**Table 35S.** Cartesian coordinates for azaester derivative (X = 2-Br, R = Bu) with B-N distance constrained to 1.8 Å (a), 1.9 Å (b) and 2.0 Å (c).

| Atom   | $d_{\text{B-N}} = 1.8 \text{ \AA} \text{ (a)}$ |                  |                  | $d_{\text{B-N}} = 1.9 \text{ \AA} \text{ (b)}$ |                  |                  | $d_{\text{B-N}} = 2.0 \text{ \AA} \text{ (c)}$ |                  |                  |
|--------|------------------------------------------------|------------------|------------------|------------------------------------------------|------------------|------------------|------------------------------------------------|------------------|------------------|
|        | $x / \text{\AA}$                               | $y / \text{\AA}$ | $z / \text{\AA}$ | $x / \text{\AA}$                               | $y / \text{\AA}$ | $z / \text{\AA}$ | $x / \text{\AA}$                               | $y / \text{\AA}$ | $z / \text{\AA}$ |
| C(1)   | 2.178726                                       | 1.168466         | 0.000000         | 2.176774                                       | 1.170148         | 0.000000         | 2.174351                                       | 1.172389         | 0.000000         |
| C(2)   | 1.398442                                       | 0.000000         | 0.000000         | 1.398426                                       | 0.000000         | 0.000000         | 1.398443                                       | 0.000000         | 0.000000         |
| C(3)   | 0.000000                                       | 0.000000         | 0.000000         | 0.000000                                       | 0.000000         | 0.000000         | 0.000000                                       | 0.000000         | 0.000000         |
| C(4)   | -0.684257                                      | 1.216708         | 0.002483         | -0.684484                                      | 1.216706         | 0.005350         | -0.685329                                      | 1.216251         | 0.007867         |
| C(5)   | 0.040739                                       | 2.410462         | -0.001500        | 0.039265                                       | 2.411380         | 0.003359         | 0.036662                                       | 2.412097         | 0.007090         |
| C(6)   | 1.435921                                       | 2.372316         | -0.005056        | 1.434336                                       | 2.374240         | -0.003021        | 1.431529                                       | 2.376356         | -0.001523        |
| H(2)   | -0.545849                                      | -0.941460        | 0.000617         | -0.545688                                      | -0.941505        | -0.001041        | -0.545233                                      | -0.941746        | -0.002643        |
| H(3)   | -1.774881                                      | 1.223133         | 0.008403         | -1.775123                                      | 1.222639         | 0.011544         | -1.775981                                      | 1.221109         | 0.014367         |
| H(5)   | -0.479199                                      | 3.369156         | 0.004390         | -0.481645                                      | 3.369488         | 0.011281         | -0.485490                                      | 3.369472         | 0.016366         |
| H(6)   | 1.995579                                       | 3.305929         | 0.004664         | 1.993791                                       | 3.308103         | 0.003792         | 1.990186                                       | 3.310763         | 0.002658         |
| B(1)   | 3.792225                                       | 1.285857         | 0.056860         | 3.784083                                       | 1.285829         | 0.036218         | 3.775799                                       | 1.288611         | 0.022596         |
| O(1)   | 4.196716                                       | 2.669023         | 0.190682         | 4.213643                                       | 2.654794         | 0.103799         | 4.221615                                       | 2.643578         | 0.031293         |
| O(2)   | 4.446322                                       | 0.330335         | 0.920252         | 4.467112                                       | 0.314925         | 0.837887         | 4.481207                                       | 0.301258         | 0.761870         |
| N(1)   | 4.644753                                       | 0.906144         | -1.482300        | 4.635652                                       | 0.873318         | -1.611406        | 4.640054                                       | 0.852909         | -1.727611        |
| C(7)   | 5.585626                                       | -0.297872        | 0.389165         | 5.616363                                       | -0.278142        | 0.284584         | 5.644198                                       | -0.253628        | 0.193970         |
| C(8)   | 5.396796                                       | -0.335432        | -1.133085        | 5.406755                                       | -0.340136        | -1.236181        | 5.427172                                       | -0.333777        | -1.326905        |
| C(9)   | 5.506074                                       | 2.843545         | -0.290424        | 5.500336                                       | 2.827846         | -0.437795        | 5.490623                                       | 2.820645         | -0.552508        |
| C(10)  | 5.532232                                       | 2.106755         | -1.640037        | 5.482305                                       | 2.089298         | -1.789035        | 5.446922                                       | 2.085625         | -1.906892        |
| C(11)  | 3.746405                                       | 0.715142         | -2.660152        | 3.712195                                       | 0.645060         | -2.756052        | 3.706192                                       | 0.594427         | -2.850858        |
| H(11A) | 3.056432                                       | -0.095699        | -2.403918        | 3.045613                                       | -0.175478        | -2.468173        | 3.059446                                       | -0.235852        | -2.543884        |
| H(11B) | 3.150174                                       | 1.631170         | -2.751015        | 3.092993                                       | 1.546280         | -2.846924        | 3.066066                                       | 1.481427         | -2.942527        |
| C(12)  | 4.457556                                       | 0.403778         | -3.978441        | 4.391201                                       | 0.326828         | -4.090666        | 4.367484                                       | 0.275777         | -4.195368        |
| H(11A) | 5.170921                                       | 1.204049         | -4.226673        | 5.077541                                       | 1.140207         | -4.371441        | 5.033224                                       | 1.100333         | -4.493621        |
| H(11B) | 5.043590                                       | -0.522020        | -3.878495        | 5.003436                                       | -0.582212        | -3.990916        | 5.000151                                       | -0.619537        | -4.096251        |
| C(13)  | 3.458374                                       | 0.244307         | -5.132382        | 3.365081                                       | 0.122345         | -5.213078        | 3.328910                                       | 0.040178         | -5.299629        |
| H(13A) | 2.743721                                       | -0.555268        | -4.883945        | 2.676726                                       | -0.688804        | -4.929996        | 2.662528                                       | -0.783196        | -4.999318        |
| H(13B) | 2.866170                                       | 1.167638         | -5.228754        | 2.748485                                       | 1.029675         | -5.309304        | 2.691249                                       | 0.933231         | -5.392969        |
| C(14)  | 4.136175                                       | -0.071202        | -6.468643        | 4.011949                                       | -0.202309        | -6.562455        | 3.960370                                       | -0.281544        | -6.657038        |
| H(14A) | 4.832650                                       | 0.728750         | -6.759783        | 4.680111                                       | 0.608343         | -6.888351        | 4.604306                                       | 0.541244         | -7.000870        |
| H(14B) | 3.396028                                       | -0.179245        | -7.272987        | 3.252262                                       | -0.343603        | -7.343182        | 3.191448                                       | -0.447133        | -7.423926        |
| H(14C) | 4.708128                                       | -1.008924        | -6.411994        | 4.608292                                       | -1.124705        | -6.505018        | 4.578810                                       | -1.189451        | -6.601782        |
| H(7A)  | 6.512160                                       | 0.235818         | 0.667871         | 6.529541                                       | 0.285952         | 0.543231         | 6.540129                                       | 0.340140         | 0.442689         |
| H(7B)  | 5.661627                                       | -1.320637        | 0.787362         | 5.730345                                       | -1.293456        | 0.691708         | 5.793250                                       | -1.261891        | 0.606281         |
| H(8A)  | 6.340721                                       | -0.402562        | -1.687964        | 6.351332                                       | -0.409971        | -1.792096        | 6.377484                                       | -0.402685        | -1.875875        |
| H(8B)  | 4.760775                                       | -1.183553        | -1.399954        | 4.785141                                       | -1.206548        | -1.478701        | 4.823101                                       | -1.216943        | -1.554937        |
| H(9A)  | 6.257942                                       | 2.440795         | 0.408430         | 6.282666                                       | 2.433855         | 0.230937         | 6.294486                                       | 2.435137         | 0.094093         |
| H(9B)  | 5.712073                                       | 3.914587         | -0.425369        | 5.693920                                       | 3.899667         | -0.583753        | 5.670315                                       | 3.894201         | -0.702689        |
| H(10A) | 6.537333                                       | 1.814429         | -1.967327        | 6.485057                                       | 1.829424         | -2.152719        | 6.450469                                       | 1.861612         | -2.295172        |
| H(10B) | 5.087956                                       | 2.749955         | -2.406422        | 4.996678                                       | 2.727031         | -2.535193        | 4.929446                                       | 2.719829         | -2.634955        |
| Br(1)  | 2.187175                                       | -1.780579        | -0.027087        | 2.187595                                       | -1.778814        | -0.026328        | 2.188342                                       | -1.776609        | -0.028545        |

**Table 36S.** Cartesian coordinates for azaester derivative (X = 2-Br, R = Bu) with B-N distance constrained to 2.1 Å (a), 2.2 Å (b) and 2.3 Å (c).

| Atom   | $d_{\text{B-N}} = 2.1 \text{ \AA} \text{ (a)}$ |                |                | $d_{\text{B-N}} = 2.2 \text{ \AA} \text{ (b)}$ |                |                | $d_{\text{B-N}} = 2.3 \text{ \AA} \text{ (c)}$ |                |                |
|--------|------------------------------------------------|----------------|----------------|------------------------------------------------|----------------|----------------|------------------------------------------------|----------------|----------------|
|        | $x / \text{Å}$                                 | $y / \text{Å}$ | $z / \text{Å}$ | $x / \text{Å}$                                 | $y / \text{Å}$ | $z / \text{Å}$ | $x / \text{Å}$                                 | $y / \text{Å}$ | $z / \text{Å}$ |
| C(1)   | 2.171467                                       | 1.174733       | 0.000000       | 2.169073                                       | 1.176540       | 0.000000       | 2.164578                                       | 1.179540       | 0.000000       |
| C(2)   | 1.398414                                       | 0.000000       | 0.000000       | 1.398418                                       | 0.000000       | 0.000000       | 1.398218                                       | 0.000000       | 0.000000       |
| C(3)   | 0.000000                                       | 0.000000       | 0.000000       | 0.000000                                       | 0.000000       | 0.000000       | 0.000000                                       | 0.000000       | 0.000000       |
| C(4)   | -0.686795                                      | 1.215379       | 0.001443       | -0.687611                                      | 1.214906       | 0.004804       | -0.688510                                      | 1.214519       | 0.007083       |
| C(5)   | 0.033082                                       | 2.412450       | -0.005267      | 0.030703                                       | 2.413016       | -0.000620      | 0.027256                                       | 2.414205       | -0.001273      |
| C(6)   | 1.427734                                       | 2.378322       | -0.011187      | 1.425172                                       | 2.380094       | -0.009540      | 1.421574                                       | 2.383223       | -0.011943      |
| H(2)   | -0.544598                                      | -0.942145      | 0.000194       | -0.544238                                      | -0.942354      | -0.002395      | -0.543916                                      | -0.942557      | -0.006880      |
| H(3)   | -1.777460                                      | 1.218580       | 0.006893       | -1.778280                                      | 1.217060       | 0.010706       | -1.779180                                      | 1.215284       | 0.013777       |
| H(5)   | -0.490407                                      | 3.369095       | -0.002726      | -0.493833                                      | 3.369049       | 0.003300       | -0.499069                                      | 3.369209       | 0.000040       |
| H(6)   | 1.985014                                       | 3.313519       | -0.012951      | 1.981586                                       | 3.315816       | -0.015323      | 1.976576                                       | 3.319989       | -0.023334      |
| B(1)   | 3.767631                                       | 1.294451       | 0.035227       | 3.761293                                       | 1.296374       | 0.023959       | 3.750527                                       | 1.298257       | 0.043712       |
| O(1)   | 4.220402                                       | 2.635231       | -0.050069      | 4.222047                                       | 2.617915       | -0.143473      | 4.227348                                       | 2.570877       | -0.272539      |
| O(2)   | 4.470002                                       | 0.318485       | 0.772530       | 4.470532                                       | 0.319950       | 0.735461       | 4.441162                                       | 0.331101       | 0.757054       |
| N(1)   | 4.716954                                       | 0.774453       | -1.764325      | 4.771719                                       | 0.711291       | -1.840636      | 5.021154                                       | 0.566028       | -1.856116      |
| C(7)   | 5.679869                                       | -0.192941      | 0.260639       | 5.708196                                       | -0.155588      | 0.251846       | 5.746142                                       | -0.089870      | 0.411181       |
| C(8)   | 5.518218                                       | -0.355967      | -1.261722      | 5.581320                                       | -0.372877      | -1.267999      | 5.792711                                       | -0.415063      | -1.094911      |
| C(9)   | 5.487885                                       | 2.811565       | -0.639812      | 5.485525                                       | 2.792210       | -0.745493      | 5.530502                                       | 2.737266       | -0.794497      |
| C(10)  | 5.476092                                       | 2.025290       | -1.966800      | 5.490248                                       | 1.976890       | -2.055514      | 5.669614                                       | 1.861701       | -2.056828      |
| C(11)  | 3.828102                                       | 0.428317       | -2.895399      | 3.920343                                       | 0.301830       | -2.974970      | 4.357750                                       | 0.025264       | -3.053583      |
| H(11A) | 3.198980                                       | -0.407316      | -2.565686      | 3.305152                                       | -0.539045      | -2.630824      | 3.750950                                       | -0.831473      | -2.730950      |
| H(11B) | 3.161158                                       | 1.286526       | -3.051803      | 3.233388                                       | 1.134592       | -3.178408      | 3.654343                                       | 0.791712       | -3.409037      |
| C(12)  | 4.537153                                       | 0.065579       | -4.205147      | 4.664909                                       | -0.087725      | -4.258553      | 5.285048                                       | -0.397707      | -4.202279      |
| H(11A) | 5.177686                                       | 0.900480       | -4.529538      | 5.292247                                       | 0.751675       | -4.597283      | 5.893839                                       | 0.461687       | -4.524855      |
| H(11B) | 5.203256                                       | -0.795335      | -4.039473      | 5.348173                                       | -0.925559      | -4.049410      | 5.990284                                       | -1.164283      | -3.844366      |
| C(13)  | 3.542965                                       | -0.272740      | -5.322772      | 3.703382                                       | -0.487416      | -5.384089      | 4.507534                                       | -0.947250      | -5.404033      |
| H(13A) | 2.901067                                       | -1.105662      | -4.996171      | 3.070975                                       | -1.321087      | -5.040912      | 3.898461                                       | -1.805422      | -5.078902      |
| H(13B) | 2.872581                                       | 0.586316       | -5.483695      | 3.019472                                       | 0.351038       | -5.590607      | 3.796170                                       | -0.182841      | -5.755295      |
| C(14)  | 4.225967                                       | -0.640910      | -6.642973      | 4.421837                                       | -0.889279      | -6.675422      | 5.412149                                       | -1.372656      | -6.564201      |
| H(14A) | 4.848600                                       | 0.187031       | -7.012793      | 5.035449                                       | -0.062527      | -7.062652      | 6.011286                                       | -0.526223      | -6.930929      |
| H(14B) | 3.486751                                       | -0.876429      | -7.420791      | 3.704613                                       | -1.168759      | -7.459322      | 4.823640                                       | -1.756644      | -7.408865      |
| H(14C) | 4.875962                                       | -1.519956      | -6.522139      | 5.086890                                       | -1.749280      | -6.508464      | 6.108939                                       | -2.165278      | -6.254086      |
| H(7A)  | 6.533673                                       | 0.458562       | 0.508872       | 6.531326                                       | 0.534025       | 0.495963       | 6.498981                                       | 0.660676       | 0.691063       |
| H(7B)  | 5.868171                                       | -1.171112      | 0.725047       | 5.924884                                       | -1.111358      | 0.748726       | 5.964317                                       | -0.998335      | 0.988848       |
| H(8A)  | 6.495723                                       | -0.430985      | -1.762938      | 6.576671                                       | -0.449014      | -1.735790      | 6.844768                                       | -0.486161      | -1.425889      |
| H(8B)  | 4.952455                                       | -1.271645      | -1.460285      | 5.043754                                       | -1.310629      | -1.442877      | 5.321600                                       | -1.391798      | -1.250939      |
| H(9A)  | 6.297082                                       | 2.476164       | 0.026687       | 6.301088                                       | 2.490092       | -0.071942      | 6.297557                                       | 2.501689       | -0.044259      |
| H(9B)  | 5.641256                                       | 3.882338       | -0.832771      | 5.620009                                       | 3.860208       | -0.965543      | 5.651821                                       | 3.795405       | -1.063402      |
| H(10A) | 6.494952                                       | 1.834982       | -2.336541      | 6.518415                                       | 1.819062       | -2.419234      | 6.735001                                       | 1.771032       | -2.335288      |
| H(10B) | 4.945160                                       | 2.618895       | -2.719486      | 4.944553                                       | 2.543725       | -2.818650      | 5.150433                                       | 2.365773       | -2.881029      |
| Br(1)  | 2.192268                                       | -1.773161      | -0.015762      | 2.195409                                       | -1.770156      | -0.021808      | 2.202875                                       | -1.763393      | -0.053948      |

**Table 37S.** Cartesian coordinates for azaester derivative (X = 2-Br, R = Bu) with B-N distance constrained to 2.4 Å (a), 2.5 Å (b) and 2.6 Å (c).

| Atom   | $d_{\text{B-N}} = 2.4 \text{ \AA} \text{ (a)}$ |                |                | $d_{\text{B-N}} = 2.5 \text{ \AA} \text{ (b)}$ |                |                | $d_{\text{B-N}} = 2.6 \text{ \AA} \text{ (c)}$ |                |                |
|--------|------------------------------------------------|----------------|----------------|------------------------------------------------|----------------|----------------|------------------------------------------------|----------------|----------------|
|        | $x / \text{Å}$                                 | $y / \text{Å}$ | $z / \text{Å}$ | $x / \text{Å}$                                 | $y / \text{Å}$ | $z / \text{Å}$ | $x / \text{Å}$                                 | $y / \text{Å}$ | $z / \text{Å}$ |
| C(1)   | 2.167311                                       | 1.177934       | 0.000000       | 2.163075                                       | 1.180517       | 0.000000       | 2.161701                                       | 1.180560       | 0.000000       |
| C(2)   | 1.398362                                       | 0.000000       | 0.000000       | 1.398226                                       | 0.000000       | 0.000000       | 1.397964                                       | 0.000000       | 0.000000       |
| C(3)   | 0.000000                                       | 0.000000       | 0.000000       | 0.000000                                       | 0.000000       | 0.000000       | 0.000000                                       | 0.000000       | 0.000000       |
| C(4)   | -0.687900                                      | 1.214750       | 0.009558       | -0.688521                                      | 1.214512       | 0.011687       | -0.687755                                      | 1.215236       | 0.002537       |
| C(5)   | 0.029321                                       | 2.413607       | 0.006215       | 0.026518                                       | 2.414770       | 0.005740       | 0.027274                                       | 2.415416       | -0.012039      |
| C(6)   | 1.423616                                       | 2.381589       | -0.005947      | 1.420715                                       | 2.384435       | -0.008063      | 1.421770                                       | 2.385172       | -0.020922      |
| H(2)   | -0.544064                                      | -0.942429      | -0.006204      | -0.543838                                      | -0.942556      | -0.010260      | -0.544296                                      | -0.942363      | -0.006619      |
| H(3)   | -1.778575                                      | 1.216401       | 0.016205       | -1.779188                                      | 1.215075       | 0.018906       | -1.778411                                      | 1.216383       | 0.008750       |
| H(5)   | -0.495996                                      | 3.369171       | 0.012534       | -0.500355                                      | 3.369442       | 0.009460       | -0.499822                                      | 3.369946       | -0.017909      |
| H(6)   | 1.979294                                       | 3.317878       | -0.013933      | 1.975258                                       | 3.321637       | -0.021495      | 1.976438                                       | 3.322466       | -0.039059      |
| B(1)   | 3.756297                                       | 1.297595       | 0.016898       | 3.747533                                       | 1.297841       | 0.033423       | 3.744126                                       | 1.294046       | 0.067003       |
| O(1)   | 4.222177                                       | 2.597299       | -0.226035      | 4.226533                                       | 2.544190       | -0.351011      | 4.241772                                       | 2.488814       | -0.424026      |
| O(2)   | 4.469869                                       | 0.319957       | 0.706327       | 4.438835                                       | 0.330148       | 0.734243       | 4.399322                                       | 0.369686       | 0.847668       |
| N(1)   | 4.847494                                       | 0.651481       | -1.901910      | 5.146031                                       | 0.514164       | -1.884924      | 5.403061                                       | 0.377815       | -1.713011      |
| C(7)   | 5.729091                                       | -0.135238      | 0.255090       | 5.767605                                       | -0.061884      | 0.442190       | 5.764377                                       | 0.011465       | 0.715740       |
| C(8)   | 5.646352                                       | -0.396303      | -1.261589      | 5.888928                                       | -0.424846      | -1.051473      | 6.058629                                       | -0.462767      | -0.719816      |
| C(9)   | 5.495145                                       | 2.765139       | -0.813427      | 5.546676                                       | 2.719280       | -0.830497      | 5.601913                                       | 2.669534       | -0.777643      |
| C(10)  | 5.537317                                       | 1.928342       | -2.109893      | 5.759298                                       | 1.825531       | -2.070046      | 5.981217                                       | 1.699990       | -1.915958      |
| C(11)  | 4.046615                                       | 0.195963       | -3.051399      | 4.566983                                       | -0.069707      | -3.102410      | 5.025013                                       | -0.321131      | -2.947300      |
| H(11A) | 3.431936                                       | -0.645236      | -2.705257      | 3.965312                                       | -0.936041      | -2.794621      | 4.410365                                       | -1.184931      | -2.657335      |
| H(11B) | 3.352690                                       | 1.009531       | -3.305105      | 3.863167                                       | 0.668050       | -3.514468      | 4.367464                                       | 0.351846       | -3.516775      |
| C(12)  | 4.840317                                       | -0.217611      | -4.298744      | 5.563821                                       | -0.493465      | -4.192087      | 6.181350                                       | -0.787701      | -3.845888      |
| H(11A) | 5.467967                                       | 0.621945       | -4.637057      | 6.171409                                       | 0.372868       | -4.498102      | 6.800827                                       | 0.076940       | -4.132831      |
| H(11B) | 5.527111                                       | -1.039750      | -4.043716      | 6.264523                                       | -1.238081      | -3.782449      | 6.837256                                       | -1.468323      | -3.280522      |
| C(13)  | 3.924127                                       | -0.659318      | -5.446074      | 4.861559                                       | -1.080631      | -5.421845      | 5.686162                                       | -1.497278      | -5.111506      |
| H(13A) | 3.291703                                       | -1.493442      | -5.103688      | 4.253441                                       | -1.945148      | -5.111875      | 5.063245                                       | -2.358780      | -4.823056      |
| H(13B) | 3.236279                                       | 0.163784       | -5.696576      | 4.153944                                       | -0.337508      | -5.823011      | 5.026073                                       | -0.816929      | -5.672976      |
| C(14)  | 4.691991                                       | -1.082801      | -6.701678      | 5.832089                                       | -1.508244      | -6.526582      | 6.822278                                       | -1.971807      | -6.022224      |
| H(14A) | 5.307014                                       | -0.256916      | -7.088556      | 6.431472                                       | -0.656160      | -6.879714      | 7.445142                                       | -1.127236      | -6.352285      |
| H(14B) | 4.006598                                       | -1.392829      | -7.502480      | 5.294950                                       | -1.920597      | -7.391914      | 6.432473                                       | -2.470957      | -6.920169      |
| H(14C) | 5.363168                                       | -1.928044      | -6.489652      | 6.528728                                       | -2.279676      | -6.166598      | 7.477094                                       | -2.685158      | -5.500403      |
| H(7A)  | 6.529449                                       | 0.578094       | 0.502346       | 6.487825                                       | 0.714058       | 0.735484       | 6.423360                                       | 0.835551       | 1.018909       |
| H(7B)  | 5.955526                                       | -1.073112      | 0.780514       | 5.985320                                       | -0.950423      | 1.049994       | 5.946714                                       | -0.818336      | 1.411654       |
| H(8A)  | 6.660662                                       | -0.480288      | -1.688925      | 6.960043                                       | -0.491087      | -1.321085      | 7.156613                                       | -0.522492      | -0.853851      |
| H(8B)  | 5.126945                                       | -1.347316      | -1.421209      | 5.443595                                       | -1.415018      | -1.200661      | 5.654443                                       | -1.475378      | -0.834942      |
| H(9A)  | 6.300372                                       | 2.486301       | -0.119037      | 6.287198                                       | 2.517146       | -0.045506      | 6.257121                                       | 2.556655       | 0.095445       |
| H(9B)  | 5.622951                                       | 3.829930       | -1.051812      | 5.657096                                       | 3.773939       | -1.116920      | 5.711753                                       | 3.703244       | -1.132329      |
| H(10A) | 6.579132                                       | 1.798192       | -2.449499      | 6.839720                                       | 1.770607       | -2.301539      | 7.083712                                       | 1.683786       | -2.019679      |
| H(10B) | 4.995307                                       | 2.475303       | -2.890376      | 5.261635                                       | 2.303075       | -2.923085      | 5.569066                                       | 2.096944       | -2.852036      |
| Br(1)  | 2.196415                                       | -1.768378      | -0.037791      | 2.204739                                       | -1.761293      | -0.068212      | 2.213381                                       | -1.756121      | -0.061637      |

**Table 38S.** Cartesian coordinates for azaester derivative (X = 2-Br, R = Bu) with B-N distance constrained to 2.7 Å (a), 2.8 Å (b) and 2.9 Å (c).

| Atom   | $d_{\text{B-N}} = 2.7 \text{ \AA} \text{ (a)}$ |                   |                   | $d_{\text{B-N}} = 2.8 \text{ \AA} \text{ (b)}$ |                   |                   | $d_{\text{B-N}} = 2.9 \text{ \AA} \text{ (c)}$ |                   |                   |
|--------|------------------------------------------------|-------------------|-------------------|------------------------------------------------|-------------------|-------------------|------------------------------------------------|-------------------|-------------------|
|        | $x / \text{ \AA}$                              | $y / \text{ \AA}$ | $z / \text{ \AA}$ | $x / \text{ \AA}$                              | $y / \text{ \AA}$ | $z / \text{ \AA}$ | $x / \text{ \AA}$                              | $y / \text{ \AA}$ | $z / \text{ \AA}$ |
| C(1)   | 2.160847                                       | 1.181040          | 0.000000          | 2.098452                                       | 1.208495          | 0.000000          | 2.097660                                       | 1.208839          | 0.000000          |
| C(2)   | 1.398030                                       | 0.000000          | 0.000000          | 1.394976                                       | 0.000000          | 0.000000          | 1.394975                                       | 0.000000          | 0.000000          |
| C(3)   | 0.000000                                       | 0.000000          | 0.000000          | 0.000000                                       | 0.000000          | 0.000000          | 0.000000                                       | 0.000000          | 0.000000          |
| C(4)   | -0.687668                                      | 1.215228          | 0.009591          | -0.698411                                      | 1.207229          | 0.003449          | -0.698487                                      | 1.207236          | 0.003162          |
| C(5)   | 0.026998                                       | 2.415760          | 0.000916          | -0.000885                                      | 2.415176          | 0.005485          | -0.001253                                      | 2.415366          | 0.004472          |
| C(6)   | 1.421445                                       | 2.385898          | -0.013283         | 1.393915                                       | 2.416517          | 0.002176          | 1.393567                                       | 2.416953          | 0.001093          |
| H(2)   | -0.544201                                      | -0.942366         | -0.010161         | -0.548835                                      | -0.952572         | -0.000777         | -0.548775                                      | -0.952623         | -0.000950         |
| H(3)   | -1.778315                                      | 1.216347          | 0.016667          | -1.798001                                      | 1.206887          | 0.004821          | -1.798087                                      | 1.206718          | 0.004498          |
| H(5)   | -0.500407                                      | 3.370117          | 0.000891          | -0.550636                                      | 3.367236          | 0.008485          | -0.551168                                      | 3.367339          | 0.006437          |
| H(6)   | 1.975522                                       | 3.323632          | -0.033290         | 1.946064                                       | 3.369020          | -0.002788         | 1.945798                                       | 3.369306          | -0.006249         |
| B(1)   | 3.743319                                       | 1.292973          | 0.032546          | 3.596522                                       | 1.203228          | -0.013837         | 3.595184                                       | 1.204917          | -0.010211         |
| O(1)   | 4.233551                                       | 2.455271          | -0.529569         | 4.148879                                       | 2.363803          | -0.335440         | 4.146718                                       | 2.341622          | -0.404393         |
| O(2)   | 4.419115                                       | 0.374777          | 0.796464          | 4.144830                                       | 0.092793          | 0.455824          | 4.144209                                       | 0.104569          | 0.478404          |
| N(1)   | 5.518204                                       | 0.338154          | -1.764146         | 5.383066                                       | 0.485023          | -2.046678         | 5.588892                                       | 0.423417          | -1.965815         |
| C(7)   | 5.798470                                       | 0.056344          | 0.694383          | 5.514143                                       | -0.235531         | 0.334584          | 5.527443                                       | -0.185278         | 0.460267          |
| C(8)   | 6.149058                                       | -0.450375         | -0.716880         | 5.950375                                       | -0.473033         | -1.116874         | 6.081085                                       | -0.474808         | -0.940045         |
| C(9)   | 5.597827                                       | 2.658937          | -0.861573         | 5.516950                                       | 2.538820          | -0.643238         | 5.529313                                       | 2.534601          | -0.624806         |
| C(10)  | 6.039740                                       | 1.680699          | -1.969808         | 5.938725                                       | 1.819970          | -1.930868         | 6.067979                                       | 1.786635          | -1.849874         |
| C(11)  | 5.222425                                       | -0.404037         | -2.993140         | 5.303473                                       | 0.000409          | -3.412419         | 5.686892                                       | -0.116194         | -3.309706         |
| H(11A) | 4.628983                                       | -1.284561         | -2.707684         | 4.712851                                       | -0.959801         | -3.394647         | 5.136098                                       | -1.099934         | -3.317762         |
| H(11B) | 4.564494                                       | 0.227160          | -3.608634         | 4.705173                                       | 0.752695          | -4.001745         | 5.131741                                       | 0.585933          | -3.995268         |
| C(12)  | 6.432505                                       | -0.848161         | -3.831699         | 6.627386                                       | -0.250111         | -4.135083         | 7.093698                                       | -0.336574         | -3.866640         |
| H(11A) | 7.026346                                       | 0.033287          | -4.122210         | 7.225534                                       | 0.697889          | -4.174407         | 7.655327                                       | 0.634172          | -3.879538         |
| H(11B) | 7.093209                                       | -1.482499         | -3.219982         | 7.234461                                       | -1.004016         | -3.568416         | 7.660801                                       | -1.041029         | -3.203247         |
| C(13)  | 6.017616                                       | -1.616294         | -5.091803         | 6.375376                                       | -0.751605         | -5.540024         | 7.023802                                       | -0.902469         | -5.268015         |
| H(13A) | 5.421538                                       | -2.495510         | -4.799882         | 5.775110                                       | -1.698975         | -5.497293         | 6.459594                                       | -1.872561         | -5.252279         |
| H(13B) | 5.351034                                       | -0.982766         | -5.698608         | 5.762407                                       | 0.001965          | -6.102214         | 6.450676                                       | -0.198436         | -5.927945         |
| C(14)  | 7.207313                                       | -2.067242         | -5.944292         | 7.666187                                       | -1.003609         | -6.275585         | 8.399116                                       | -1.126690         | -5.841592         |
| H(14A) | 7.803680                                       | -1.205946         | -6.280038         | 8.267274                                       | -0.065291         | -6.351001         | 8.968188                                       | -0.166845         | -5.889449         |
| H(14B) | 6.874541                                       | -2.612573         | -6.838342         | 7.457606                                       | -1.372786         | -7.308692         | 8.324654                                       | -1.544395         | -6.874589         |
| H(14C) | 7.873475                                       | -2.732327         | -5.375136         | 8.280144                                       | -1.770511         | -5.744219         | 8.977341                                       | -1.845052         | -5.211479         |
| H(7A)  | 6.423891                                       | 0.907832          | 0.991105          | 6.157680                                       | 0.520182          | 0.849796          | 6.113169                                       | 0.606988          | 0.989202          |
| H(7B)  | 5.991134                                       | -0.748515         | 1.416270          | 5.598873                                       | -1.209362         | 0.896274          | 5.598261                                       | -1.133511         | 1.067484          |
| H(8A)  | 7.253920                                       | -0.491403         | -0.802838         | 7.079648                                       | -0.476229         | -1.139429         | 7.208698                                       | -0.462075         | -0.865882         |
| H(8B)  | 5.772919                                       | -1.475951         | -0.814166         | 5.600554                                       | -1.501019         | -1.419263         | 5.770080                                       | -1.521308         | -1.222209         |
| H(9A)  | 6.234725                                       | 2.587843          | 0.028582          | 6.165807                                       | 2.263936          | 0.225102          | 6.121612                                       | 2.314206          | 0.297668          |
| H(9B)  | 5.686791                                       | 3.686654          | -1.238839         | 5.606090                                       | 3.650203          | -0.810333         | 5.603982                                       | 3.641386          | -0.830503         |
| H(10A) | 7.145281                                       | 1.716444          | -2.045247         | 7.067577                                       | 1.820015          | -1.969517         | 7.196035                                       | 1.841277          | -1.808752         |
| H(10B) | 5.635984                                       | 2.043775          | -2.923330         | 5.566632                                       | 2.428049          | -2.804037         | 5.731849                                       | 2.346910          | -2.768928         |
| Br(1)  | 2.215398                                       | -1.754188         | -0.063748         | 2.355312                                       | -1.651095         | 0.008741          | 2.356107                                       | -1.650635         | 0.008162          |

**Table 39S.** Cartesian coordinates for azaester derivative (X = 2-Br, R = Bu) with B-N distance constrained to 3.0 Å (a), 3.1 Å (b) and 3.2 Å (c).

| Atom   | $d_{\text{B-N}} = 3.0 \text{ \AA} \text{ (a)}$ |                   |                   | $d_{\text{B-N}} = 3.1 \text{ \AA} \text{ (b)}$ |                   |                   | $d_{\text{B-N}} = 3.2 \text{ \AA} \text{ (c)}$ |                   |                   |
|--------|------------------------------------------------|-------------------|-------------------|------------------------------------------------|-------------------|-------------------|------------------------------------------------|-------------------|-------------------|
|        | $x / \text{ \AA}$                              | $y / \text{ \AA}$ | $z / \text{ \AA}$ | $x / \text{ \AA}$                              | $y / \text{ \AA}$ | $z / \text{ \AA}$ | $x / \text{ \AA}$                              | $y / \text{ \AA}$ | $z / \text{ \AA}$ |
| C(1)   | 2.097502                                       | 1.209006          | 0.000000          | 2.096824                                       | 1.209256          | 0.000000          | 2.096958                                       | 1.209498          | 0.000000          |
| C(2)   | 1.394944                                       | 0.000000          | 0.000000          | 1.394872                                       | 0.000000          | 0.000000          | 1.394899                                       | 0.000000          | 0.000000          |
| C(3)   | 0.000000                                       | 0.000000          | 0.000000          | 0.000000                                       | 0.000000          | 0.000000          | 0.000000                                       | 0.000000          | 0.000000          |
| C(4)   | -0.698589                                      | 1.207210          | 0.002492          | -0.698577                                      | 1.207179          | 0.002513          | -0.698780                                      | 1.207153          | 0.002112          |
| C(5)   | -0.001509                                      | 2.415395          | 0.003073          | -0.001823                                      | 2.415445          | 0.002434          | -0.002117                                      | 2.415583          | 0.001600          |
| C(6)   | 1.393324                                       | 2.417111          | 0.000237          | 1.392945                                       | 2.417363          | -0.000708         | 1.392701                                       | 2.417615          | -0.001673         |
| H(2)   | -0.548709                                      | -0.952681         | -0.000914         | -0.548698                                      | -0.952694         | -0.001188         | -0.548584                                      | -0.952805         | -0.001404         |
| H(3)   | -1.798215                                      | 1.206570          | 0.003536          | -1.798199                                      | 1.206422          | 0.004004          | -1.798453                                      | 1.206241          | 0.003327          |
| H(5)   | -0.551471                                      | 3.367351          | 0.003918          | -0.551968                                      | 3.367283          | 0.002634          | -0.552328                                      | 3.367412          | 0.001420          |
| H(6)   | 1.945388                                       | 3.369572          | -0.007803         | 1.945164                                       | 3.369641          | -0.010584         | 1.944736                                       | 3.370132          | -0.010969         |
| B(1)   | 3.593990                                       | 1.207213          | -0.004708         | 3.591872                                       | 1.208733          | -0.003657         | 3.589805                                       | 1.208527          | 0.000700          |
| O(1)   | 4.149656                                       | 2.345573          | -0.386210         | 4.152599                                       | 2.325818          | -0.436735         | 4.160838                                       | 2.349680          | -0.349632         |
| O(2)   | 4.147559                                       | 0.085557          | 0.425880          | 4.153540                                       | 0.092825          | 0.431417          | 4.164101                                       | 0.059743          | 0.323598          |
| N(1)   | 5.792662                                       | 0.506277          | -1.921614         | 5.979929                                       | 0.525556          | -1.858503         | 6.164574                                       | 0.495137          | -1.760447         |
| C(7)   | 5.537156                                       | -0.165299         | 0.487526          | 5.543352                                       | -0.117285         | 0.579644          | 5.535365                                       | -0.088719         | 0.632746          |
| C(8)   | 6.201450                                       | -0.405430         | -0.872995         | 6.322875                                       | -0.343359         | -0.752701         | 6.497695                                       | -0.232267         | -0.555493         |
| C(9)   | 5.539158                                       | 2.571889          | -0.512069         | 5.542768                                       | 2.573548          | -0.501781         | 5.552494                                       | 2.580701          | -0.454908         |
| C(10)  | 6.185249                                       | 1.885926          | -1.720753         | 6.257458                                       | 1.932548          | -1.660310         | 6.222742                                       | 1.939191          | -1.670994         |
| C(11)  | 6.065971                                       | 0.013197          | -3.259191         | 6.426504                                       | 0.026046          | -3.146150         | 6.800676                                       | -0.030852         | -2.954005         |
| H(11A) | 5.559078                                       | -0.989130         | -3.357425         | 5.997810                                       | -1.009237         | -3.271311         | 6.459409                                       | -1.099755         | -3.067263         |
| H(11B) | 5.566095                                       | 0.715779          | -3.985608         | 5.963967                                       | 0.680388          | -3.939290         | 6.399313                                       | 0.547677          | -3.834323         |
| C(12)  | 7.534765                                       | -0.139315         | -3.656173         | 7.935719                                       | -0.037747         | -3.382982         | 8.328814                                       | 0.000323          | -3.003857         |
| H(11A) | 8.058423                                       | 0.848816          | -3.571381         | 8.384009                                       | 0.984540          | -3.275123         | 8.696784                                       | 1.055173          | -2.907853         |
| H(11B) | 8.047644                                       | -0.849615         | -2.955946         | 8.416191                                       | -0.695587         | -2.612180         | 8.750723                                       | -0.579536         | -2.141483         |
| C(13)  | 7.646887                                       | -0.653944         | -5.074533         | 8.229308                                       | -0.577528         | -4.765779         | 8.824398                                       | -0.591932         | -4.305146         |
| H(13A) | 7.120340                                       | -1.641675         | -5.157004         | 7.775745                                       | -1.598489         | -4.873298         | 8.455267                                       | -1.647487         | -4.400835         |
| H(13B) | 7.128066                                       | 0.055503          | -5.772490         | 7.745460                                       | 0.080845          | -5.535276         | 8.396482                                       | -0.013627         | -5.166599         |
| C(14)  | 9.086206                                       | -0.811824         | -5.491914         | 9.711839                                       | -0.653097         | -5.025201         | 10.329244                                      | -0.573665         | -4.381745         |
| H(14A) | 9.620140                                       | 0.168114          | -5.446452         | 10.177955                                      | 0.359047          | -4.949411         | 10.715329                                      | 0.472171          | -4.313916         |
| H(14B) | 9.146093                                       | -1.197858         | -6.538096         | 9.906051                                       | -1.055017         | -6.048848         | 10.673365                                      | -1.014620         | -5.348307         |
| H(14C) | 9.615598                                       | -1.530042         | -4.820093         | 10.208878                                      | -1.323481         | -4.282920         | 10.774278                                      | -1.165651         | -3.545725         |
| H(7A)  | 6.064059                                       | 0.623309          | 1.079893          | 6.012606                                       | 0.698977          | 1.183155          | 5.868465                                       | 0.712917          | 1.340276          |
| H(7B)  | 5.593671                                       | -1.130002         | 1.071437          | 5.587010                                       | -1.064186         | 1.194312          | 5.556266                                       | -1.068072         | 1.196382          |
| H(8A)  | 7.319207                                       | -0.384617         | -0.703164         | 7.423984                                       | -0.289412         | -0.498573         | 7.525277                                       | 0.042840          | -0.169348         |
| H(8B)  | 5.927140                                       | -1.447653         | -1.206249         | 6.101109                                       | -1.400075         | -1.081015         | 6.524781                                       | -1.327346         | -0.828884         |
| H(9A)  | 6.075945                                       | 2.339579          | 0.440825          | 6.036290                                       | 2.381311          | 0.482681          | 6.085342                                       | 2.335497          | 0.496339          |
| H(9B)  | 5.599157                                       | 3.686910          | -0.679178         | 5.588586                                       | 3.685488          | -0.696643         | 5.603393                                       | 3.700435          | -0.600823         |
| H(10A) | 7.304484                                       | 1.997191          | -1.604102         | 7.360792                                       | 2.128056          | -1.503740         | 7.290180                                       | 2.316055          | -1.675735         |
| H(10B) | 5.878874                                       | 2.460518          | -2.641905         | 5.946354                                       | 2.465785          | -2.604850         | 5.711700                                       | 2.338001          | -2.595123         |
| Br(1)  | 2.356085                                       | -1.650649         | 0.006057          | 2.356772                                       | -1.650208         | 0.006067          | 2.356830                                       | -1.650221         | 0.002064          |

**Table 40S.** Cartesian coordinates for azaester derivative (X = 2-Br, R = Bu) with B-N distance constrained to 3.3 Å (*a*).

| <i>Atom</i> | <i>d</i> <sub>B-N</sub> = 3.3 Å ( <i>a</i> ) |              |              |
|-------------|----------------------------------------------|--------------|--------------|
|             | <i>x</i> / Å                                 | <i>y</i> / Å | <i>z</i> / Å |
| C(1)        | 2.097405                                     | 1.209458     | 0.000000     |
| C(2)        | 1.394859                                     | 0.000000     | 0.000000     |
| C(3)        | 0.000000                                     | 0.000000     | 0.000000     |
| C(4)        | -0.698714                                    | 1.207201     | 0.002727     |
| C(5)        | -0.002009                                    | 2.415625     | 0.002555     |
| C(6)        | 1.392768                                     | 2.417592     | -0.001006    |
| H(2)        | -0.548598                                    | -0.952816    | -0.002170    |
| H(3)        | -1.798435                                    | 1.206328     | 0.004051     |
| H(5)        | -0.552208                                    | 3.367481     | 0.003036     |
| H(6)        | 1.944795                                     | 3.370271     | -0.008120    |
| B(1)        | 3.587836                                     | 1.207139     | 0.001403     |
| O(1)        | 4.171418                                     | 2.374909     | -0.216119    |
| O(2)        | 4.177020                                     | 0.029434     | 0.164262     |
| N(1)        | 6.336488                                     | 0.605753     | -1.722908    |
| C(7)        | 5.518970                                     | -0.118868    | 0.584273     |
| C(8)        | 6.603507                                     | -0.126294    | -0.505536    |
| C(9)        | 5.565201                                     | 2.595774     | -0.330041    |
| C(10)       | 6.208456                                     | 2.044291     | -1.602742    |
| C(11)       | 7.162015                                     | 0.198186     | -2.844103    |
| H(11A)      | 6.932079                                     | -0.887572    | -3.044735    |
| H(11B)      | 6.825489                                     | 0.788692     | -3.743410    |
| C(12)       | 8.675986                                     | 0.354113     | -2.694786    |
| H(11A)      | 8.938257                                     | 1.426159     | -2.497116    |
| H(11B)      | 9.036102                                     | -0.243947    | -1.816912    |
| C(13)       | 9.378372                                     | -0.114591    | -3.950554    |
| H(13A)      | 9.112369                                     | -1.186444    | -4.150561    |
| H(13B)      | 9.016054                                     | 0.484277     | -4.827875    |
| C(14)       | 10.874249                                    | 0.020973     | -3.829149    |
| H(14A)      | 11.161415                                    | 1.086549     | -3.657347    |
| H(14B)      | 11.372437                                    | -0.332161    | -4.764142    |
| H(14C)      | 11.257631                                    | -0.586754    | -2.974092    |
| H(7A)       | 5.758898                                     | 0.621222     | 1.391182     |
| H(7B)       | 5.517427                                     | -1.146452    | 1.054779     |
| H(8A)       | 7.556791                                     | 0.224733     | -0.005964    |
| H(8B)       | 6.762433                                     | -1.203946    | -0.803634    |
| H(9A)       | 6.110582                                     | 2.276426     | 0.591973     |
| H(9B)       | 5.622949                                     | 3.723306     | -0.393439    |
| H(10A)      | 7.215872                                     | 2.554948     | -1.683518    |
| H(10B)      | 5.582060                                     | 2.378089     | -2.480815    |
| Br(1)       | 2.356322                                     | -1.650508    | -0.003226    |

**Table 41S.** Cartesian coordinates for azaester derivative (X = H, R = Bu) with B-N distance constrained to 1.5 Å (*a*), 1.6 Å (*b*) and 1.7 Å (*c*).

| <i>Atom</i> | $d_{\text{B-N}} = 1.5 \text{ \AA} \text{ (a)}$ |              |              | $d_{\text{B-N}} = 1.6 \text{ \AA} \text{ (b)}$ |              |              | $d_{\text{B-N}} = 1.7 \text{ \AA} \text{ (c)}$ |              |              |
|-------------|------------------------------------------------|--------------|--------------|------------------------------------------------|--------------|--------------|------------------------------------------------|--------------|--------------|
|             | <i>x</i> / Å                                   | <i>y</i> / Å | <i>z</i> / Å | <i>x</i> / Å                                   | <i>y</i> / Å | <i>z</i> / Å | <i>x</i> / Å                                   | <i>y</i> / Å | <i>z</i> / Å |
| C(1)        | 1.194590                                       | 0.000000     | 2.144456     | 1.195362                                       | 0.000000     | 2.142725     | 1.197001                                       | 0.000000     | 2.140302     |
| C(2)        | 0.000000                                       | 0.000000     | 1.399726     | 0.000000                                       | 0.000000     | 1.399827     | 0.000000                                       | 0.000000     | 1.399488     |
| C(3)        | 0.000000                                       | 0.000000     | 0.000000     | 0.000000                                       | 0.000000     | 0.000000     | 0.000000                                       | 0.000000     | 0.000000     |
| C(4)        | 1.211126                                       | 0.017271     | -0.699073    | 1.211419                                       | 0.013317     | -0.699356    | 1.211412                                       | -0.000938    | -0.699799    |
| C(5)        | 2.413648                                       | 0.037764     | 0.015737     | 2.414713                                       | 0.037080     | 0.014451     | 2.415730                                       | 0.006397     | 0.012134     |
| C(6)        | 2.398725                                       | 0.023567     | 1.415223     | 2.399488                                       | 0.035083     | 1.413670     | 2.401370                                       | 0.008747     | 1.411489     |
| H(2)        | -0.954978                                      | 0.031739     | 1.927377     | -0.952099                                      | 0.023822     | 1.931760     | -0.950826                                      | 0.025818     | 1.933561     |
| H(3)        | -0.944851                                      | 0.000912     | -0.546774    | -0.944818                                      | 0.004176     | -0.546710    | -0.944428                                      | 0.010658     | -0.547116    |
| H(4)        | 1.217444                                       | 0.028289     | -1.790098    | 1.217887                                       | 0.020118     | -1.790495    | 1.216870                                       | 0.002998     | -1.790932    |
| H(5)        | 3.364276                                       | 0.070666     | -0.519815    | 3.365010                                       | 0.068956     | -0.521733    | 3.365575                                       | 0.022262     | -0.525385    |
| H(6)        | 3.343613                                       | 0.052456     | 1.959299     | 3.344471                                       | 0.084410     | 1.956713     | 3.346625                                       | 0.041847     | 1.955062     |
| B(1)        | 1.183269                                       | -0.039605    | 3.766401     | 1.183187                                       | 0.009417     | 3.759025     | 1.189546                                       | -0.000773    | 3.747770     |
| O(1)        | -0.011116                                      | 0.720003     | 4.270996     | -0.088241                                      | 0.594120     | 4.252844     | -0.063763                                      | 0.536530     | 4.277074     |
| O(2)        | 2.460405                                       | 0.481570     | 4.290723     | 2.402068                                       | 0.640822     | 4.280261     | 2.428030                                       | 0.559823     | 4.288300     |
| N(1)        | 1.033118                                       | -1.380765    | 4.421188     | 1.193532                                       | -1.417627    | 4.482515     | 1.200725                                       | -1.538488    | 4.472549     |
| C(7)        | -0.726210                                      | -0.019578    | 5.228392     | -0.637791                                      | -0.137348    | 5.320898     | -0.430373                                      | -0.072958    | 5.486453     |
| C(8)        | -0.420101                                      | -1.472210    | 4.847723     | -0.198949                                      | -1.579525    | 5.044157     | -0.054175                                      | -1.547937    | 5.306069     |
| C(9)        | 2.543162                                       | 0.098388     | 5.637704     | 2.602570                                       | 0.224860     | 5.606028     | 2.798561                                       | -0.045428    | 5.498564     |
| C(10)       | 1.960583                                       | -1.341001    | 5.645603     | 2.234598                                       | -1.277474    | 5.586092     | 2.450941                                       | -1.526679    | 5.312846     |
| C(11)       | 1.400294                                       | -2.552495    | 3.539907     | 1.542935                                       | -2.562295    | 3.571175     | 1.213286                                       | -2.679577    | 3.498737     |
| H(11A)      | 0.797947                                       | -2.459108    | 2.632258     | 0.830257                                       | -2.525528    | 2.740637     | 0.336290                                       | -2.551941    | 2.854936     |
| H(11B)      | 2.444010                                       | -2.392892    | 3.244610     | 2.527602                                       | -2.332441    | 3.148257     | 2.093230                                       | -2.537866    | 2.861977     |
| C(12)       | 1.211266                                       | -3.936811    | 4.159712     | 1.539494                                       | -3.949011    | 4.215817     | 1.222334                                       | -4.072523    | 4.128553     |
| H(11A)      | 1.723667                                       | -4.014520    | 5.129200     | 2.256283                                       | -3.992518    | 5.049049     | 2.099130                                       | -4.189233    | 4.782916     |
| H(11B)      | 0.143910                                       | -4.119594    | 4.351238     | 0.549064                                       | -4.167974    | 4.640177     | 0.334252                                       | -4.209266    | 4.763447     |
| C(13)       | 1.739685                                       | -5.030944    | 3.220256     | 1.893399                                       | -5.035914    | 3.191125     | 1.246756                                       | -5.170437    | 3.056199     |
| H(13A)      | 1.323350                                       | -4.875971    | 2.213103     | 1.204401                                       | -4.964961    | 2.335600     | 0.373067                                       | -5.052774    | 2.396732     |
| H(13B)      | 2.830897                                       | -4.925823    | 3.120679     | 2.900473                                       | -4.841370    | 2.791083     | 2.133534                                       | -5.034073    | 2.418235     |
| C(14)       | 1.402876                                       | -6.443674    | 3.703638     | 1.840023                                       | -6.448754    | 3.778488     | 1.254401                                       | -6.582246    | 3.648922     |
| H(14A)      | 1.830418                                       | -6.637990    | 4.698367     | 2.538414                                       | -6.556209    | 4.621357     | 2.137566                                       | -6.741885    | 4.284724     |
| H(14B)      | 1.800321                                       | -7.202032    | 3.015831     | 2.107980                                       | -7.201626    | 3.024941     | 1.270342                                       | -7.343626    | 2.857538     |
| H(14C)      | 0.315140                                       | -6.590850    | 3.772013     | 0.831590                                       | -6.688111    | 4.146566     | 0.361218                                       | -6.759358    | 4.265826     |
| H(7A)       | -0.393507                                      | 0.190733     | 6.263262     | -0.271911                                      | 0.208826     | 6.305215     | 0.085268                                       | 0.371684     | 6.355968     |
| H(7B)       | -1.802682                                      | 0.204878     | 5.175593     | -1.734609                                      | -0.042592    | 5.325436     | -1.512298                                      | 0.036648     | 5.652510     |
| H(8A)       | -0.555720                                      | -2.232317    | 5.623497     | -0.204565                                      | -2.261774    | 5.900964     | 0.095532                                       | -2.100702    | 6.240507     |
| H(8B)       | -0.994815                                      | -1.747034    | 3.956337     | -0.820467                                      | -1.996893    | 4.244115     | -0.831441                                      | -2.047714    | 4.718678     |
| H(9A)       | 1.955397                                       | 0.766792     | 6.290714     | 1.969790                                       | 0.785992     | 6.314891     | 2.269516                                       | 0.387566     | 6.365943     |
| H(9B)       | 3.587705                                       | 0.116568     | 5.981423     | 3.652044                                       | 0.375630     | 5.898151     | 3.877226                                       | 0.083849     | 5.671593     |
| H(10A)      | 1.400702                                       | -1.609015    | 6.547166     | 1.844690                                       | -1.673228    | 6.529714     | 2.306783                                       | -2.084282    | 6.245288     |
| H(10B)      | 2.754360                                       | -2.075017    | 5.491580     | 3.110371                                       | -1.862549    | 5.292708     | 3.240403                                       | -2.010430    | 4.728272     |

**Table 42S.** Cartesian coordinates for azaester derivative (X = H, R = Bu) with B-N distance constrained to 1.8 Å (*a*), 1.9 Å (*b*) and 2.0 Å (*c*).

| Atom   | $d_{\text{B-N}} = 1.8 \text{ \AA} \text{ (a)}$ |                  |                  | $d_{\text{B-N}} = 1.9 \text{ \AA} \text{ (b)}$ |                  |                  | $d_{\text{B-N}} = 2.0 \text{ \AA} \text{ (c)}$ |                  |                  |
|--------|------------------------------------------------|------------------|------------------|------------------------------------------------|------------------|------------------|------------------------------------------------|------------------|------------------|
|        | $x / \text{\AA}$                               | $y / \text{\AA}$ | $z / \text{\AA}$ | $x / \text{\AA}$                               | $y / \text{\AA}$ | $z / \text{\AA}$ | $x / \text{\AA}$                               | $y / \text{\AA}$ | $z / \text{\AA}$ |
| C(1)   | 1.198728                                       | 0.000000         | 2.137919         | 1.198350                                       | 0.000000         | 2.138452         | 1.198727                                       | 0.000000         | 2.137881         |
| C(2)   | 0.000000                                       | 0.000000         | 1.399529         | 0.000000                                       | 0.000000         | 1.399056         | 0.000000                                       | 0.000000         | 1.398902         |
| C(3)   | 0.000000                                       | 0.000000         | 0.000000         | 0.000000                                       | 0.000000         | 0.000000         | 0.000000                                       | 0.000000         | 0.000000         |
| C(4)   | 1.210533                                       | 0.007205         | -0.700991        | 1.211929                                       | 0.003837         | -0.699191        | 1.212295                                       | 0.005090         | -0.698563        |
| C(5)   | 2.415968                                       | 0.021443         | 0.009036         | 2.417022                                       | 0.013027         | 0.011650         | 2.417676                                       | 0.013764         | 0.012046         |
| C(6)   | 2.402770                                       | 0.019764         | 1.407992         | 2.403739                                       | 0.011261         | 1.410666         | 2.404891                                       | 0.010303         | 1.410774         |
| H(2)   | -0.949798                                      | 0.015215         | 1.935471         | -0.950037                                      | 0.016962         | 1.934554         | -0.949856                                      | 0.015217         | 1.934575         |
| H(3)   | -0.944738                                      | 0.005320         | -0.546649        | -0.944152                                      | 0.006465         | -0.547453        | -0.943970                                      | 0.005105         | -0.547672        |
| H(4)   | 1.214362                                       | 0.011509         | -1.792130        | 1.217174                                       | 0.007613         | -1.790334        | 1.217790                                       | 0.009023         | -1.789708        |
| H(5)   | 3.364971                                       | 0.043750         | -0.529640        | 3.366256                                       | 0.029506         | -0.526732        | 3.366690                                       | 0.029362         | -0.526660        |
| H(6)   | 3.348275                                       | 0.054390         | 1.950992         | 3.348391                                       | 0.036774         | 1.955275         | 3.349300                                       | 0.030144         | 1.955862         |
| B(1)   | 1.198427                                       | -0.021992        | 3.738474         | 1.190408                                       | -0.032653        | 3.732547         | 1.188936                                       | -0.042742        | 3.726159         |
| O(1)   | -0.070802                                      | 0.391363         | 4.307991         | -0.059452                                      | 0.381709         | 4.314944         | -0.058497                                      | 0.319257         | 4.328735         |
| O(2)   | 2.418220                                       | 0.525160         | 4.302214         | 2.433030                                       | 0.384343         | 4.328133         | 2.432007                                       | 0.295259         | 4.338309         |
| N(1)   | 1.289204                                       | -1.673292        | 4.449086         | 1.188444                                       | -1.795676        | 4.440887         | 1.171760                                       | -1.913070        | 4.434383         |
| C(7)   | -0.394389                                      | -0.284189        | 5.496383         | -0.412196                                      | -0.301530        | 5.492185         | -0.471789                                      | -0.437044        | 5.441736         |
| C(8)   | 0.037115                                       | -1.739025        | 5.266643         | -0.064441                                      | -1.778199        | 5.244734         | -0.135423                                      | -1.903882        | 5.126063         |
| C(9)   | 2.807266                                       | -0.101664        | 5.497498         | 2.771714                                       | -0.295524        | 5.511370         | 2.687665                                       | -0.358558        | 5.558277         |
| C(10)  | 2.532508                                       | -1.596561        | 5.280010         | 2.429157                                       | -1.773617        | 5.263435         | 2.344082                                       | -1.846023        | 5.340202         |
| C(11)  | 1.357221                                       | -2.771893        | 3.439808         | 1.198289                                       | -2.870399        | 3.412396         | 1.284975                                       | -2.968450        | 3.399971         |
| H(11A) | 0.477005                                       | -2.663753        | 2.795675         | 0.324775                                       | -2.703528        | 2.770788         | 0.465157                                       | -2.808767        | 2.688495         |
| H(11B) | 2.231368                                       | -2.568254        | 2.810958         | 2.081829                                       | -2.701042        | 2.785312         | 2.214754                                       | -2.776811        | 2.849665         |
| C(12)  | 1.430549                                       | -4.186551        | 4.017271         | 1.195723                                       | -4.300797        | 3.957167         | 1.263159                                       | -4.408075        | 3.922879         |
| H(11A) | 2.301850                                       | -4.279012        | 4.683316         | 2.071512                                       | -4.459329        | 4.604833         | 2.073960                                       | -4.553594        | 4.653567         |
| H(11B) | 0.541180                                       | -4.391874        | 4.631910         | 0.306487                                       | -4.463529        | 4.585135         | 0.320611                                       | -4.598025        | 4.459124         |
| C(13)  | 1.531550                                       | -5.242194        | 2.908049         | 1.211078                                       | -5.338024        | 2.826447         | 1.416028                                       | -5.430729        | 2.789903         |
| H(13A) | 0.665782                                       | -5.145086        | 2.234694         | 0.338481                                       | -5.176084        | 2.174746         | 0.601757                                       | -5.289315        | 2.062071         |
| H(13B) | 2.422041                                       | -5.036940        | 2.294094         | 2.099053                                       | -5.173270        | 2.196629         | 2.351786                                       | -5.230129        | 2.245144         |
| C(14)  | 1.601102                                       | -6.672864        | 3.449214         | 1.206988                                       | -6.781033        | 3.338639         | 1.412697                                       | -6.879543        | 3.285461         |
| H(14A) | 2.479931                                       | -6.811091        | 4.096011         | 2.088153                                       | -6.982576        | 3.965371         | 2.244729                                       | -7.063329        | 3.981069         |
| H(14B) | 1.669958                                       | -7.402959        | 2.631480         | 1.217613                                       | -7.497888        | 2.506418         | 1.513479                                       | -7.585469        | 2.449836         |
| H(14C) | 0.707490                                       | -6.917504        | 4.041977         | 0.311983                                       | -6.984856        | 3.944669         | 0.477279                                       | -7.117043        | 3.813127         |
| H(7A)  | 0.108321                                       | 0.153572         | 6.376122         | 0.113402                                       | 0.095728         | 6.376756         | 0.014589                                       | -0.102977        | 6.373307         |
| H(7B)  | -1.478334                                      | -0.225508        | 5.673369         | -1.490883                                      | -0.185790        | 5.671704         | -1.556046                                      | -0.313749        | 5.576745         |
| H(8A)  | 0.191430                                       | -2.309520        | 6.190900         | 0.038741                                       | -2.358486        | 6.171515         | -0.136373                                      | -2.538280        | 6.024499         |
| H(8B)  | -0.722440                                      | -2.247032        | 4.662593         | -0.853036                                      | -2.233180        | 4.635211         | -0.880488                                      | -2.294889        | 4.423372         |
| H(9A)  | 2.258712                                       | 0.288408         | 6.372287         | 2.234414                                       | 0.103447         | 6.388051         | 2.104702                                       | 0.075454         | 6.386441         |
| H(9B)  | 3.878432                                       | 0.072463         | 5.676431         | 3.847867                                       | -0.177803        | 5.704302         | 3.751633                                       | -0.244889        | 5.809985         |
| H(10A) | 2.429235                                       | -2.168756        | 6.210405         | 2.312766                                       | -2.350941        | 6.190465         | 2.160969                                       | -2.375048        | 6.286467         |
| H(10B) | 3.347628                                       | -2.029545        | 4.690293         | 3.227485                                       | -2.229618        | 4.667526         | 3.184162                                       | -2.332645        | 4.832631         |



**Table 43S.** Cartesian coordinates for azaester derivative (X = H, R = Bu) with B-N distance constrained to 2.1 Å (a), 2.2 Å (b) and 2.3 Å (c).

| Atom   | $d_{\text{B-N}} = 2.1 \text{ \AA} \text{ (a)}$ |                |                | $d_{\text{B-N}} = 2.2 \text{ \AA} \text{ (b)}$ |                |                | $d_{\text{B-N}} = 2.3 \text{ \AA} \text{ (c)}$ |                |                |
|--------|------------------------------------------------|----------------|----------------|------------------------------------------------|----------------|----------------|------------------------------------------------|----------------|----------------|
|        | $x / \text{Å}$                                 | $y / \text{Å}$ | $z / \text{Å}$ | $x / \text{Å}$                                 | $y / \text{Å}$ | $z / \text{Å}$ | $x / \text{Å}$                                 | $y / \text{Å}$ | $z / \text{Å}$ |
| C(1)   | 1.199839                                       | 0.000000       | 2.136316       | 1.200267                                       | 0.000000       | 2.135735       | 1.201096                                       | 0.000000       | 2.134601       |
| C(2)   | 0.000000                                       | 0.000000       | 1.398612       | 0.000000                                       | 0.000000       | 1.398375       | 0.000000                                       | 0.000000       | 1.398140       |
| C(3)   | 0.000000                                       | 0.000000       | 0.000000       | 0.000000                                       | 0.000000       | 0.000000       | 0.000000                                       | 0.000000       | 0.000000       |
| C(4)   | 1.212102                                       | 0.002658       | -0.699008      | 1.212352                                       | 0.002099       | -0.698677      | 1.212203                                       | -0.002523      | -0.698963      |
| C(5)   | 2.418129                                       | 0.009076       | 0.010491       | 2.418665                                       | 0.006916       | 0.010506       | 2.418930                                       | -0.002977      | 0.009414       |
| C(6)   | 2.406068                                       | 0.007700       | 1.408983       | 2.406991                                       | 0.006331       | 1.408787       | 2.407893                                       | -0.000926      | 1.407493       |
| H(2)   | -0.949201                                      | 0.012247       | 1.935192       | -0.948957                                      | 0.010188       | 1.935211       | -0.948679                                      | 0.011695       | 1.935299       |
| H(3)   | -0.944015                                      | 0.005303       | -0.547490      | -0.943923                                      | 0.004768       | -0.547589      | -0.943979                                      | 0.006428       | -0.547436      |
| H(4)   | 1.216848                                       | 0.005238       | -1.790144      | 1.217147                                       | 0.004427       | -1.789835      | 1.216452                                       | -0.000856      | -1.790129      |
| H(5)   | 3.366761                                       | 0.021211       | -0.528847      | 3.367146                                       | 0.016798       | -0.529091      | 3.367176                                       | 0.000934       | -0.530616      |
| H(6)   | 3.350589                                       | 0.026041       | 1.953686       | 3.351419                                       | 0.022214       | 1.953543       | 3.352388                                       | 0.010223       | 1.952017       |
| B(1)   | 1.193047                                       | -0.038442      | 3.720311       | 1.192893                                       | -0.031862      | 3.716470       | 1.195277                                       | -0.016058      | 3.713131       |
| O(1)   | -0.058925                                      | 0.242333       | 4.328286       | -0.060841                                      | 0.189211       | 4.325207       | -0.052645                                      | 0.188723       | 4.320115       |
| O(2)   | 2.431881                                       | 0.271030       | 4.338190       | 2.428675                                       | 0.242528       | 4.336605       | 2.436504                                       | 0.200352       | 4.329309       |
| N(1)   | 1.214390                                       | -2.001805      | 4.465129       | 1.235570                                       | -2.074034      | 4.533606       | 1.202190                                       | -2.118640      | 4.645387       |
| C(7)   | -0.396705                                      | -0.479718      | 5.490147       | -0.387381                                      | -0.517182      | 5.501643       | -0.362716                                      | -0.447565      | 5.541783       |
| C(8)   | -0.048028                                      | -1.956871      | 5.224662       | -0.030123                                      | -1.998707      | 5.274174       | -0.042197                                      | -1.949282      | 5.399249       |
| C(9)   | 2.744490                                       | -0.415661      | 5.528076       | 2.732466                                       | -0.414119      | 5.547292       | 2.739278                                       | -0.428840      | 5.556401       |
| C(10)  | 2.435121                                       | -1.906610      | 5.287590       | 2.448151                                       | -1.917628      | 5.348860       | 2.434339                                       | -1.934217      | 5.415713       |
| C(11)  | 1.262749                                       | -3.061273      | 3.436076       | 1.301578                                       | -3.161490      | 3.540965       | 1.215408                                       | -3.270249      | 3.729802       |
| H(11A) | 0.398428                                       | -2.908308      | 2.776868       | 0.439660                                       | -3.040617      | 2.871070       | 0.340704                                       | -3.172407      | 3.072006       |
| H(11B) | 2.154636                                       | -2.873268      | 2.824289       | 2.195693                                       | -2.984777      | 2.928103       | 2.099629                                       | -3.163313      | 3.086225       |
| C(12)  | 1.277114                                       | -4.499602      | 3.965253       | 1.328517                                       | -4.585113      | 4.111518       | 1.217093                                       | -4.653993      | 4.394182       |
| H(11A) | 2.138224                                       | -4.641107      | 4.636873       | 2.183822                                       | -4.694120      | 4.796872       | 2.090964                                       | -4.744689      | 5.058504       |
| H(11B) | 0.375038                                       | -4.684349      | 4.569042       | 0.422268                                       | -4.762417      | 4.711604       | 0.326418                                       | -4.758260      | 5.033785       |
| C(13)  | 1.347038                                       | -5.529171      | 2.830400       | 1.424063                                       | -5.647504      | 3.009935       | 1.239983                                       | -5.792804      | 3.368087       |
| H(13A) | 0.488296                                       | -5.384176      | 2.156328       | 0.571824                                       | -5.533738      | 2.321488       | 0.370924                                       | -5.694836      | 2.698342       |
| H(13B) | 2.247074                                       | -5.338661      | 2.225175       | 2.328948                                       | -5.464478      | 2.409415       | 2.131388                                       | -5.687148      | 2.729669       |
| C(14)  | 1.364786                                       | -6.975801      | 3.332250       | 1.452994                                       | -7.078609      | 3.554270       | 1.234685                                       | -7.183144      | 4.010177       |
| H(14A) | 2.234308                                       | -7.160427      | 3.980166       | 2.317859                                       | -7.234396      | 4.215858       | 2.111235                                       | -7.323986      | 4.659637       |
| H(14B) | 1.413835                                       | -7.686743      | 2.496162       | 1.518487                                       | -7.813194      | 2.739934       | 1.253029                                       | -7.974232      | 3.247924       |
| H(14C) | 0.460001                                       | -7.205224      | 3.914160       | 0.544956                                       | -7.301296      | 4.133772       | 0.335569                                       | -7.332650      | 4.625973       |
| H(7A)  | 0.124994                                       | -0.094038      | 6.380101       | 0.129305                                       | -0.106466      | 6.382322       | 0.177718                                       | 0.006036       | 6.385266       |
| H(7B)  | -1.475421                                      | -0.371010      | 5.671164       | -1.466985                                      | -0.413359      | 5.679458       | -1.436248                                      | -0.312168      | 5.733544       |
| H(8A)  | 0.004415                                       | -2.536576      | 6.159403       | 0.003522                                       | -2.548979      | 6.229118       | -0.009875                                      | -2.432676      | 6.391172       |
| H(8B)  | -0.829161                                      | -2.395607      | 4.593005       | -0.806879                                      | -2.453104      | 4.647773       | -0.845719                                      | -2.421365      | 4.821336       |
| H(9A)  | 2.184884                                       | -0.019062      | 6.389544       | 2.160736                                       | 0.000654       | 6.391090       | 2.185609                                       | 0.022822       | 6.392321       |
| H(9B)  | 3.813924                                       | -0.280044      | 5.742603       | 3.797872                                       | -0.258833      | 5.767670       | 3.809374                                       | -0.282792      | 5.759215       |
| H(10A) | 2.344158                                       | -2.460304      | 6.234871       | 2.374812                                       | -2.437619      | 6.318165       | 2.392422                                       | -2.413445      | 6.409269       |
| H(10B) | 3.257132                                       | -2.347947      | 4.712448       | 3.282247                                       | -2.359069      | 4.791045       | 3.250305                                       | -2.401473      | 4.851501       |

**Table 44S.** Cartesian coordinates for azaester derivative (X = H, R = Bu) with B-N distance constrained to 2.4 Å (*a*), 2.5 Å (*b*) and 2.6 Å (*c*).

| <i>Atom</i> | $d_{\text{B-N}} = 2.4 \text{ \AA} \text{ (a)}$ |              |              | $d_{\text{B-N}} = 2.5 \text{ \AA} \text{ (b)}$ |              |              | $d_{\text{B-N}} = 2.6 \text{ \AA} \text{ (c)}$ |              |              |
|-------------|------------------------------------------------|--------------|--------------|------------------------------------------------|--------------|--------------|------------------------------------------------|--------------|--------------|
|             | <i>x</i> / Å                                   | <i>y</i> / Å | <i>z</i> / Å | <i>x</i> / Å                                   | <i>y</i> / Å | <i>z</i> / Å | <i>x</i> / Å                                   | <i>y</i> / Å | <i>z</i> / Å |
| C(1)        | 1.201526                                       | 0.000000     | 2.133967     | 1.201791                                       | 0.000000     | 2.133321     | 1.202005                                       | 0.000000     | 2.132892     |
| C(2)        | 0.000000                                       | 0.000000     | 1.397987     | 0.000000                                       | 0.000000     | 1.397863     | 0.000000                                       | 0.000000     | 1.397794     |
| C(3)        | 0.000000                                       | 0.000000     | 0.000000     | 0.000000                                       | 0.000000     | 0.000000     | 0.000000                                       | 0.000000     | 0.000000     |
| C(4)        | 1.212190                                       | 0.003838     | -0.698974    | 1.212227                                       | -0.002310    | -0.698896    | 1.212204                                       | 0.001515     | -0.698897    |
| C(5)        | 2.419112                                       | 0.007955     | 0.009039     | 2.419307                                       | -0.004048    | 0.008850     | 2.419363                                       | 0.002463     | 0.008678     |
| C(6)        | 2.408484                                       | 0.005921     | 1.406971     | 2.408926                                       | -0.002228    | 1.406664     | 2.409249                                       | 0.001727     | 1.406426     |
| H(2)        | -0.948666                                      | 0.004968     | 1.935181     | -0.948562                                      | 0.007255     | 1.935132     | -0.948631                                      | 0.002715     | 1.934939     |
| H(3)        | -0.944025                                      | 0.002038     | -0.547353    | -0.944042                                      | 0.004378     | -0.547280    | -0.944100                                      | 0.001649     | -0.547158    |
| H(4)        | 1.216237                                       | 0.005800     | -1.790144    | 1.216204                                       | -0.001446    | -1.790069    | 1.216109                                       | 0.002636     | -1.790069    |
| H(5)        | 3.367206                                       | 0.016330     | -0.531168    | 3.367366                                       | -0.002741    | -0.531451    | 3.367376                                       | 0.006123     | -0.531658    |
| H(6)        | 3.353049                                       | 0.015565     | 1.951277     | 3.353535                                       | 0.003262     | 1.950878     | 3.353992                                       | 0.005601     | 1.950369     |
| B(1)        | 1.196049                                       | -0.030996    | 3.710788     | 1.196274                                       | -0.005506    | 3.709629     | 1.196459                                       | -0.015623    | 3.708494     |
| O(1)        | -0.050704                                      | 0.132113     | 4.317260     | -0.049269                                      | 0.144683     | 4.308914     | -0.048139                                      | 0.099362     | 4.306781     |
| O(2)        | 2.438083                                       | 0.137734     | 4.325686     | 2.438083                                       | 0.141885     | 4.317458     | 2.437405                                       | 0.095085     | 4.315307     |
| N(1)        | 1.197234                                       | -2.196797    | 4.744860     | 1.189204                                       | -2.174758    | 4.952325     | 1.187732                                       | -2.212643    | 5.098828     |
| C(7)        | -0.349365                                      | -0.460237    | 5.565269     | -0.342443                                      | -0.344792    | 5.603252     | -0.335737                                      | -0.326896    | 5.625928     |
| C(8)        | -0.041216                                      | -1.969738    | 5.485877     | -0.048204                                      | -1.857094    | 5.657055     | -0.049746                                      | -1.834963    | 5.768287     |
| C(9)        | 2.734027                                       | -0.456123    | 5.573653     | 2.722253                                       | -0.349714    | 5.613064     | 2.715717                                       | -0.333681    | 5.635658     |
| C(10)       | 2.432526                                       | -1.966610    | 5.489940     | 2.423881                                       | -1.861214    | 5.663576     | 2.423193                                       | -1.840751    | 5.774896     |
| C(11)       | 1.200052                                       | -3.394744    | 3.894890     | 1.188947                                       | -3.474099    | 4.268561     | 1.186283                                       | -3.557621    | 4.514513     |
| H(11A)      | 0.322178                                       | -3.329886    | 3.236554     | 0.310021                                       | -3.496547    | 3.608279     | 0.308293                                       | -3.628145    | 3.855805     |
| H(11B)      | 2.081375                                       | -3.328719    | 3.241260     | 2.070482                                       | -3.498758    | 3.611818     | 2.068958                                       | -3.632652    | 3.862546     |
| C(12)       | 1.199010                                       | -4.743551    | 4.629600     | 1.185643                                       | -4.716908    | 5.172392     | 1.179696                                       | -4.734032    | 5.503950     |
| H(11A)      | 2.077802                                       | -4.805118    | 5.290875     | 2.066719                                       | -4.695867    | 5.833081     | 2.057551                                       | -4.666159    | 6.165815     |
| H(11B)      | 0.312907                                       | -4.808798    | 5.280762     | 0.301819                                       | -4.694081    | 5.829343     | 0.292683                                       | -4.666038    | 6.153532     |
| C(13)       | 1.206647                                       | -5.933312    | 3.662943     | 1.186041                                       | -6.022113    | 4.368166     | 1.184351                                       | -6.092148    | 4.792924     |
| H(13A)      | 0.332191                                       | -5.864142    | 2.996553     | 0.306656                                       | -6.038467    | 3.704820     | 0.311672                                       | -6.152981    | 4.123191     |
| H(13B)      | 2.092882                                       | -5.865362    | 3.012184     | 2.067551                                       | -6.039797    | 3.707684     | 2.072390                                       | -6.157362    | 4.144135     |
| C(14)       | 1.199500                                       | -7.289532    | 4.374314     | 1.183624                                       | -7.274554    | 5.249620     | 1.170238                                       | -7.281061    | 5.758153     |
| H(14A)      | 2.082815                                       | -7.403973    | 5.019788     | 2.070796                                       | -7.303824    | 5.899288     | 2.048992                                       | -7.265287    | 6.419694     |
| H(14B)      | 1.203138                                       | -8.118233    | 3.652849     | 1.183275                                       | -8.190350    | 4.642452     | 1.177417                                       | -8.236466    | 5.215403     |
| H(14C)      | 0.306890                                       | -7.400971    | 5.007415     | 0.294924                                       | -7.301816    | 5.897286     | 0.273396                                       | -7.264543    | 6.394931     |
| H(7A)       | 0.197492                                       | 0.026095     | 6.385050     | 0.207518                                       | 0.208006     | 6.376569     | 0.215223                                       | 0.266642     | 6.366846     |
| H(7B)       | -1.420799                                      | -0.312447    | 5.758802     | -1.412492                                      | -0.175369    | 5.786143     | -1.405069                                      | -0.145557    | 5.801270     |
| H(8A)       | -0.020652                                      | -2.402780    | 6.502547     | -0.046830                                      | -2.193335    | 6.711285     | -0.064956                                      | -2.102733    | 6.843147     |
| H(8B)       | -0.851935                                      | -2.458036    | 4.931584     | -0.862493                                      | -2.381938    | 5.142269     | -0.865043                                      | -2.384107    | 5.280675     |
| H(9A)       | 2.181854                                       | 0.026097     | 6.392349     | 2.169093                                       | 0.203614     | 6.383750     | 2.162891                                       | 0.261173     | 6.374161     |
| H(9B)       | 3.804041                                       | -0.304303    | 5.771915     | 3.791617                                       | -0.183186    | 5.802518     | 3.784739                                       | -0.156719    | 5.817247     |
| H(10A)      | 2.410938                                       | -2.401989    | 6.505617     | 2.416441                                       | -2.198679    | 6.717400     | 2.431986                                       | -2.109617    | 6.849576     |
| H(10B)      | 3.246785                                       | -2.450271    | 4.936732     | 3.239337                                       | -2.387558    | 5.152161     | 3.238713                                       | -2.392619    | 5.290710     |

**Table 45S.** Cartesian coordinates for azaester derivative (X = H, R = Bu) with B-N distance constrained to 2.7 Å (*a*), 2.8 Å (*b*) and 2.9 Å (*c*).

| <i>Atom</i> | $d_{\text{B-N}} = 2.7 \text{ \AA} \text{ (a)}$ |              |              | $d_{\text{B-N}} = 2.8 \text{ \AA} \text{ (b)}$ |              |              | $d_{\text{B-N}} = 2.9 \text{ \AA} \text{ (c)}$ |              |              |
|-------------|------------------------------------------------|--------------|--------------|------------------------------------------------|--------------|--------------|------------------------------------------------|--------------|--------------|
|             | <i>x</i> / Å                                   | <i>y</i> / Å | <i>z</i> / Å | <i>x</i> / Å                                   | <i>y</i> / Å | <i>z</i> / Å | <i>x</i> / Å                                   | <i>y</i> / Å | <i>z</i> / Å |
| C(1)        | 1.201526                                       | 0.000000     | 2.133967     | 1.201791                                       | 0.000000     | 2.133321     | 1.202005                                       | 0.000000     | 2.132892     |
| C(2)        | 0.000000                                       | 0.000000     | 1.397987     | 0.000000                                       | 0.000000     | 1.397863     | 0.000000                                       | 0.000000     | 1.397794     |
| C(3)        | 0.000000                                       | 0.000000     | 0.000000     | 0.000000                                       | 0.000000     | 0.000000     | 0.000000                                       | 0.000000     | 0.000000     |
| C(4)        | 1.212190                                       | 0.003838     | -0.698974    | 1.212227                                       | -0.002310    | -0.698896    | 1.212204                                       | 0.001515     | -0.698897    |
| C(5)        | 2.419112                                       | 0.007955     | 0.009039     | 2.419307                                       | -0.004048    | 0.008850     | 2.419363                                       | 0.002463     | 0.008678     |
| C(6)        | 2.408484                                       | 0.005921     | 1.406971     | 2.408926                                       | -0.002228    | 1.406664     | 2.409249                                       | 0.001727     | 1.406426     |
| H(2)        | -0.948666                                      | 0.004968     | 1.935181     | -0.948562                                      | 0.007255     | 1.935132     | -0.948631                                      | 0.002715     | 1.934939     |
| H(3)        | -0.944025                                      | 0.002038     | -0.547353    | -0.944042                                      | 0.004378     | -0.547280    | -0.944100                                      | 0.001649     | -0.547158    |
| H(4)        | 1.216237                                       | 0.005800     | -1.790144    | 1.216204                                       | -0.001446    | -1.790069    | 1.216109                                       | 0.002636     | -1.790069    |
| H(5)        | 3.367206                                       | 0.016330     | -0.531168    | 3.367366                                       | -0.002741    | -0.531451    | 3.367376                                       | 0.006123     | -0.531658    |
| H(6)        | 3.353049                                       | 0.015565     | 1.951277     | 3.353535                                       | 0.003262     | 1.950878     | 3.353992                                       | 0.005601     | 1.950369     |
| B(1)        | 1.196049                                       | -0.030996    | 3.710788     | 1.196274                                       | -0.005506    | 3.709629     | 1.196459                                       | -0.015623    | 3.708494     |
| O(1)        | -0.050704                                      | 0.132113     | 4.317260     | -0.049269                                      | 0.144683     | 4.308914     | -0.048139                                      | 0.099362     | 4.306781     |
| O(2)        | 2.438083                                       | 0.137734     | 4.325686     | 2.438083                                       | 0.141885     | 4.317458     | 2.437405                                       | 0.095085     | 4.315307     |
| N(1)        | 1.197234                                       | -2.196797    | 4.744860     | 1.189204                                       | -2.174758    | 4.952325     | 1.187732                                       | -2.212643    | 5.098828     |
| C(7)        | -0.349365                                      | -0.460237    | 5.565269     | -0.342443                                      | -0.344792    | 5.603252     | -0.335737                                      | -0.326896    | 5.625928     |
| C(8)        | -0.041216                                      | -1.969738    | 5.485877     | -0.048204                                      | -1.857094    | 5.657055     | -0.049746                                      | -1.834963    | 5.768287     |
| C(9)        | 2.734027                                       | -0.456123    | 5.573653     | 2.722253                                       | -0.349714    | 5.613064     | 2.715717                                       | -0.333681    | 5.635658     |
| C(10)       | 2.432526                                       | -1.966610    | 5.489940     | 2.423881                                       | -1.861214    | 5.663576     | 2.423193                                       | -1.840751    | 5.774896     |
| C(11)       | 1.200052                                       | -3.394744    | 3.894890     | 1.188947                                       | -3.474099    | 4.268561     | 1.186283                                       | -3.557621    | 4.514513     |
| H(11A)      | 0.322178                                       | -3.329886    | 3.236554     | 0.310021                                       | -3.496547    | 3.608279     | 0.308293                                       | -3.628145    | 3.855805     |
| H(11B)      | 2.081375                                       | -3.328719    | 3.241260     | 2.070482                                       | -3.498758    | 3.611818     | 2.068958                                       | -3.632652    | 3.862546     |
| C(12)       | 1.199010                                       | -4.743551    | 4.629600     | 1.185643                                       | -4.716908    | 5.172392     | 1.179696                                       | -4.734032    | 5.503950     |
| H(11A)      | 2.077802                                       | -4.805118    | 5.290875     | 2.066719                                       | -4.695867    | 5.833081     | 2.057551                                       | -4.666159    | 6.165815     |
| H(11B)      | 0.312907                                       | -4.808798    | 5.280762     | 0.301819                                       | -4.694081    | 5.829343     | 0.292683                                       | -4.666038    | 6.153532     |
| C(13)       | 1.206647                                       | -5.933312    | 3.662943     | 1.186041                                       | -6.022113    | 4.368166     | 1.184351                                       | -6.092148    | 4.792924     |
| H(13A)      | 0.332191                                       | -5.864142    | 2.996553     | 0.306656                                       | -6.038467    | 3.704820     | 0.311672                                       | -6.152981    | 4.123191     |
| H(13B)      | 2.092882                                       | -5.865362    | 3.012184     | 2.067551                                       | -6.039797    | 3.707684     | 2.072390                                       | -6.157362    | 4.144135     |
| C(14)       | 1.199500                                       | -7.289532    | 4.374314     | 1.183624                                       | -7.274554    | 5.249620     | 1.170238                                       | -7.281061    | 5.758153     |
| H(14A)      | 2.082815                                       | -7.403973    | 5.019788     | 2.070796                                       | -7.303824    | 5.899288     | 2.048992                                       | -7.265287    | 6.419694     |
| H(14B)      | 1.203138                                       | -8.118233    | 3.652849     | 1.183275                                       | -8.190350    | 4.642452     | 1.177417                                       | -8.236466    | 5.215403     |
| H(14C)      | 0.306890                                       | -7.400971    | 5.007415     | 0.294924                                       | -7.301816    | 5.897286     | 0.273396                                       | -7.264543    | 6.394931     |
| H(7A)       | 0.197492                                       | 0.026095     | 6.385050     | 0.207518                                       | 0.208006     | 6.376569     | 0.215223                                       | 0.266642     | 6.366846     |
| H(7B)       | -1.420799                                      | -0.312447    | 5.758802     | -1.412492                                      | -0.175369    | 5.786143     | -1.405069                                      | -0.145557    | 5.801270     |
| H(8A)       | -0.020652                                      | -2.402780    | 6.502547     | -0.046830                                      | -2.193335    | 6.711285     | -0.064956                                      | -2.102733    | 6.843147     |
| H(8B)       | -0.851935                                      | -2.458036    | 4.931584     | -0.862493                                      | -2.381938    | 5.142269     | -0.865043                                      | -2.384107    | 5.280675     |
| H(9A)       | 2.181854                                       | 0.026097     | 6.392349     | 2.169093                                       | 0.203614     | 6.383750     | 2.162891                                       | 0.261173     | 6.374161     |
| H(9B)       | 3.804041                                       | -0.304303    | 5.771915     | 3.791617                                       | -0.183186    | 5.802518     | 3.784739                                       | -0.156719    | 5.817247     |
| H(10A)      | 2.410938                                       | -2.401989    | 6.505617     | 2.416441                                       | -2.198679    | 6.717400     | 2.431986                                       | -2.109617    | 6.849576     |
| H(10B)      | 3.246785                                       | -2.450271    | 4.936732     | 3.239337                                       | -2.387558    | 5.152161     | 3.238713                                       | -2.392619    | 5.290710     |

**Table 46S.** Cartesian coordinates for azaester derivative (X = H, R = Bu) with B-N distance constrained to 3.0 Å (a), 3.1 Å (b) and 3.2 Å (c).

| Atom   | $d_{\text{B-N}} = 3.0 \text{ \AA} \text{ (a)}$ |                |                | $d_{\text{B-N}} = 3.1 \text{ \AA} \text{ (b)}$ |                |                | $d_{\text{B-N}} = 3.2 \text{ \AA} \text{ (c)}$ |                |                |
|--------|------------------------------------------------|----------------|----------------|------------------------------------------------|----------------|----------------|------------------------------------------------|----------------|----------------|
|        | $x / \text{Å}$                                 | $y / \text{Å}$ | $z / \text{Å}$ | $x / \text{Å}$                                 | $y / \text{Å}$ | $z / \text{Å}$ | $x / \text{Å}$                                 | $y / \text{Å}$ | $z / \text{Å}$ |
| C(1)   | 1.201844                                       | 0.000000       | 2.132286       | 1.203246                                       | 0.000000       | 2.130365       | 1.203536                                       | 0.000000       | 2.129843       |
| C(2)   | 0.000000                                       | 0.000000       | 1.397502       | 0.000000                                       | 0.000000       | 1.397577       | 0.000000                                       | 0.000000       | 1.397525       |
| C(3)   | 0.000000                                       | 0.000000       | 0.000000       | 0.000000                                       | 0.000000       | 0.000000       | 0.000000                                       | 0.000000       | 0.000000       |
| C(4)   | 1.213107                                       | -0.004248      | -0.697515      | 1.212155                                       | -0.003461      | -0.698934      | 1.212262                                       | 0.002443       | -0.698774      |
| C(5)   | 2.420085                                       | -0.009971      | 0.010556       | 2.419922                                       | -0.006715      | 0.007558       | 2.420192                                       | 0.004066       | 0.007483       |
| C(6)   | 2.410207                                       | -0.009501      | 1.408265       | 2.411028                                       | -0.004242      | 1.405092       | 2.411545                                       | 0.002800       | 1.404965       |
| H(2)   | -0.948742                                      | 0.005857       | 1.934358       | -0.948321                                      | 0.002303       | 1.935262       | -0.948194                                      | -0.003054      | 1.935470       |
| H(3)   | -0.943850                                      | 0.002313       | -0.547378      | -0.944204                                      | 0.002071       | -0.546829      | -0.944146                                      | -0.001061      | -0.546891      |
| H(4)   | 1.218143                                       | -0.003515      | -1.788650      | 1.215548                                       | -0.003565      | -1.790053      | 1.215614                                       | 0.002874       | -1.789888      |
| H(5)   | 3.368212                                       | -0.014052      | -0.529478      | 3.367551                                       | -0.009782      | -0.533296      | 3.367702                                       | 0.006065       | -0.533546      |
| H(6)   | 3.354826                                       | -0.015140      | 1.952503       | 3.355950                                       | -0.005159      | 1.948728       | 3.356374                                       | 0.002101       | 1.948769       |
| B(1)   | 1.190043                                       | 0.008056       | 3.705064       | 1.198721                                       | 0.015226       | 3.702028       | 1.198677                                       | -0.005512      | 3.699991       |
| O(1)   | -0.043215                                      | 0.151237       | 4.300601       | -0.034673                                      | 0.036501       | 4.313336       | -0.031425                                      | -0.017534      | 4.319522       |
| O(2)   | 2.416299                                       | -0.067797      | 4.326966       | 2.428894                                       | 0.037061       | 4.319946       | 2.425496                                       | -0.006559      | 4.326469       |
| N(1)   | 0.979677                                       | -2.041267      | 5.885894       | 1.191125                                       | -1.964184      | 6.087793       | 1.200564                                       | -1.982116      | 6.216543       |
| C(7)   | -0.330866                                      | 0.102875       | 5.692067       | -0.301780                                      | 0.047119       | 5.711754       | -0.293593                                      | 0.022913       | 5.720325       |
| C(8)   | -0.205557                                      | -1.308305      | 6.296051       | -0.056600                                      | -1.298674      | 6.420213       | -0.052756                                      | -1.297038      | 6.481246       |
| C(9)   | 2.658961                                       | -0.167670      | 5.724956       | 2.686511                                       | 0.047771       | 5.720148       | 2.684059                                       | 0.031813       | 5.727942       |
| C(10)  | 2.269707                                       | -1.534278      | 6.320923       | 2.437063                                       | -1.298151      | 6.426511       | 2.448660                                       | -1.290228      | 6.487492       |
| C(11)  | 0.845620                                       | -3.496606      | 5.963682       | 1.192277                                       | -3.406165      | 6.328690       | 1.202835                                       | -3.398488      | 6.574130       |
| H(11A) | -0.056786                                      | -3.775829      | 5.398932       | 0.307792                                       | -3.825767      | 5.825494       | 0.326105                                       | -3.862582      | 6.096627       |
| H(11B) | 1.698572                                       | -3.936088      | 5.424848       | 2.071025                                       | -3.826165      | 5.815704       | 2.089882                                       | -3.856253      | 6.109889       |
| C(12)  | 0.767564                                       | -4.107325      | 7.374103       | 1.200177                                       | -3.863922      | 7.798501       | 1.192546                                       | -3.731936      | 8.077326       |
| H(11A) | 1.669532                                       | -3.837386      | 7.945664       | 2.085291                                       | -3.454533      | 8.310394       | 2.069301                                       | -3.277298      | 8.564870       |
| H(11B) | -0.087669                                      | -3.675397      | 7.917334       | 0.320097                                       | -3.455344      | 8.319696       | 0.304402                                       | -3.284064      | 8.550277       |
| C(13)  | 0.627291                                       | -5.633503      | 7.342621       | 1.201808                                       | -5.391019      | 7.930057       | 1.195908                                       | -5.242316      | 8.339578       |
| H(13A) | -0.271178                                      | -5.902847      | 6.764433       | 0.315720                                       | -5.799138      | 7.417859       | 0.325514                                       | -5.698577      | 7.841168       |
| H(13B) | 1.482303                                       | -6.064426      | 6.797409       | 2.076636                                       | -5.798941      | 7.398665       | 2.086494                                       | -5.689433      | 7.869363       |
| C(14)  | 0.542958                                       | -6.262331      | 8.736540       | 1.217681                                       | -5.874584      | 9.383262       | 1.174184                                       | -5.598061      | 9.828987       |
| H(14A) | 1.442841                                       | -6.037499      | 9.327935       | 2.112928                                       | -5.514101      | 9.911195       | 2.051062                                       | -5.183849      | 10.348232      |
| H(14B) | 0.446309                                       | -7.355347      | 8.677166       | 1.215236                                       | -6.972029      | 9.439978       | 1.178987                                       | -6.686450      | 9.980569       |
| H(14C) | -0.325483                                      | -5.879173      | 9.292448       | 0.337354                                       | -5.509101      | 9.932464       | 0.275554                                       | -5.195656      | 10.319500      |
| H(7A)  | 0.274539                                       | 0.834672       | 6.238980       | 0.239795                                       | 0.864591       | 6.200617       | 0.243570                                       | 0.856800       | 6.185194       |
| H(7B)  | -1.377196                                      | 0.419683       | 5.802973       | -1.371061                                      | 0.277802       | 5.816861       | -1.363688                                      | 0.252426       | 5.820460       |
| H(8A)  | -0.297234                                      | -1.193155      | 7.397947       | -0.178325                                      | -1.099852      | 7.508103       | -0.205001                                      | -1.048766      | 7.555794       |
| H(8B)  | -1.070714                                      | -1.896875      | 5.962551       | -0.863393                                      | -1.985750      | 6.130883       | -0.852587                                      | -1.997874      | 6.204485       |
| H(9A)  | 2.181734                                       | 0.660357       | 6.261491       | 2.141445                                       | 0.865096       | 6.205366       | 2.141561                                       | 0.861872       | 6.193544       |
| H(9B)  | 3.742310                                       | -0.043311      | 5.860244       | 3.755001                                       | 0.278702       | 5.832558       | 3.752703                                       | 0.266801       | 5.830883       |
| H(10A) | 2.360150                                       | -1.439076      | 7.425123       | 2.553006                                       | -1.099712      | 7.515059       | 2.594679                                       | -1.041194      | 7.562838       |
| H(10B) | 3.020791                                       | -2.268958      | 6.001158       | 3.245430                                       | -1.985128      | 6.141328       | 3.253609                                       | -1.986442      | 6.214142       |

**Table 47S.** Cartesian coordinates for azaester derivative (X = H, R = Bu) with B-N distance constrained to 3.3 Å.

| <i>Atom</i> | $d_{\text{B-N}} = 3.3 \text{ \AA} (a)$ |                |                |
|-------------|----------------------------------------|----------------|----------------|
|             | $x / \text{Å}$                         | $y / \text{Å}$ | $z / \text{Å}$ |
| C(1)        | 1.204378                               | 0.000000       | 2.128969       |
| C(2)        | 0.000000                               | 0.000000       | 1.397580       |
| C(3)        | 0.000000                               | 0.000000       | 0.000000       |
| C(4)        | 1.212103                               | 0.004439       | -0.699039      |
| C(5)        | 2.420287                               | 0.009896       | 0.006645       |
| C(6)        | 2.412160                               | 0.009804       | 1.403971       |
| H(2)        | -0.947965                              | -0.005454      | 1.935988       |
| H(3)        | -0.944170                              | -0.002020      | -0.546722      |
| H(4)        | 1.215332                               | 0.004820       | -1.790134      |
| H(5)        | 3.367532                               | 0.014619       | -0.534761      |
| H(6)        | 3.357143                               | 0.014877       | 1.947566       |
| B(1)        | 1.199621                               | 0.008868       | 3.697760       |
| O(1)        | -0.018447                              | -0.088871      | 4.334241       |
| O(2)        | 2.423527                               | 0.084852       | 4.326901       |
| N(1)        | 1.337836                               | -1.849602      | 6.421174       |
| C(7)        | -0.275191                              | 0.022041       | 5.734902       |
| C(8)        | 0.043071                               | -1.218924      | 6.599383       |
| C(9)        | 2.686981                               | 0.213824       | 5.722804       |
| C(10)       | 2.547216                               | -1.063419      | 6.579923       |
| C(11)       | 1.431745                               | -3.219333      | 6.914004       |
| H(11A)      | 0.571016                               | -3.776714      | 6.513200       |
| H(11B)      | 2.331828                               | -3.672343      | 6.469701       |
| C(12)       | 1.479596                               | -3.400883      | 8.442846       |
| H(11A)      | 2.343440                               | -2.854377      | 8.852673       |
| H(11B)      | 0.581997                               | -2.952992      | 8.897430       |
| C(13)       | 1.574840                               | -4.875079      | 8.849484       |
| H(13A)      | 0.699015                               | -5.416226      | 8.456813       |
| H(13B)      | 2.455316                               | -5.326915      | 8.364752       |
| C(14)       | 1.664890                               | -5.083475      | 10.364134      |
| H(14A)      | 2.550164                               | -4.581167      | 10.781355      |
| H(14B)      | 1.735327                               | -6.150415      | 10.617763      |
| H(14C)      | 0.779532                               | -4.676305      | 10.874564      |
| H(7A)       | 0.202609                               | 0.921231       | 6.138267       |
| H(7B)       | -1.358214                              | 0.183925       | 5.825770       |
| H(8A)       | -0.151910                              | -0.891201      | 7.646325       |
| H(8B)       | -0.708804                              | -1.986998      | 6.369422       |
| H(9A)       | 2.098142                               | 1.035148       | 6.145581       |
| H(9B)       | 3.739532                               | 0.519706       | 5.800879       |
| H(10A)      | 2.716272                               | -0.715246      | 7.624736       |
| H(10B)      | 3.385785                               | -1.730882      | 6.335659       |

**Table 48S.** Cartesian coordinates for azaester derivative (X = H, R = H) with B-N distance constrained to 1.5 Å (*a*), 1.6 Å (*b*) and 1.7 Å (*c*).

| Atom   | $d_{\text{B-N}} = 1.5 \text{ \AA} \text{ (a)}$ |                   |                   | $d_{\text{B-N}} = 1.6 \text{ \AA} \text{ (b)}$ |                   |                   | $d_{\text{B-N}} = 1.7 \text{ \AA} \text{ (c)}$ |                   |                   |
|--------|------------------------------------------------|-------------------|-------------------|------------------------------------------------|-------------------|-------------------|------------------------------------------------|-------------------|-------------------|
|        | $x / \text{ \AA}$                              | $y / \text{ \AA}$ | $z / \text{ \AA}$ | $x / \text{ \AA}$                              | $y / \text{ \AA}$ | $z / \text{ \AA}$ | $x / \text{ \AA}$                              | $y / \text{ \AA}$ | $z / \text{ \AA}$ |
| C(1)   | 1.196789                                       | 0.000000          | 2.139632          | 1.199383                                       | 0.000000          | 2.139079          | 1.199640                                       | 0.000000          | 2.137987          |
| C(2)   | 0.000000                                       | 0.000000          | 1.400077          | 0.000000                                       | 0.000000          | 1.399264          | 0.000000                                       | 0.000000          | 1.399321          |
| C(3)   | 0.000000                                       | 0.000000          | 0.000000          | 0.000000                                       | 0.000000          | 0.000000          | 0.000000                                       | 0.000000          | 0.000000          |
| C(4)   | 1.210629                                       | -0.004992         | -0.700170         | 1.211518                                       | -0.005273         | -0.699974         | 1.210998                                       | 0.006766          | -0.700645         |
| C(5)   | 2.416026                                       | -0.001501         | 0.010432          | 2.416117                                       | -0.004456         | 0.010521          | 2.416259                                       | 0.018640          | 0.008994          |
| C(6)   | 2.402330                                       | 0.003221          | 1.409691          | 2.403337                                       | -0.000969         | 1.410277          | 2.403850                                       | 0.015755          | 1.408448          |
| H(2)   | -0.949989                                      | 0.028910          | 1.935880          | -0.952252                                      | 0.034024          | 1.931881          | -0.950533                                      | 0.015962          | 1.934784          |
| H(3)   | -0.944651                                      | 0.011642          | -0.546822         | -0.944474                                      | 0.013935          | -0.547104         | -0.944744                                      | 0.005106          | -0.546759         |
| H(4)   | 1.215575                                       | -0.002284         | -1.791269         | 1.216063                                       | -0.000572         | -1.791087         | 1.214863                                       | 0.011073          | -1.791780         |
| H(5)   | 3.365562                                       | 0.010240          | -0.527899         | 3.365599                                       | 0.004886          | -0.527865         | 3.365291                                       | 0.038689          | -0.529862         |
| H(6)   | 3.351116                                       | 0.041014          | 1.949274          | 3.348853                                       | 0.029010          | 1.953835          | 3.349789                                       | 0.048865          | 1.951192          |
| B(1)   | 1.200229                                       | -0.041607         | 3.756166          | 1.187732                                       | -0.028824         | 3.749262          | 1.195604                                       | -0.073754         | 3.741188          |
| O(1)   | -0.133776                                      | 0.284087          | 4.349612          | 0.027716                                       | 0.669619          | 4.303071          | -0.040242                                      | 0.418475          | 4.331012          |
| O(2)   | 2.304258                                       | 0.758923          | 4.306781          | 2.490991                                       | 0.335212          | 4.354726          | 2.453841                                       | 0.366259          | 4.355183          |
| N(1)   | 1.463498                                       | -1.412532         | 4.305031          | 0.984225                                       | -1.502869         | 4.337290          | 1.161134                                       | -1.681546         | 4.292382          |
| H(1)   | 1.928821                                       | -1.991636         | 3.608674          | 0.625092                                       | -2.124129         | 3.616535          | 0.985060                                       | -2.313950         | 3.516882          |
| C(7)   | 0.124210                                       | -2.011340         | 4.627935          | -0.039381                                      | -1.366487         | 5.439397          | 0.020035                                       | -1.725292         | 5.263296          |
| C(8)   | -0.653531                                      | -0.778325         | 5.106119          | -0.220815                                      | 0.158276          | 5.589041          | -0.306489                                      | -0.244296         | 5.541473          |
| C(9)   | 2.395651                                       | -1.241748         | 5.494587          | 2.343449                                       | -1.957732         | 4.765479          | 2.521687                                       | -1.918356         | 4.853426          |
| C(10)  | 2.539856                                       | 0.289991          | 5.611776          | 3.004906                                       | -0.648588         | 5.214589          | 2.971028                                       | -0.523534         | 5.311054          |
| H(7A)  | 0.217922                                       | -2.831143         | 5.349349          | 0.303842                                       | -1.878067         | 6.346040          | 0.286054                                       | -2.305833         | 6.155204          |
| H(7B)  | -0.290734                                      | -2.392685         | 3.688115          | -0.966875                                      | -1.835226         | 5.093300          | -0.825213                                      | -2.209161         | 4.761324          |
| H(8A)  | -0.508862                                      | -0.617879         | 6.192619          | 0.483218                                       | 0.565938          | 6.335902          | 0.308443                                       | 0.147148          | 6.371283          |
| H(8B)  | -1.733797                                      | -0.901664         | 4.931507          | -1.242335                                      | 0.409527          | 5.906879          | -1.363285                                      | -0.116118         | 5.815243          |
| H(9A)  | 1.972517                                       | -1.733445         | 6.377276          | 2.282766                                       | -2.740540         | 5.531100          | 2.506850                                       | -2.679171         | 5.644107          |
| H(9B)  | 3.349245                                       | -1.716926         | 5.241698          | 2.845205                                       | -2.355241         | 3.875735          | 3.155916                                       | -2.264885         | 4.029371          |
| H(10A) | 1.807379                                       | 0.696265          | 6.331287          | 2.769263                                       | -0.432217         | 6.274773          | 2.597244                                       | -0.304036         | 6.328950          |
| H(10B) | 3.547770                                       | 0.574881          | 5.944274          | 4.100442                                       | -0.711047         | 5.126680          | 4.068717                                       | -0.454448         | 5.340515          |

**Table 49S.** Cartesian coordinates for azaester derivative (X = H, R = H) with B-N distance constrained to 1.8 Å (*a*), 1.9 Å (*b*) and 2.0 Å (*c*).

| Atom   | $d_{\text{B-N}} = 1.8 \text{ \AA} \text{ (a)}$ |                   |                   | $d_{\text{B-N}} = 1.9 \text{ \AA} \text{ (b)}$ |                   |                   | $d_{\text{B-N}} = 2.0 \text{ \AA} \text{ (c)}$ |                   |                   |
|--------|------------------------------------------------|-------------------|-------------------|------------------------------------------------|-------------------|-------------------|------------------------------------------------|-------------------|-------------------|
|        | $x / \text{ \AA}$                              | $y / \text{ \AA}$ | $z / \text{ \AA}$ | $x / \text{ \AA}$                              | $y / \text{ \AA}$ | $z / \text{ \AA}$ | $x / \text{ \AA}$                              | $y / \text{ \AA}$ | $z / \text{ \AA}$ |
| C(1)   | 1.199949                                       | 0.000000          | 2.137135          | 1.200056                                       | 0.000000          | 2.136669          | 1.199786                                       | 0.000000          | 2.136732          |
| C(2)   | 0.000000                                       | 0.000000          | 1.399166          | 0.000000                                       | 0.000000          | 1.398947          | 0.000000                                       | 0.000000          | 1.398698          |
| C(3)   | 0.000000                                       | 0.000000          | 0.000000          | 0.000000                                       | 0.000000          | 0.000000          | 0.000000                                       | 0.000000          | 0.000000          |
| C(4)   | 1.211082                                       | 0.007769          | -0.700496         | 1.211363                                       | 0.008968          | -0.700074         | 1.211932                                       | 0.003168          | -0.699176         |
| C(5)   | 2.416679                                       | 0.019566          | 0.008807          | 2.417136                                       | 0.020914          | 0.009164          | 2.417752                                       | 0.009815          | 0.010409          |
| C(6)   | 2.404607                                       | 0.015734          | 1.408015          | 2.405221                                       | 0.016192          | 1.408111          | 2.405794                                       | 0.008328          | 1.409083          |
| H(2)   | -0.950085                                      | 0.013026          | 1.935149          | -0.949892                                      | 0.010182          | 1.935074          | -0.949804                                      | 0.013572          | 1.934639          |
| H(3)   | -0.944648                                      | 0.003974          | -0.546863         | -0.944511                                      | 0.002622          | -0.547009         | -0.944268                                      | 0.004607          | -0.547291         |
| H(4)   | 1.214875                                       | 0.012028          | -1.791644         | 1.215348                                       | 0.013073          | -1.791233         | 1.216629                                       | 0.006117          | -1.790352         |
| H(5)   | 3.365534                                       | 0.039069          | -0.530315         | 3.365903                                       | 0.039998          | -0.530050         | 3.366630                                       | 0.022167          | -0.528725         |
| H(6)   | 3.350191                                       | 0.044622          | 1.951270          | 3.350453                                       | 0.041044          | 1.951889          | 3.350847                                       | 0.028147          | 1.953152          |
| B(1)   | 1.196714                                       | -0.073909         | 3.734361          | 1.196304                                       | -0.069417         | 3.728429          | 1.192591                                       | -0.045013         | 3.724453          |
| O(1)   | -0.047686                                      | 0.349222          | 4.337222          | -0.050579                                      | 0.298178          | 4.339828          | -0.057190                                      | 0.284209          | 4.332625          |
| O(2)   | 2.448897                                       | 0.330813          | 4.353079          | 2.445571                                       | 0.290186          | 4.350906          | 2.438643                                       | 0.279380          | 4.343577          |
| N(1)   | 1.182601                                       | -1.780372         | 4.306888          | 1.188517                                       | -1.870039         | 4.334811          | 1.185578                                       | -1.921722         | 4.415765          |
| H(1)   | 1.075148                                       | -2.419758         | 3.525871          | 1.124422                                       | -2.524966         | 3.563211          | 1.183435                                       | -2.619511         | 3.681071          |
| C(7)   | -0.006452                                      | -1.833397         | 5.202379          | -0.029484                                      | -1.906280         | 5.177155          | -0.075661                                      | -1.926454         | 5.178670          |
| C(8)   | -0.344127                                      | -0.360999         | 5.513768          | -0.367243                                      | -0.435424         | 5.497673          | -0.414923                                      | -0.452332         | 5.477459          |
| C(9)   | 2.513670                                       | -1.940760         | 4.944190          | 2.494000                                       | -1.969396         | 5.021683          | 2.446404                                       | -1.934727         | 5.179041          |
| C(10)  | 2.910287                                       | -0.518963         | 5.373207          | 2.861467                                       | -0.528029         | 5.416809          | 2.788264                                       | -0.463651         | 5.486908          |
| H(7A)  | 0.192705                                       | -2.440624         | 6.095118          | 0.116024                                       | -2.521589         | 6.076068          | -0.005652                                      | -2.534468         | 6.093129          |
| H(7B)  | -0.827405                                      | -2.290570         | 4.638209          | -0.835234                                      | -2.344483         | 4.576639          | -0.851279                                      | -2.353545         | 4.531702          |
| H(8A)  | 0.239717                                       | 0.005369          | 6.376196          | 0.196540                                       | -0.081359         | 6.377637          | 0.114264                                       | -0.097701         | 6.377786          |
| H(8B)  | -1.409660                                      | -0.244926         | 5.757645          | -1.437471                                      | -0.320237         | 5.720452          | -1.492337                                      | -0.331863         | 5.659131          |
| H(9A)  | 2.487604                                       | -2.665474         | 5.768940          | 2.459372                                       | -2.658197         | 5.877716          | 2.375038                                       | -2.548780         | 6.089391          |
| H(9B)  | 3.203801                                       | -2.300385         | 4.172056          | 3.220601                                       | -2.345263         | 4.291654          | 3.221156                                       | -2.358734         | 4.528999          |
| H(10A) | 2.469627                                       | -0.267199         | 6.355162          | 2.379097                                       | -0.245103         | 6.368992          | 2.254959                                       | -0.112151         | 6.386030          |
| H(10B) | 4.002322                                       | -0.428632         | 5.467875          | 3.947694                                       | -0.426035         | 5.553622          | 3.864944                                       | -0.346866         | 5.675237          |

**Table 50S.** Cartesian coordinates for azaester derivative (X = H, R = H) with B-N distance constrained to 2.1 Å (*a*), 2.2 Å (*b*) and 2.3 Å (*c*).

| Atom   | $d_{\text{B-N}} = 2.1 \text{ \AA} \text{ (a)}$ |                |                | $d_{\text{B-N}} = 2.2 \text{ \AA} \text{ (b)}$ |                |                | $d_{\text{B-N}} = 2.3 \text{ \AA} \text{ (c)}$ |                |                |
|--------|------------------------------------------------|----------------|----------------|------------------------------------------------|----------------|----------------|------------------------------------------------|----------------|----------------|
|        | $x / \text{Å}$                                 | $y / \text{Å}$ | $z / \text{Å}$ | $x / \text{Å}$                                 | $y / \text{Å}$ | $z / \text{Å}$ | $x / \text{Å}$                                 | $y / \text{Å}$ | $z / \text{Å}$ |
| C(1)   | 1.199261                                       | 0.000000       | 2.137639       | 1.200737                                       | 0.000000       | 2.135044       | 1.201157                                       | 0.000000       | 2.134315       |
| C(2)   | 0.000000                                       | 0.000000       | 1.398588       | 0.000000                                       | 0.000000       | 1.398271       | 0.000000                                       | 0.000000       | 1.398083       |
| C(3)   | 0.000000                                       | 0.000000       | 0.000000       | 0.000000                                       | 0.000000       | 0.000000       | 0.000000                                       | 0.000000       | 0.000000       |
| C(4)   | 1.206762                                       | 0.017574       | -0.696377      | 1.212084                                       | 0.002054       | -0.699053      | 1.212112                                       | 0.003046       | -0.699046      |
| C(5)   | 2.414126                                       | 0.020601       | 0.010854       | 2.418565                                       | 0.006710       | 0.009634       | 2.418830                                       | 0.007606       | 0.009250       |
| C(6)   | 2.404620                                       | 0.012411       | 1.409209       | 2.407289                                       | 0.005931       | 1.407835       | 2.407908                                       | 0.005649       | 1.407276       |
| H(2)   | -0.949514                                      | -0.001228      | 1.935002       | -0.949196                                      | 0.008491       | 1.934926       | -0.949019                                      | 0.005928       | 1.934926       |
| H(3)   | -0.944257                                      | 0.004153       | -0.547269      | -0.944187                                      | 0.003355       | -0.547292      | -0.944181                                      | 0.001986       | -0.547244      |
| H(4)   | 1.209502                                       | 0.025393       | -1.787544      | 1.216417                                       | 0.003877       | -1.790246      | 1.216251                                       | 0.004892       | -1.790240      |
| H(5)   | 3.361953                                       | 0.035047       | -0.529981      | 3.367067                                       | 0.015118       | -0.530085      | 3.367184                                       | 0.015538       | -0.530666      |
| H(6)   | 3.350089                                       | 0.028616       | 1.952508       | 3.352149                                       | 0.019515       | 1.952023       | 3.352705                                       | 0.015907       | 1.951439       |
| B(1)   | 1.288861                                       | -0.244434      | 3.334336       | 1.194878                                       | -0.030626      | 3.716030       | 1.195716                                       | -0.029314      | 3.712976       |
| O(1)   | 0.049958                                       | 0.169393       | 4.420712       | -0.056401                                      | 0.199086       | 4.324035       | -0.052367                                      | 0.171483       | 4.319722       |
| O(2)   | 2.539451                                       | 0.211252       | 4.285242       | 2.436647                                       | 0.223538       | 4.333445       | 2.439341                                       | 0.173138       | 4.328345       |
| N(1)   | 1.073207                                       | -1.987120      | 4.486091       | 1.211854                                       | -2.056349      | 4.574028       | 1.193740                                       | -2.117820      | 4.676375       |
| H(1)   | 1.091027                                       | -2.720330      | 3.788081       | 1.223888                                       | -2.833988      | 3.926611       | 1.193829                                       | -2.943351      | 4.091751       |
| C(7)   | -0.220166                                      | -1.911172      | 5.178500       | -0.048663                                      | -1.970864      | 5.314553       | -0.059711                                      | -1.960522      | 5.410598       |
| C(8)   | -0.223317                                      | -0.592344      | 5.574632       | -0.386644                                      | -0.479405      | 5.515143       | -0.374161                                      | -0.456268      | 5.542295       |
| C(9)   | 2.287016                                       | -1.925195      | 5.311114       | 2.461366                                       | -1.944107      | 5.329492       | 2.445624                                       | -1.962016      | 5.413352       |
| C(10)  | 2.928887                                       | -0.516095      | 5.425316       | 2.767867                                       | -0.445549      | 5.529572       | 2.757983                                       | -0.457758      | 5.550074       |
| H(7A)  | -0.233431                                      | -2.492360      | 6.114306       | -0.012438                                      | -2.501853      | 6.280653       | -0.038534                                      | -2.438383      | 6.405919       |
| H(7B)  | -0.979949                                      | -2.321822      | 4.502285       | -0.826811                                      | -2.433776      | 4.695045       | -0.850087                                      | -2.437912      | 4.817800       |
| H(8A)  | 0.349404                                       | -0.235867      | 6.446106       | 0.146568                                       | -0.062247      | 6.383631       | 0.169854                                       | -0.005045      | 6.385599       |
| H(8B)  | -1.290280                                      | -0.492938      | 5.819119       | -1.462630                                      | -0.353044      | 5.699537       | -1.446832                                      | -0.308939      | 5.729662       |
| H(9A)  | 2.183060                                       | -2.484321      | 6.254663       | 2.423440                                       | -2.472796      | 6.296765       | 2.423122                                       | -2.442736      | 6.407283       |
| H(9B)  | 3.104412                                       | -2.370375      | 4.731006       | 3.256119                                       | -2.393677      | 4.721360       | 3.237480                                       | -2.436878      | 4.820479       |
| H(10A) | 2.417239                                       | -0.160200      | 6.334039       | 2.217753                                       | -0.036765      | 6.391457       | 2.210740                                       | -0.009788      | 6.393071       |
| H(10B) | 4.008264                                       | -0.378138      | 5.580008       | 3.839189                                       | -0.297508      | 5.724685       | 3.829847                                       | -0.309537      | 5.741291       |



**Table S1S.** Cartesian coordinates for azaester derivative (X = H, R = H) with B-N distance constrained to 2.4 Å (*a*), 2.5 Å (*b*) and 2.6 Å (*c*).

| Atom   | $d_{\text{B-N}} = 2.4 \text{ \AA} \text{ (a)}$ |                |                | $d_{\text{B-N}} = 2.5 \text{ \AA} \text{ (b)}$ |                |                | $d_{\text{B-N}} = 2.6 \text{ \AA} \text{ (c)}$ |                |                |
|--------|------------------------------------------------|----------------|----------------|------------------------------------------------|----------------|----------------|------------------------------------------------|----------------|----------------|
|        | $x / \text{Å}$                                 | $y / \text{Å}$ | $z / \text{Å}$ | $x / \text{Å}$                                 | $y / \text{Å}$ | $z / \text{Å}$ | $x / \text{Å}$                                 | $y / \text{Å}$ | $z / \text{Å}$ |
| C(1)   | 1.201415                                       | 0.000000       | 2.133802       | 1.201683                                       | 0.000000       | 2.133280       | 1.201876                                       | 0.000000       | 2.132890       |
| C(2)   | 0.000000                                       | 0.000000       | 1.397937       | 0.000000                                       | 0.000000       | 1.397838       | 0.000000                                       | 0.000000       | 1.397783       |
| C(3)   | 0.000000                                       | 0.000000       | 0.000000       | 0.000000                                       | 0.000000       | 0.000000       | 0.000000                                       | 0.000000       | 0.000000       |
| C(4)   | 1.212234                                       | 0.002377       | -0.698868      | 1.212216                                       | 0.002494       | -0.698870      | 1.212209                                       | -0.002794      | -0.698838      |
| C(5)   | 2.419088                                       | 0.005868       | 0.009241       | 2.419211                                       | 0.005377       | 0.008979       | 2.419262                                       | -0.004672      | 0.008886       |
| C(6)   | 2.408374                                       | 0.004232       | 1.407131       | 2.408788                                       | 0.003176       | 1.406772       | 2.409105                                       | -0.003892      | 1.406621       |
| H(2)   | -0.948824                                      | 0.003676       | 1.934977       | -0.948735                                      | 0.001884       | 1.934959       | -0.948767                                      | 0.005251       | 1.934772       |
| H(3)   | -0.944139                                      | 0.001413       | -0.547254      | -0.944163                                      | 0.000522       | -0.547165      | -0.944192                                      | 0.002642       | -0.547062      |
| H(4)   | 1.216402                                       | 0.003620       | -1.790065      | 1.216256                                       | 0.003583       | -1.790066      | 1.216233                                       | -0.002481      | -1.790030      |
| H(5)   | 3.367374                                       | 0.011730       | -0.530759      | 3.367408                                       | 0.010082       | -0.531139      | 3.367430                                       | -0.005508      | -0.531265      |
| H(6)   | 3.353073                                       | 0.011441       | 1.951397       | 3.353503                                       | 0.007413       | 1.950922       | 3.353952                                       | -0.002306      | 1.950499       |
| B(1)   | 1.195208                                       | -0.026751      | 3.710839       | 1.195947                                       | -0.025380      | 3.709418       | 1.195658                                       | -0.003752      | 3.708889       |
| O(1)   | -0.053770                                      | 0.131423       | 4.313473       | -0.050995                                      | 0.108821       | 4.308883       | -0.049822                                      | 0.126075       | 4.301272       |
| O(2)   | 2.436997                                       | 0.147066       | 4.323568       | 2.438671                                       | 0.108003       | 4.317881       | 2.438678                                       | 0.100805       | 4.311239       |
| N(1)   | 1.204587                                       | -2.162764      | 4.805077       | 1.190300                                       | -2.191466      | 4.957632       | 1.168846                                       | -2.141666      | 5.188282       |
| H(1)   | 1.215549                                       | -3.039286      | 4.300544       | 1.191290                                       | -3.115209      | 4.545904       | 1.162356                                       | -3.113117      | 4.907087       |
| C(7)   | -0.053121                                      | -1.952704      | 5.513250       | -0.061523                                      | -1.903044      | 5.644890       | -0.081005                                      | -1.757212      | 5.828276       |
| C(8)   | -0.368360                                      | -0.444402      | 5.564866       | -0.358045                                      | -0.391128      | 5.595756       | -0.355378                                      | -0.254170      | 5.629916       |
| C(9)   | 2.448035                                       | -1.932334      | 5.532031       | 2.437634                                       | -1.904232      | 5.653493       | 2.417011                                       | -1.778437      | 5.843880       |
| C(10)  | 2.743040                                       | -0.419388      | 5.581308       | 2.735543                                       | -0.392539      | 5.607007       | 2.723513                                       | -0.281607      | 5.643858       |
| H(7A)  | -0.050913                                      | -2.370691      | 6.536770       | -0.071861                                      | -2.243110      | 6.698064       | -0.110271                                      | -1.985538      | 6.912038       |
| H(7B)  | -0.840154                                      | -2.458893      | 4.939840       | -0.857695                                      | -2.435670      | 5.108930       | -0.883313                                      | -2.327601      | 5.342222       |
| H(8A)  | 0.171625                                       | 0.051455       | 6.384435       | 0.189525                                       | 0.152571       | 6.378207       | 0.198654                                       | 0.355709       | 6.356110       |
| H(8B)  | -1.441630                                      | -0.292179      | 5.744263       | -1.428782                                      | -0.218250      | 5.771122       | -1.423597                                      | -0.053000      | 5.789497       |
| H(9A)  | 2.434849                                       | -2.345448      | 6.557408       | 2.440622                                       | -2.244813      | 6.706557       | 2.426867                                       | -2.003102      | 6.928738       |
| H(9B)  | 3.250878                                       | -2.430831      | 4.974026       | 3.237063                                       | -2.437118      | 5.122659       | 3.214571                                       | -2.366503      | 5.371257       |
| H(10A) | 2.186199                                       | 0.073001       | 6.391634       | 2.182394                                       | 0.151335       | 6.385415       | 2.175197                                       | 0.341902       | 6.362827       |
| H(10B) | 3.811863                                       | -0.252571      | 5.773723       | 3.805030                                       | -0.220450      | 5.790581       | 3.794061                                       | -0.101964      | 5.813191       |

**Table 52S.** Cartesian coordinates for azaester derivative (X = H, R = H) with B-N distance constrained to 2.7 Å (*a*), 2.8 Å (*b*) and 2.9 Å (*c*).

| Atom   | $d_{\text{B-N}} = 2.7 \text{ \AA} \text{ (a)}$ |                   |                   | $d_{\text{B-N}} = 2.8 \text{ \AA} \text{ (b)}$ |                   |                   | $d_{\text{B-N}} = 2.9 \text{ \AA} \text{ (c)}$ |                   |                   |
|--------|------------------------------------------------|-------------------|-------------------|------------------------------------------------|-------------------|-------------------|------------------------------------------------|-------------------|-------------------|
|        | $x / \text{ \AA}$                              | $y / \text{ \AA}$ | $z / \text{ \AA}$ | $x / \text{ \AA}$                              | $y / \text{ \AA}$ | $z / \text{ \AA}$ | $x / \text{ \AA}$                              | $y / \text{ \AA}$ | $z / \text{ \AA}$ |
| C(1)   | 1.202193                                       | 0.000000          | 2.132342          | 1.202402                                       | 0.000000          | 2.131902          | 1.204057                                       | 0.000000          | 2.129255          |
| C(2)   | 0.000000                                       | 0.000000          | 1.397732          | 0.000000                                       | 0.000000          | 1.397688          | 0.000000                                       | 0.000000          | 1.397802          |
| C(3)   | 0.000000                                       | 0.000000          | 0.000000          | 0.000000                                       | 0.000000          | 0.000000          | 0.000000                                       | 0.000000          | 0.000000          |
| C(4)   | 1.212078                                       | -0.004851         | -0.699008         | 1.212085                                       | -0.001155         | -0.698991         | 1.212491                                       | -0.002214         | -0.699652         |
| C(5)   | 2.419271                                       | -0.008328         | 0.008406          | 2.419373                                       | -0.002083         | 0.008262          | 2.420486                                       | -0.002760         | 0.006693          |
| C(6)   | 2.409429                                       | -0.005785         | 1.406090          | 2.409789                                       | -0.002123         | 1.405901          | 2.411457                                       | 0.000514          | 1.404324          |
| H(2)   | -0.948719                                      | 0.005600          | 1.934736          | -0.948694                                      | 0.001520          | 1.934783          | -0.948053                                      | -0.001427         | 1.935629          |
| H(3)   | -0.944256                                      | 0.003346          | -0.546908         | -0.944286                                      | 0.001012          | -0.546829         | -0.944213                                      | 0.001083          | -0.546701         |
| H(4)   | 1.215856                                       | -0.005048         | -1.790184         | 1.215807                                       | -0.000979         | -1.790158         | 1.215767                                       | -0.002482         | -1.790671         |
| H(5)   | 3.367334                                       | -0.011465         | -0.531869         | 3.367385                                       | -0.002688         | -0.532081         | 3.368016                                       | -0.004281         | -0.534162         |
| H(6)   | 3.354409                                       | -0.004649         | 1.949673          | 3.354812                                       | -0.002264         | 1.949380          | 3.356363                                       | 0.003559          | 1.948037          |
| B(1)   | 1.196878                                       | 0.008931          | 3.707740          | 1.197581                                       | -0.004971         | 3.706473          | 1.196799                                       | -0.015129         | 3.690706          |
| O(1)   | -0.047768                                      | 0.107126          | 4.299900          | -0.044782                                      | 0.065888          | 4.302635          | -0.047126                                      | -0.032457         | 4.303480          |
| O(2)   | 2.438035                                       | 0.104849          | 4.307748          | 2.437667                                       | 0.053425          | 4.308622          | 2.422752                                       | 0.109540          | 4.327097          |
| N(1)   | 1.189353                                       | -2.100803         | 5.392663          | 1.185106                                       | -2.112462         | 5.549927          | 1.292670                                       | -2.070402         | 5.734394          |
| H(1)   | 1.188667                                       | -3.100712         | 5.239566          | 1.183567                                       | -3.122452         | 5.493405          | 1.356928                                       | -3.078801         | 5.790465          |
| C(7)   | -0.061161                                      | -1.652832         | 5.986313          | -0.067329                                      | -1.610116         | 6.091306          | -0.001662                                      | -1.601422         | 6.201705          |
| C(8)   | -0.342042                                      | -0.174642         | 5.657032          | -0.335213                                      | -0.152246         | 5.674268          | -0.332079                                      | -0.185077         | 5.687429          |
| C(9)   | 2.437572                                       | -1.655691         | 5.993363          | 2.433536                                       | -1.614583         | 6.104654          | 2.499334                                       | -1.437424         | 6.240753          |
| C(10)  | 2.723103                                       | -0.177951         | 5.666636          | 2.715811                                       | -0.160223         | 5.683353          | 2.692016                                       | -0.009024         | 5.717632          |
| H(7A)  | -0.098959                                      | -1.777006         | 7.087652          | -0.126785                                      | -1.661483         | 7.198484          | -0.098998                                      | -1.580378         | 7.307435          |
| H(7B)  | -0.861731                                      | -2.266612         | 5.552786          | -0.868170                                      | -2.242564         | 5.685573          | -0.751039                                      | -2.305039         | 5.816138          |
| H(8A)  | 0.207387                                       | 0.498550          | 6.327950          | 0.215389                                       | 0.554166          | 6.308284          | 0.166636                                       | 0.594532          | 6.276192          |
| H(8B)  | -1.411380                                      | 0.030210          | 5.803858          | -1.403638                                      | 0.064395          | 5.810875          | -1.412206                                      | -0.026874         | 5.806502          |
| H(9A)  | 2.469196                                       | -1.780732         | 7.094802          | 2.478590                                       | -1.660978         | 7.212693          | 2.542525                                       | -1.384921         | 7.348879          |
| H(9B)  | 3.239239                                       | -2.270738         | 5.563661          | 3.235624                                       | -2.253810         | 5.712312          | 3.348415                                       | -2.046111         | 5.904411          |
| H(10A) | 2.170505                                       | 0.495827          | 6.334361          | 2.165630                                       | 0.553379          | 6.309642          | 2.086861                                       | 0.701009          | 6.294008          |
| H(10B) | 3.791821                                       | 0.024990          | 5.820478          | 3.784759                                       | 0.048883          | 5.827486          | 3.741093                                       | 0.282649          | 5.860182          |

**Table 53S.** Cartesian coordinates for azaester derivative (X = H, R = H) with B-N distance constrained to 3.0 Å (*a*), 3.1 Å (*b*) and 3.2 Å (*c*).

| Atom   | $d_{\text{B-N}} = 3.0 \text{ \AA} \text{ (a)}$ |                   |                   | $d_{\text{B-N}} = 3.1 \text{ \AA} \text{ (b)}$ |                   |                   | $d_{\text{B-N}} = 3.2 \text{ \AA} \text{ (c)}$ |                   |                   |
|--------|------------------------------------------------|-------------------|-------------------|------------------------------------------------|-------------------|-------------------|------------------------------------------------|-------------------|-------------------|
|        | $x / \text{ \AA}$                              | $y / \text{ \AA}$ | $z / \text{ \AA}$ | $x / \text{ \AA}$                              | $y / \text{ \AA}$ | $z / \text{ \AA}$ | $x / \text{ \AA}$                              | $y / \text{ \AA}$ | $z / \text{ \AA}$ |
| C(1)   | 1.203519                                       | 0.000000          | 2.129981          | 1.203354                                       | 0.000000          | 2.130209          | 1.202733                                       | 0.000000          | 2.130902          |
| C(2)   | 0.000000                                       | 0.000000          | 1.397666          | 0.000000                                       | 0.000000          | 1.397557          | 0.000000                                       | 0.000000          | 1.397447          |
| C(3)   | 0.000000                                       | 0.000000          | 0.000000          | 0.000000                                       | 0.000000          | 0.000000          | 0.000000                                       | 0.000000          | 0.000000          |
| C(4)   | 1.211564                                       | -0.001659         | -0.699706         | 1.212194                                       | -0.007926         | -0.698815         | 1.212346                                       | -0.011266         | -0.698410         |
| C(5)   | 2.419532                                       | -0.001934         | 0.006261          | 2.419970                                       | -0.013265         | 0.007635          | 2.419890                                       | -0.020982         | 0.008472          |
| C(6)   | 2.410864                                       | 0.001829          | 1.403766          | 2.411199                                       | -0.005436         | 1.405126          | 2.410885                                       | -0.012668         | 1.405870          |
| H(2)   | -0.948393                                      | -0.001628         | 1.935455          | -0.948416                                      | 0.001298          | 1.935184          | -0.948735                                      | 0.003855          | 1.934676          |
| H(3)   | -0.944465                                      | 0.001456          | -0.546458         | -0.944119                                      | 0.007100          | -0.546910         | -0.944051                                      | 0.009905          | -0.546884         |
| H(4)   | 1.214213                                       | -0.001915         | -1.790837         | 1.215689                                       | -0.007808         | -1.789941         | 1.216252                                       | -0.010579         | -1.789526         |
| H(5)   | 3.367028                                       | -0.003259         | -0.534873         | 3.367564                                       | -0.020896         | -0.533234         | 3.367655                                       | -0.032218         | -0.531995         |
| H(6)   | 3.355947                                       | 0.006731          | 1.946980          | 3.356170                                       | -0.003770         | 1.948747          | 3.355828                                       | -0.014820         | 1.949549          |
| B(1)   | 1.206748                                       | 0.012693          | 3.701499          | 1.198594                                       | 0.018797          | 3.700025          | 1.201539                                       | 0.018544          | 3.698211          |
| O(1)   | -0.017114                                      | -0.106865         | 4.323154          | -0.026267                                      | -0.113100         | 4.316245          | -0.021634                                      | -0.097628         | 4.326400          |
| O(2)   | 2.432800                                       | 0.194075          | 4.305007          | 2.419422                                       | 0.181031          | 4.318371          | 2.422945                                       | 0.144725          | 4.323145          |
| N(1)   | 1.430098                                       | -2.022412         | 5.894320          | 1.387123                                       | -1.972286         | 6.068579          | 1.348275                                       | -1.875040         | 6.273634          |
| H(1)   | 1.505215                                       | -3.020454         | 6.038784          | 1.465893                                       | -2.947105         | 6.326285          | 1.407694                                       | -2.809418         | 6.656087          |
| C(7)   | 0.155362                                       | -1.507880         | 6.365105          | 0.093538                                       | -1.424000         | 6.440092          | 0.060674                                       | -1.261917         | 6.558624          |
| C(8)   | -0.245078                                      | -0.162412         | 5.725808          | -0.279866                                      | -0.112689         | 5.717163          | -0.280579                                      | -0.007745         | 5.725727          |
| C(9)   | 2.655917                                       | -1.333128         | 6.258508          | 2.602738                                       | -1.239129         | 6.379724          | 2.581542                                       | -1.131332         | 6.484957          |
| C(10)  | 2.769784                                       | 0.090912          | 5.683110          | 2.722432                                       | 0.144450          | 5.709962          | 2.706510                                       | 0.199651          | 5.719917          |
| H(7A)  | 0.110878                                       | -1.363724         | 7.466352          | -0.009661                                      | -1.214877         | 7.527572          | -0.066032                                      | -0.954038         | 7.620407          |
| H(7B)  | -0.603298                                      | -2.257618         | 6.103122          | -0.654367                                      | -2.186741         | 6.183877          | -0.698220                                      | -2.029647         | 6.353902          |
| H(8A)  | 0.247482                                       | 0.678950          | 6.228072          | 0.200645                                       | 0.751218          | 6.191463          | 0.202073                                       | 0.883649          | 6.142413          |
| H(8B)  | -1.325481                                      | -0.025604         | 5.871714          | -1.363093                                      | 0.030516          | 5.833969          | -1.363272                                      | 0.154368          | 5.823252          |
| H(9A)  | 2.805761                                       | -1.237152         | 7.356058          | 2.748773                                       | -1.056249         | 7.467355          | 2.771309                                       | -0.874212         | 7.550854          |
| H(9B)  | 3.486718                                       | -1.935252         | 5.865932          | 3.440879                                       | -1.863411         | 6.040414          | 3.400768                                       | -1.788852         | 6.161226          |
| H(10A) | 2.188489                                       | 0.807452          | 6.276741          | 2.131569                                       | 0.895472          | 6.248299          | 2.114756                                       | 0.988308          | 6.198846          |
| H(10B) | 3.821575                                       | 0.398333          | 5.765145          | 3.772802                                       | 0.454978          | 5.798593          | 3.757847                                       | 0.509052          | 5.800307          |

**Table 54S.** Cartesian coordinates for azaester derivative (X = H, R = H) with B-N distance constrained to 3.3 Å.

| <i>Atom</i> | $d_{\text{B-N}} = 3.3 \text{ \AA} (a)$ |                |                |
|-------------|----------------------------------------|----------------|----------------|
|             | $x / \text{Å}$                         | $y / \text{Å}$ | $z / \text{Å}$ |
| C(1)        | 1.203972                               | 0.000000       | 2.128967       |
| C(2)        | 0.000000                               | 0.000000       | 1.397537       |
| C(3)        | 0.000000                               | 0.000000       | 0.000000       |
| C(4)        | 1.211446                               | -0.005507      | -0.699782      |
| C(5)        | 2.419950                               | -0.007531      | 0.005437       |
| C(6)        | 2.411823                               | -0.001713      | 1.402610       |
| H(2)        | -0.948309                              | 0.000376       | 1.935674       |
| H(3)        | -0.944561                              | 0.002640       | -0.546122      |
| H(4)        | 1.213628                               | -0.007650      | -1.790884      |
| H(5)        | 3.367192                               | -0.011880      | -0.536002      |
| H(6)        | 3.356839                               | 0.002491       | 1.945972       |
| B(1)        | 1.213557                               | 0.014718       | 3.693972       |
| O(1)        | 0.000921                               | -0.123966      | 4.343027       |
| O(2)        | 2.437083                               | 0.137264       | 4.318252       |
| N(1)        | 1.440129                               | -1.767853      | 6.461843       |
| H(1)        | 1.550311                               | -2.647608      | 6.948055       |
| C(7)        | 0.100643                               | -1.223126      | 6.625635       |
| C(8)        | -0.258914                              | -0.009983      | 5.743302       |
| C(9)        | 2.611234                               | -0.914570      | 6.618462       |
| C(10)       | 2.708516                               | 0.329901       | 5.705816       |
| H(7A)       | -0.121945                              | -0.887658      | 7.663572       |
| H(7B)       | -0.599275                              | -2.038652      | 6.395094       |
| H(8A)       | 0.199752                               | 0.903647       | 6.138014       |
| H(8B)       | -1.345408                              | 0.127992       | 5.834011       |
| H(9A)       | 2.734945                               | -0.513494      | 7.649645       |
| H(9B)       | 3.482930                               | -1.553422      | 6.419351       |
| H(10A)      | 2.098843                               | 1.152250       | 6.097292       |
| H(10B)      | 3.752809                               | 0.667915       | 5.761537       |
